# Supplementary material for: Loss of a co-twin at birth and subsequent risk of psychiatric disorders
Source: eLife. 2021 Jan 28;10:e63514. doi: 10.7554/eLife.63514 (PMC7843130; doi:10.7554/eLife.63514)
Supplement: Figure 2—source data 1. [file elife-63514-fig2-data1.xls]

## Sheet: 2A
_t	hr	hr_lci	hr_uci
36.7091	0.739746	0.5	1.23758
36.7091	0.739746	0.5	1.23758
36.7091	0.739746	0.5	1.23758
4.24641	1.4799	1.10298	1.98562
36.7091	0.739746	0.5	1.23758
36.7091	0.739746	0.5	1.23758
3.70979	1.42635	1.03905	1.95802
3.70979	1.42635	1.03905	1.95802
3.70979	1.42635	1.03905	1.95802
1.83984	1.235	0.812051	1.87824
3.70979	1.42635	1.03905	1.95802
3.70979	1.42635	1.03905	1.95802
36.7091	0.739746	0.5	1.23758
36.7091	0.739746	0.5	1.23758
36.7091	0.739746	0.5	1.23758
36.7091	0.739746	0.5	1.23758
36.7091	0.739746	0.5	1.23758
36.7091	0.739746	0.5	1.23758
36.6324	0.740999	0.5	1.2384
36.6324	0.740999	0.5	1.2384
36.6324	0.740999	0.5	1.2384
36.6324	0.740999	0.5	1.2384
36.6324	0.740999	0.5	1.2384
23.8193	1.17077	0.91006	1.50617
36.5476	0.742398	0.5	1.23932
1.25394	1.17759	0.740998	1.87142
36.5476	0.742398	0.5	1.23932
36.5476	0.742398	0.5	1.23932
3.75086	1.43048	1.04399	1.96005
36.3943	0.744958	0.5	1.24099
36.3806	0.745189	0.5	1.24114
25.4839	1.08069	0.810728	1.44055
29.3361	0.919169	0.629668	1.34177
33.6646	0.798051	0.500098	1.27352
36.3806	0.745189	0.5	1.24114
36.3806	0.745189	0.5	1.24114
27.2361	0.999657	0.719611	1.38869
36.3806	0.745189	0.5	1.24114
36.3806	0.745189	0.5	1.24114
36.3806	0.745189	0.5	1.24114
23.4497	1.19215	0.933024	1.52324
36.3806	0.745189	0.5	1.24114
30.9925	0.866513	0.572152	1.31232
36.2984	0.746579	0.5	1.24204
36.2984	0.746579	0.5	1.24204
36.2984	0.746579	0.5	1.24204
36.2984	0.746579	0.5	1.24204
36.2984	0.746579	0.5	1.24204
36.2984	0.746579	0.5	1.24204
36.2984	0.746579	0.5	1.24204
30.423	0.883642	0.590699	1.32186
28.4627	0.950632	0.664624	1.35972
33.3005	0.806326	0.508602	1.27833
33.3005	0.806326	0.508602	1.27833
36.2136	0.748028	0.5	1.24298
32.5832	0.823551	0.5265	1.2882
36.2136	0.748028	0.5	1.24298
36.2136	0.748028	0.5	1.24298
33.3443	0.805314	0.507559	1.27775
26.5845	1.0282	0.751749	1.40631
40.4654	0.688109	0.5	1.20099
40.4654	0.688109	0.5	1.20099
40.4654	0.688109	0.5	1.20099
2.08624	1.26024	0.841867	1.88653
40.4654	0.688109	0.5	1.20099
40.4654	0.688109	0.5	1.20099
35.3812	0.762938	0.5	1.25241
20.5832	1.37692	1.11545	1.69968
35.3812	0.762938	0.5	1.25241
35.3812	0.762938	0.5	1.25241
35.3812	0.762938	0.5	1.25241
35.3812	0.762938	0.5	1.25241
1.03217	1.15847	0.713283	1.88153
35.1211	0.767868	0.5	1.25546
36.2136	0.748028	0.5	1.24298
36.2136	0.748028	0.5	1.24298
36.2136	0.748028	0.5	1.24298
14.9788	1.83349	1.41053	2.38328
36.1287	0.74949	0.5	1.24392
36.1287	0.74949	0.5	1.24392
36.1287	0.74949	0.5	1.24392
36.1287	0.74949	0.5	1.24392
25.1253	1.09903	0.831205	1.45315
20.2738	1.39948	1.13517	1.72534
36.1287	0.74949	0.5	1.24392
36.1287	0.74949	0.5	1.24392
36.1287	0.74949	0.5	1.24392
36.1287	0.74949	0.5	1.24392
33.807	0.794898	0.5	1.27168
33.1307	0.81029	0.512698	1.28062
36.0465	0.750917	0.5	1.24483
36.0465	0.750917	0.5	1.24483
36.0465	0.750917	0.5	1.24483
36.0465	0.750917	0.5	1.24483
31.0883	0.863726	0.569151	1.31076
36.0465	0.750917	0.5	1.24483
36.0465	0.750917	0.5	1.24483
36.0465	0.750917	0.5	1.24483
36.0465	0.750917	0.5	1.24483
36.0465	0.750917	0.5	1.24483
28.2108	0.960222	0.675342	1.36527
25.5633	1.07671	0.806277	1.43786
36.0465	0.750917	0.5	1.24483
30.8145	0.871761	0.577816	1.31524
36.0465	0.750917	0.5	1.24483
36.0465	0.750917	0.5	1.24483
17.1718	1.64742	1.31016	2.07149
36.0465	0.750917	0.5	1.24483
36.0465	0.750917	0.5	1.24483
36.0465	0.750917	0.5	1.24483
25.0431	1.10332	0.83598	1.45614
36.0465	0.750917	0.5	1.24483
36.0465	0.750917	0.5	1.24483
36.0465	0.750917	0.5	1.24483
20.835	1.35901	1.09935	1.68001
35.9617	0.752405	0.5	1.24578
35.9617	0.752405	0.5	1.24578
35.9617	0.752405	0.5	1.24578
35.9617	0.752405	0.5	1.24578
35.9617	0.752405	0.5	1.24578
35.8795	0.753857	0.5	1.24671
35.8795	0.753857	0.5	1.24671
35.8795	0.753857	0.5	1.24671
35.8795	0.753857	0.5	1.24671
35.8795	0.753857	0.5	1.24671
0.747433	1.13987	0.674534	1.92623
35.8795	0.753857	0.5	1.24671
35.8795	0.753857	0.5	1.24671
35.8795	0.753857	0.5	1.24671
35.8795	0.753857	0.5	1.24671
25.1663	1.0969	0.82883	1.45166
35.8795	0.753857	0.5	1.24671
36.8569	0.737357	0.5	1.236
34.7296	0.775543	0.5	1.26014
40.3806	0.689148	0.5	1.20176
40.3806	0.689148	0.5	1.20176
40.3806	0.689148	0.5	1.20176
40.3806	0.689148	0.5	1.20176
37.0459	0.734359	0.5	1.234
36.2081	0.748122	0.5	1.24304
34.4148	0.781943	0.5	1.264
21.7522	1.29689	1.04058	1.61634
37.0459	0.734359	0.5	1.234
23.885	1.16702	0.905999	1.50323
29.963	0.898207	0.606601	1.33
35.0472	0.769294	0.5	1.25634
35.0472	0.769294	0.5	1.25634
0.481862	1.13834	0.627363	2.06551
35.0472	0.769294	0.5	1.25634
32.0493	0.837209	0.540866	1.29592
7.16496	1.76215	1.40099	2.21641
27.6277	0.983362	0.701287	1.37889
35.7947	0.755371	0.5	1.24767
30.2012	0.890581	0.598261	1.32573
35.7947	0.755371	0.5	1.24767
25.2238	1.09393	0.825518	1.4496
35.7098	0.756898	0.5	1.24863
35.7098	0.756898	0.5	1.24863
22.9979	1.21892	0.961351	1.54549
35.7098	0.756898	0.5	1.24863
35.7098	0.756898	0.5	1.24863
35.7098	0.756898	0.5	1.24863
35.6331	0.758289	0.5	1.24951
35.6331	0.758289	0.5	1.24951
35.6331	0.758289	0.5	1.24951
35.6331	0.758289	0.5	1.24951
26.5079	1.03168	0.755666	1.4085
35.6331	0.758289	0.5	1.24951
35.5483	0.759842	0.5	1.25048
35.5483	0.759842	0.5	1.25048
35.5483	0.759842	0.5	1.25048
35.5483	0.759842	0.5	1.25048
35.5483	0.759842	0.5	1.25048
35.5483	0.759842	0.5	1.25048
35.4661	0.761358	0.5	1.25143
35.4661	0.761358	0.5	1.25143
35.4661	0.761358	0.5	1.25143
35.4661	0.761358	0.5	1.25143
21.5578	1.30969	1.05303	1.6289
35.4661	0.761358	0.5	1.25143
35.4661	0.761358	0.5	1.25143
31.2553	0.858932	0.564001	1.30809
35.4661	0.761358	0.5	1.25143
18.13	1.56967	1.26295	1.95087
21.755	1.29672	1.04041	1.61617
10.5352	2.02554	1.54452	2.65636
35.3812	0.762938	0.5	1.25241
35.3812	0.762938	0.5	1.25241
35.3812	0.762938	0.5	1.25241
35.3812	0.762938	0.5	1.25241
35.3812	0.762938	0.5	1.25241
35.3812	0.762938	0.5	1.25241
40.2984	0.690157	0.5	1.2025
40.2984	0.690157	0.5	1.2025
40.2984	0.690157	0.5	1.2025
40.2984	0.690157	0.5	1.2025
40.2984	0.690157	0.5	1.2025
40.2984	0.690157	0.5	1.2025
34.2149	0.786115	0.5	1.26649
24.7474	1.11903	0.853423	1.46731
34.2149	0.786115	0.5	1.26649
34.2149	0.786115	0.5	1.26649
34.2149	0.786115	0.5	1.26649
34.2149	0.786115	0.5	1.26649
35.2991	0.764481	0.5	1.25337
26.1766	1.04701	0.772923	1.41828
35.2991	0.764481	0.5	1.25337
28.846	0.936488	0.648867	1.3516
35.2991	0.764481	0.5	1.25337
35.2991	0.764481	0.5	1.25337
20.5941	1.37613	1.11475	1.6988
35.2991	0.764481	0.5	1.25337
35.2991	0.764481	0.5	1.25337
35.2991	0.764481	0.5	1.25337
35.2991	0.764481	0.5	1.25337
35.2991	0.764481	0.5	1.25337
34.8802	0.772554	0.5	1.25833
34.8802	0.772554	0.5	1.25833
34.8802	0.772554	0.5	1.25833
34.8802	0.772554	0.5	1.25833
34.8802	0.772554	0.5	1.25833
34.8802	0.772554	0.5	1.25833
34.8802	0.772554	0.5	1.25833
34.8802	0.772554	0.5	1.25833
34.8802	0.772554	0.5	1.25833
4.10951	1.46631	1.08681	1.97834
34.8802	0.772554	0.5	1.25833
30.9952	0.866433	0.572066	1.31227
34.7953	0.774233	0.5	1.25935
34.7953	0.774233	0.5	1.25935
14.4175	1.88002	1.43467	2.46363
3.50171	1.40538	1.01394	1.94793
34.7953	0.774233	0.5	1.25935
34.7953	0.774233	0.5	1.25935
23.3676	1.19696	0.938154	1.52717
34.7953	0.774233	0.5	1.25935
30.8528	0.870623	0.576586	1.31461
34.7953	0.774233	0.5	1.25935
34.7953	0.774233	0.5	1.25935
34.7953	0.774233	0.5	1.25935
34.7953	0.774233	0.5	1.25935
34.0315	0.790019	0.5	1.2688
34.7953	0.774233	0.5	1.25935
33.6235	0.798969	0.501038	1.27406
34.7953	0.774233	0.5	1.25935
34.7953	0.774233	0.5	1.25935
34.7953	0.774233	0.5	1.25935
34.0315	0.790019	0.5	1.2688
34.7953	0.774233	0.5	1.25935
34.7953	0.774233	0.5	1.25935
33.6235	0.798969	0.501038	1.27406
34.7953	0.774233	0.5	1.25935
22.5024	1.24916	0.992708	1.57186
21.3388	1.32433	1.06707	1.64362
30.4285	0.883473	0.590515	1.32177
40.2984	0.690157	0.5	1.2025
36.5092	0.743034	0.5	1.23974
17.4237	1.62673	1.2981	2.03855
36.794	0.73837	0.5	1.23667
36.794	0.73837	0.5	1.23667
36.794	0.73837	0.5	1.23667
36.794	0.73837	0.5	1.23667
26.0972	1.05075	0.777138	1.42071
30.8337	0.871192	0.5772	1.31492
22.0068	1.28041	1.02429	1.60057
33.963	0.791495	0.5	1.26967
30.9843	0.866753	0.572411	1.31245
29.5003	0.91355	0.623465	1.3386
33.963	0.791495	0.5	1.26967
33.963	0.791495	0.5	1.26967
34.7105	0.775927	0.5	1.26038
34.7105	0.775927	0.5	1.26038
30.6639	0.876276	0.582701	1.31776
34.7105	0.775927	0.5	1.26038
34.7105	0.775927	0.5	1.26038
34.7105	0.775927	0.5	1.26038
34.6338	0.777469	0.5	1.26131
28.7584	0.939673	0.652411	1.35342
33.87	0.793518	0.5	1.27087
34.6338	0.777469	0.5	1.26131
34.6338	0.777469	0.5	1.26131
34.6338	0.777469	0.5	1.26131
20.5065	1.38245	1.12034	1.70588
34.6338	0.777469	0.5	1.26131
34.6338	0.777469	0.5	1.26131
22.9213	1.22353	0.966184	1.54943
34.6338	0.777469	0.5	1.26131
34.6338	0.777469	0.5	1.26131
34.6338	0.777469	0.5	1.26131
27.2909	0.99734	0.717004	1.38728
22.5079	1.24882	0.99236	1.57156
34.6338	0.777469	0.5	1.26131
34.6338	0.777469	0.5	1.26131
34.6338	0.777469	0.5	1.26131
34.5489	0.779191	0.5	1.26235
34.5489	0.779191	0.5	1.26235
34.5489	0.779191	0.5	1.26235
34.5489	0.779191	0.5	1.26235
22.8364	1.22867	0.971543	1.55385
34.5489	0.779191	0.5	1.26235
34.4668	0.780871	0.5	1.26336
34.4668	0.780871	0.5	1.26336
22.089	1.27516	1.01904	1.59563
34.4668	0.780871	0.5	1.26336
34.4668	0.780871	0.5	1.26336
24.5175	1.13156	0.867263	1.47641
34.3819	0.782623	0.5	1.26441
34.3819	0.782623	0.5	1.26441
34.3819	0.782623	0.5	1.26441
34.3819	0.782623	0.5	1.26441
34.3819	0.782623	0.5	1.26441
34.3819	0.782623	0.5	1.26441
34.2998	0.784333	0.5	1.26543
21.922	1.28587	1.02972	1.60574
34.2998	0.784333	0.5	1.26543
34.2998	0.784333	0.5	1.26543
31.9288	0.840394	0.544236	1.29771
34.2998	0.784333	0.5	1.26543
22.9624	1.22106	0.963594	1.54732
34.2149	0.786115	0.5	1.26649
34.2149	0.786115	0.5	1.26649
33.3361	0.805504	0.507754	1.27785
34.2149	0.786115	0.5	1.26649
34.2149	0.786115	0.5	1.26649
29.0732	0.928352	0.639835	1.34697
33.2129	0.808363	0.510706	1.27951
33.2129	0.808363	0.510706	1.27951
32.0411	0.837425	0.541094	1.29604
15.6359	1.77749	1.38133	2.28727
9.66735	1.9866	1.53717	2.56743
11.2142	2.03808	1.53863	2.69966
25.8973	1.06032	0.787885	1.42695
34.13	0.787912	0.5	1.26756
34.13	0.787912	0.5	1.26756
34.13	0.787912	0.5	1.26756
22.5927	1.24357	0.986972	1.56689
34.13	0.787912	0.5	1.26756
16.2136	1.72803	1.35501	2.20374
34.13	0.787912	0.5	1.26756
34.13	0.787912	0.5	1.26756
34.13	0.787912	0.5	1.26756
34.13	0.787912	0.5	1.26756
29.7522	0.90511	0.614174	1.33386
34.13	0.787912	0.5	1.26756
34.13	0.787912	0.5	1.26756
34.13	0.787912	0.5	1.26756
27.0938	1.00574	0.726457	1.39239
1.8371	1.23472	0.81172	1.87816
34.13	0.787912	0.5	1.26756
34.13	0.787912	0.5	1.26756
34.13	0.787912	0.5	1.26756
21.2977	1.32711	1.0697	1.64645
34.13	0.787912	0.5	1.26756
34.13	0.787912	0.5	1.26756
29.8234	0.902763	0.611596	1.33255
33.963	0.791495	0.5	1.26967
32.7912	0.818425	0.521147	1.28528
33.963	0.791495	0.5	1.26967
33.963	0.791495	0.5	1.26967
30.9843	0.866753	0.572411	1.31245
33.963	0.791495	0.5	1.26967
33.963	0.791495	0.5	1.26967
32.8296	0.817492	0.520175	1.28475
33.963	0.791495	0.5	1.26967
33.963	0.791495	0.5	1.26967
33.963	0.791495	0.5	1.26967
33.8809	0.793279	0.5	1.27072
33.8809	0.793279	0.5	1.27072
12.4189	2.0125	1.50966	2.68284
24.1697	1.15091	0.888479	1.49084
33.8809	0.793279	0.5	1.27072
33.8809	0.793279	0.5	1.27072
24.345	1.14111	0.877762	1.48348
40.2984	0.690157	0.5	1.2025
40.2984	0.690157	0.5	1.2025
35.666	0.757692	0.5	1.24913
36.7748	0.73868	0.5	1.23688
40.2984	0.690157	0.5	1.2025
33.0459	0.812297	0.514778	1.28177
33.0459	0.812297	0.514778	1.28177
33.0459	0.812297	0.514778	1.28177
33.0459	0.812297	0.514778	1.28177
33.0459	0.812297	0.514778	1.28177
33.0459	0.812297	0.514778	1.28177
33.8809	0.793279	0.5	1.27072
33.8809	0.793279	0.5	1.27072
33.8809	0.793279	0.5	1.27072
33.8809	0.793279	0.5	1.27072
33.8809	0.793279	0.5	1.27072
29.8234	0.902763	0.611596	1.33255
18.204	1.56372	1.25908	1.94207
33.796	0.795139	0.5	1.27182
33.796	0.795139	0.5	1.27182
33.796	0.795139	0.5	1.27182
32.1013	0.835846	0.539425	1.29515
33.796	0.795139	0.5	1.27182
33.7112	0.797015	0.5	1.27292
33.7112	0.797015	0.5	1.27292
33.7112	0.797015	0.5	1.27292
33.7112	0.797015	0.5	1.27292
33.7112	0.797015	0.5	1.27292
33.7112	0.797015	0.5	1.27292
33.6318	0.798785	0.50085	1.27395
21.0294	1.34546	1.0869	1.66553
33.6318	0.798785	0.50085	1.27395
29.6728	0.907747	0.617074	1.33534
33.6318	0.798785	0.50085	1.27395
4.83504	1.53776	1.17105	2.0193
33.5469	0.800693	0.502806	1.27506
33.5469	0.800693	0.502806	1.27506
33.5469	0.800693	0.502806	1.27506
33.5469	0.800693	0.502806	1.27506
33.5469	0.800693	0.502806	1.27506
4.75017	1.52947	1.16141	2.01418
33.128	0.810354	0.512765	1.28065
27.8357	0.974953	0.691846	1.37391
33.128	0.810354	0.512765	1.28065
33.128	0.810354	0.512765	1.28065
29.3963	0.917098	0.62738	1.3406
33.128	0.810354	0.512765	1.28065
33.128	0.810354	0.512765	1.28065
33.128	0.810354	0.512765	1.28065
27.2635	0.998497	0.718305	1.38798
33.128	0.810354	0.512765	1.28065
33.128	0.810354	0.512765	1.28065
33.128	0.810354	0.512765	1.28065
33.128	0.810354	0.512765	1.28065
28.2382	0.959168	0.674163	1.36466
33.128	0.810354	0.512765	1.28065
33.128	0.810354	0.512765	1.28065
33.128	0.810354	0.512765	1.28065
33.128	0.810354	0.512765	1.28065
33.0459	0.812297	0.514778	1.28177
33.0459	0.812297	0.514778	1.28177
33.0459	0.812297	0.514778	1.28177
27.5838	0.985154	0.703301	1.37996
33.0459	0.812297	0.514778	1.28177
33.0459	0.812297	0.514778	1.28177
22.4175	1.25444	0.998103	1.5766
9.74949	1.99139	1.53868	2.57729
7.83573	1.82753	1.45143	2.30108
40.2136	0.691204	0.5	1.20327
29.4127	0.916535	0.626759	1.34029
40.2136	0.691204	0.5	1.20327
32.0465	0.837281	0.540942	1.29596
32.0465	0.837281	0.540942	1.29596
32.0465	0.837281	0.540942	1.29596
32.0465	0.837281	0.540942	1.29596
32.0465	0.837281	0.540942	1.29596
32.0465	0.837281	0.540942	1.29596
33.0459	0.812297	0.514778	1.28177
33.0459	0.812297	0.514778	1.28177
33.0459	0.812297	0.514778	1.28177
33.0459	0.812297	0.514778	1.28177
33.0459	0.812297	0.514778	1.28177
33.0459	0.812297	0.514778	1.28177
32.961	0.814322	0.516879	1.28293
32.961	0.814322	0.516879	1.28293
32.961	0.814322	0.516879	1.28293
32.961	0.814322	0.516879	1.28293
32.961	0.814322	0.516879	1.28293
32.961	0.814322	0.516879	1.28293
32.8789	0.816299	0.518933	1.28406
32.8789	0.816299	0.518933	1.28406
32.8789	0.816299	0.518933	1.28406
32.8789	0.816299	0.518933	1.28406
29.3333	0.919263	0.629773	1.34182
32.8789	0.816299	0.518933	1.28406
32.7091	0.820436	0.523244	1.28643
32.7091	0.820436	0.523244	1.28643
32.7091	0.820436	0.523244	1.28643
32.7091	0.820436	0.523244	1.28643
32.7091	0.820436	0.523244	1.28643
32.7091	0.820436	0.523244	1.28643
32.7091	0.820436	0.523244	1.28643
30.3326	0.886451	0.593756	1.32343
32.7091	0.820436	0.523244	1.28643
1.99589	1.25096	0.830925	1.88332
30.7488	0.873723	0.579937	1.31634
32.7091	0.820436	0.523244	1.28643
32.6324	0.822327	0.52522	1.2875
32.6324	0.822327	0.52522	1.2875
32.6324	0.822327	0.52522	1.2875
32.6324	0.822327	0.52522	1.2875
32.6324	0.822327	0.52522	1.2875
32.6324	0.822327	0.52522	1.2875
32.5476	0.824439	0.527429	1.2887
32.5476	0.824439	0.527429	1.2887
32.5476	0.824439	0.527429	1.2887
29.6427	0.908753	0.618181	1.33591
32.5476	0.824439	0.527429	1.2887
32.5476	0.824439	0.527429	1.2887
24.1615	1.15137	0.888983	1.49119
32.4654	0.8265	0.529589	1.28987
32.4654	0.8265	0.529589	1.28987
32.4654	0.8265	0.529589	1.28987
32.4654	0.8265	0.529589	1.28987
32.4654	0.8265	0.529589	1.28987
40.2136	0.691204	0.5	1.20327
40.2136	0.691204	0.5	1.20327
40.2136	0.691204	0.5	1.20327
40.2136	0.691204	0.5	1.20327
40.2136	0.691204	0.5	1.20327
40.2136	0.691204	0.5	1.20327
30.8802	0.869813	0.575711	1.31416
30.8802	0.869813	0.575711	1.31416
30.8802	0.869813	0.575711	1.31416
30.8802	0.869813	0.575711	1.31416
22.8775	1.22618	0.968949	1.5517
30.8802	0.869813	0.575711	1.31416
32.4654	0.8265	0.529589	1.28987
26.3135	1.04061	0.765727	1.41418
32.4654	0.8265	0.529589	1.28987
11.0883	2.03715	1.54042	2.69408
32.4654	0.8265	0.529589	1.28987
22.0014	1.28076	1.02464	1.6009
30.089	0.894153	0.602162	1.32773
32.4654	0.8265	0.529589	1.28987
32.4654	0.8265	0.529589	1.28987
32.4654	0.8265	0.529589	1.28987
32.4654	0.8265	0.529589	1.28987
32.4654	0.8265	0.529589	1.28987
22.6886	1.23768	0.980896	1.5617
32.3806	0.828648	0.531843	1.29109
32.3806	0.828648	0.531843	1.29109
32.3806	0.828648	0.531843	1.29109
20.668	1.37084	1.11003	1.69294
3.00342	1.35468	0.953425	1.92481
32.3806	0.828648	0.531843	1.29109
32.3806	0.828648	0.531843	1.29109
32.3806	0.828648	0.531843	1.29109
32.3806	0.828648	0.531843	1.29109
32.3806	0.828648	0.531843	1.29109
32.3806	0.828648	0.531843	1.29109
0.668036	1.13697	0.662251	1.95198
22.7652	1.233	0.976043	1.5576
29.8125	0.903123	0.611992	1.33275
32.2984	0.830744	0.534047	1.29228
32.2984	0.830744	0.534047	1.29228
32.2984	0.830744	0.534047	1.29228
32.2136	0.832928	0.536347	1.29351
32.2136	0.832928	0.536347	1.29351
32.2136	0.832928	0.536347	1.29351
32.2136	0.832928	0.536347	1.29351
20.5832	1.37692	1.11545	1.69968
32.2136	0.832928	0.536347	1.29351
32.1287	0.835131	0.53867	1.29475
32.1287	0.835131	0.53867	1.29475
0.150582	1.25472	0.5	3.27254
10.7515	2.03131	1.54365	2.67302
32.1287	0.835131	0.53867	1.29475
32.1287	0.835131	0.53867	1.29475
32.1287	0.835131	0.53867	1.29475
24.2491	1.14646	0.883617	1.48748
32.1287	0.835131	0.53867	1.29475
32.1287	0.835131	0.53867	1.29475
32.1287	0.835131	0.53867	1.29475
32.1287	0.835131	0.53867	1.29475
31.9617	0.839522	0.543312	1.29722
31.9617	0.839522	0.543312	1.29722
31.9617	0.839522	0.543312	1.29722
31.9617	0.839522	0.543312	1.29722
31.9617	0.839522	0.543312	1.29722
31.9617	0.839522	0.543312	1.29722
40.1287	0.692254	0.5	1.20404
40.1287	0.692254	0.5	1.20404
40.1287	0.692254	0.5	1.20404
40.1287	0.692254	0.5	1.20404
27.0034	1.00964	0.730852	1.39478
40.1287	0.692254	0.5	1.20404
22.0726	1.2762	1.02009	1.59661
30.13	0.892841	0.600729	1.327
30.13	0.892841	0.600729	1.327
30.13	0.892841	0.600729	1.327
30.13	0.892841	0.600729	1.327
30.13	0.892841	0.600729	1.327
31.9617	0.839522	0.543312	1.29722
8.91718	1.93195	1.51417	2.465
31.9617	0.839522	0.543312	1.29722
26.4038	1.03644	0.761028	1.41152
31.9617	0.839522	0.543312	1.29722
31.9617	0.839522	0.543312	1.29722
31.8795	0.841708	0.545629	1.29845
31.8795	0.841708	0.545629	1.29845
31.8795	0.841708	0.545629	1.29845
31.8795	0.841708	0.545629	1.29845
31.8795	0.841708	0.545629	1.29845
31.8795	0.841708	0.545629	1.29845
31.8795	0.841708	0.545629	1.29845
1.75222	1.22611	0.801464	1.87575
18.8556	1.51125	1.22311	1.86727
31.8795	0.841708	0.545629	1.29845
31.8795	0.841708	0.545629	1.29845
31.8795	0.841708	0.545629	1.29845
25.5825	1.07576	0.805207	1.43722
31.7947	0.843987	0.548048	1.29973
31.7947	0.843987	0.548048	1.29973
31.7947	0.843987	0.548048	1.29973
31.7947	0.843987	0.548048	1.29973
31.7947	0.843987	0.548048	1.29973
11.2498	2.03821	1.53807	2.70096
31.7947	0.843987	0.548048	1.29973
31.7947	0.843987	0.548048	1.29973
31.7947	0.843987	0.548048	1.29973
16.7775	1.68026	1.3288	2.12468
31.7947	0.843987	0.548048	1.29973
31.7947	0.843987	0.548048	1.29973
29.462	0.914852	0.624902	1.33934
0.172485	1.23228	0.500377	3.03474
0.172485	1.23228	0.500377	3.03474
18.9897	1.50041	1.21527	1.85246
31.7947	0.843987	0.548048	1.29973
31.6331	0.848378	0.552719	1.30219
20.501	1.38285	1.12069	1.70633
31.6331	0.848378	0.552719	1.30219
31.6331	0.848378	0.552719	1.30219
30.809	0.871924	0.577992	1.31533
31.6331	0.848378	0.552719	1.30219
9.58248	1.98141	1.53542	2.55695
40.0465	0.693274	0.5	1.20478
30.1766	0.891362	0.599113	1.32617
40.0465	0.693274	0.5	1.20478
36.2574	0.747278	0.5	1.24249
40.0465	0.693274	0.5	1.20478
0.607803	1.13589	0.652127	1.97851
21.4867	1.31442	1.05759	1.63362
27.7947	0.976599	0.693694	1.37488
27.7947	0.976599	0.693694	1.37488
21.6044	1.30661	1.05005	1.62585
27.7947	0.976599	0.693694	1.37488
40.794	0.684122	0.5	1.19806
40.794	0.684122	0.5	1.19806
1.59343	1.21018	0.782276	1.87215
27.6687	0.981688	0.699408	1.3779
21.922	1.28587	1.02972	1.60574
38.1903	0.717424	0.5	1.22233
31.3812	0.855369	0.560184	1.3061
16.6434	1.69155	1.33508	2.1432
31.3812	0.855369	0.560184	1.3061
31.3812	0.855369	0.560184	1.3061
31.3812	0.855369	0.560184	1.3061
31.3812	0.855369	0.560184	1.3061
25.5387	1.07794	0.807655	1.43869
31.2142	0.860103	0.565258	1.30874
31.2142	0.860103	0.565258	1.30874
24.2546	1.14615	0.883282	1.48725
31.2142	0.860103	0.565258	1.30874
28.0465	0.966607	0.682489	1.369
31.1294	0.86254	0.567875	1.3101
31.1294	0.86254	0.567875	1.3101
31.1294	0.86254	0.567875	1.3101
30.6064	0.878018	0.58459	1.31873
31.1294	0.86254	0.567875	1.3101
31.1294	0.86254	0.567875	1.3101
31.0472	0.864917	0.570433	1.31143
31.0472	0.864917	0.570433	1.31143
31.0472	0.864917	0.570433	1.31143
31.0472	0.864917	0.570433	1.31143
25.6838	1.07074	0.799582	1.43385
31.0472	0.864917	0.570433	1.31143
31.0472	0.864917	0.570433	1.31143
0.0985626	1.3401	0.5	4.28547
31.0472	0.864917	0.570433	1.31143
21.9877	1.28164	1.02552	1.60173
31.0472	0.864917	0.570433	1.31143
31.0472	0.864917	0.570433	1.31143
31.0472	0.864917	0.570433	1.31143
31.0472	0.864917	0.570433	1.31143
31.0472	0.864917	0.570433	1.31143
31.0472	0.864917	0.570433	1.31143
31.0472	0.864917	0.570433	1.31143
2.07255	1.25883	0.840208	1.88603
24.4627	1.13459	0.87059	1.47863
29.9904	0.897322	0.60563	1.3295
30.9624	0.867395	0.573102	1.31281
30.9624	0.867395	0.573102	1.31281
30.9624	0.867395	0.573102	1.31281
30.9624	0.867395	0.573102	1.31281
23.102	1.21269	0.954804	1.54022
30.9624	0.867395	0.573102	1.31281
30.9624	0.867395	0.573102	1.31281
25.744	1.06778	0.796261	1.43188
30.9624	0.867395	0.573102	1.31281
1.75222	1.22611	0.801464	1.87575
30.5489	0.879769	0.586491	1.3197
30.5489	0.879769	0.586491	1.3197
30.5489	0.879769	0.586491	1.3197
29.7851	0.904025	0.612982	1.33325
23.0034	1.21859	0.961006	1.54521
30.5489	0.879769	0.586491	1.3197
40.0465	0.693274	0.5	1.20478
9.37166	1.96743	1.53016	2.52965
40.0465	0.693274	0.5	1.20478
29.8344	0.902403	0.611202	1.33235
40.0465	0.693274	0.5	1.20478
38.141	0.718112	0.5	1.22282
34.6338	0.777469	0.5	1.26131
34.6338	0.777469	0.5	1.26131
34.6338	0.777469	0.5	1.26131
21.1444	1.33755	1.07953	1.65723
14.9596	1.83511	1.41137	2.38607
34.6338	0.777469	0.5	1.26131
24.6324	1.12526	0.860314	1.47181
15.4114	1.79672	1.39141	2.32009
24.6324	1.12526	0.860314	1.47181
24.6324	1.12526	0.860314	1.47181
16.7721	1.68072	1.32906	2.12544
14.883	1.84156	1.41471	2.39719
30.2998	0.887478	0.594876	1.324
30.2998	0.887478	0.594876	1.324
5.42642	1.59502	1.23617	2.05804
30.2998	0.887478	0.594876	1.324
30.2998	0.887478	0.594876	1.324
30.2998	0.887478	0.594876	1.324
30.2149	0.890148	0.597788	1.32549
30.2149	0.890148	0.597788	1.32549
30.2149	0.890148	0.597788	1.32549
30.2149	0.890148	0.597788	1.32549
30.2149	0.890148	0.597788	1.32549
30.2149	0.890148	0.597788	1.32549
30.13	0.892841	0.600729	1.327
30.13	0.892841	0.600729	1.327
21.9658	1.28305	1.02692	1.60306
30.13	0.892841	0.600729	1.327
30.13	0.892841	0.600729	1.327
30.13	0.892841	0.600729	1.327
30.13	0.892841	0.600729	1.327
30.13	0.892841	0.600729	1.327
30.13	0.892841	0.600729	1.327
30.13	0.892841	0.600729	1.327
3.39767	1.39484	1.00134	1.94298
30.13	0.892841	0.600729	1.327
30.0479	0.895469	0.603603	1.32847
30.0479	0.895469	0.603603	1.32847
30.0479	0.895469	0.603603	1.32847
30.0479	0.895469	0.603603	1.32847
18.1218	1.57033	1.26338	1.95185
30.0479	0.895469	0.603603	1.32847
16.8296	1.6759	1.32636	2.11756
29.963	0.898207	0.606601	1.33
29.963	0.898207	0.606601	1.33
29.963	0.898207	0.606601	1.33
29.963	0.898207	0.606601	1.33
29.963	0.898207	0.606601	1.33
29.796	0.903664	0.612585	1.33305
22.2834	1.26284	1.00664	1.58424
28.2519	0.958642	0.673575	1.36436
29.796	0.903664	0.612585	1.33305
23.9206	1.16499	0.903802	1.50165
29.796	0.903664	0.612585	1.33305
29.7112	0.906472	0.615671	1.33463
29.7112	0.906472	0.615671	1.33463
1.36345	1.1878	0.754393	1.87019
29.7112	0.906472	0.615671	1.33463
29.7112	0.906472	0.615671	1.33463
29.7112	0.906472	0.615671	1.33463
28.5448	0.947556	0.661192	1.35794
40.0465	0.693274	0.5	1.20478
40.0465	0.693274	0.5	1.20478
40.0465	0.693274	0.5	1.20478
34.5024	0.780141	0.5	1.26292
40.0465	0.693274	0.5	1.20478
23.6331	1.18148	0.921602	1.51465
23.6331	1.18148	0.921602	1.51465
23.6331	1.18148	0.921602	1.51465
23.6331	1.18148	0.921602	1.51465
23.6331	1.18148	0.921602	1.51465
23.6331	1.18148	0.921602	1.51465
29.7112	0.906472	0.615671	1.33463
27.332	0.995611	0.715058	1.38624
29.7112	0.906472	0.615671	1.33463
29.7112	0.906472	0.615671	1.33463
19.6386	1.44803	1.17535	1.78397
29.7112	0.906472	0.615671	1.33463
16.6352	1.69224	1.33547	2.14434
29.6318	0.90912	0.618585	1.33611
29.6318	0.90912	0.618585	1.33611
21.5907	1.30751	1.05093	1.62674
29.6318	0.90912	0.618585	1.33611
29.6318	0.90912	0.618585	1.33611
24.5585	1.12931	0.864774	1.47476
28.3778	0.953837	0.668203	1.36157
29.6318	0.90912	0.618585	1.33611
29.6318	0.90912	0.618585	1.33611
27.2526	0.99896	0.718827	1.38826
15.5236	1.78711	1.38638	2.30367
29.6318	0.90912	0.618585	1.33611
29.6318	0.90912	0.618585	1.33611
29.6318	0.90912	0.618585	1.33611
17.525	1.61848	1.29322	2.02554
29.6318	0.90912	0.618585	1.33611
29.6318	0.90912	0.618585	1.33611
13.4209	1.9553	1.47481	2.59234
13.4209	1.9553	1.47481	2.59234
29.6318	0.90912	0.618585	1.33611
29.6318	0.90912	0.618585	1.33611
0.353183	1.15263	0.592758	2.24132
29.6318	0.90912	0.618585	1.33611
29.6318	0.90912	0.618585	1.33611
27.2526	0.99896	0.718827	1.38826
29.6318	0.90912	0.618585	1.33611
29.6318	0.90912	0.618585	1.33611
29.6318	0.90912	0.618585	1.33611
29.6318	0.90912	0.618585	1.33611
29.6318	0.90912	0.618585	1.33611
29.6318	0.90912	0.618585	1.33611
29.6318	0.90912	0.618585	1.33611
29.6318	0.90912	0.618585	1.33611
29.6318	0.90912	0.618585	1.33611
29.6318	0.90912	0.618585	1.33611
29.5469	0.911974	0.621728	1.33772
29.5469	0.911974	0.621728	1.33772
29.5469	0.911974	0.621728	1.33772
29.5469	0.911974	0.621728	1.33772
29.5469	0.911974	0.621728	1.33772
29.5469	0.911974	0.621728	1.33772
29.5469	0.911974	0.621728	1.33772
29.5469	0.911974	0.621728	1.33772
19.3867	1.46822	1.19115	1.80975
29.5469	0.911974	0.621728	1.33772
27.2498	0.999076	0.718958	1.38833
29.5469	0.911974	0.621728	1.33772
29.5469	0.911974	0.621728	1.33772
29.5469	0.911974	0.621728	1.33772
1.00205	1.1561	0.709414	1.88406
24.9884	1.10619	0.83918	1.45817
29.5469	0.911974	0.621728	1.33772
29.5469	0.911974	0.621728	1.33772
31.1403	0.862224	0.567536	1.30993
19.2717	1.47757	1.19828	1.82195
38.6694	0.710928	0.5	1.21767
39.8795	0.695359	0.5	1.20631
39.8795	0.695359	0.5	1.20631
39.8795	0.695359	0.5	1.20631
29.2977	0.920493	0.631132	1.34252
29.2977	0.920493	0.631132	1.34252
0.5859	1.1358	0.648221	1.99011
0.703628	1.13809	0.667884	1.93933
29.2977	0.920493	0.631132	1.34252
29.0048	0.930783	0.642531	1.34835
29.2977	0.920493	0.631132	1.34252
2.83368	1.33728	0.932749	1.91725
23.5866	1.18418	0.924495	1.5168
1.00479	1.15632	0.709767	1.88381
29.2977	0.920493	0.631132	1.34252
20.115	1.41133	1.14525	1.73921
0.991102	1.15526	0.707999	1.88507
0.388775	1.1469	0.603744	2.17869
29.2129	0.923444	0.634397	1.34419
29.2129	0.923444	0.634397	1.34419
29.2129	0.923444	0.634397	1.34419
29.2129	0.923444	0.634397	1.34419
20.4736	1.38483	1.12244	1.70857
29.128	0.926419	0.637692	1.34587
21.3361	1.32452	1.06725	1.64381
29.128	0.926419	0.637692	1.34587
29.128	0.926419	0.637692	1.34587
29.128	0.926419	0.637692	1.34587
29.128	0.926419	0.637692	1.34587
20.8706	1.35652	1.09707	1.67732
29.128	0.926419	0.637692	1.34587
23.1485	1.20991	0.951879	1.5379
16.9363	1.66697	1.32133	2.10303
29.128	0.926419	0.637692	1.34587
29.0459	0.929323	0.640911	1.34752
29.0459	0.929323	0.640911	1.34752
29.0459	0.929323	0.640911	1.34752
29.0459	0.929323	0.640911	1.34752
16.1533	1.73317	1.35778	2.21235
29.0459	0.929323	0.640911	1.34752
1.1718	1.17022	0.730854	1.87373
29.0459	0.929323	0.640911	1.34752
29.0459	0.929323	0.640911	1.34752
24.7201	1.12051	0.855059	1.46837
29.0459	0.929323	0.640911	1.34752
29.0459	0.929323	0.640911	1.34752
28.961	0.932348	0.644268	1.34924
28.961	0.932348	0.644268	1.34924
28.961	0.932348	0.644268	1.34924
28.961	0.932348	0.644268	1.34924
28.7091	0.941478	0.654419	1.35445
28.961	0.932348	0.644268	1.34924
39.7947	0.696424	0.5	1.20709
0.668036	1.13697	0.662251	1.95198
39.7947	0.696424	0.5	1.20709
39.7947	0.696424	0.5	1.20709
39.7947	0.696424	0.5	1.20709
39.7947	0.696424	0.5	1.20709
28.961	0.932348	0.644268	1.34924
22.6448	1.24037	0.983672	1.56406
28.961	0.932348	0.644268	1.34924
28.961	0.932348	0.644268	1.34924
28.961	0.932348	0.644268	1.34924
28.961	0.932348	0.644268	1.34924
28.961	0.932348	0.644268	1.34924
24.8789	1.11199	0.845621	1.46227
28.961	0.932348	0.644268	1.34924
0.435318	1.14165	0.616325	2.11473
28.961	0.932348	0.644268	1.34924
28.961	0.932348	0.644268	1.34924
28.8789	0.9353	0.647547	1.35092
28.8789	0.9353	0.647547	1.35092
28.8789	0.9353	0.647547	1.35092
28.8789	0.9353	0.647547	1.35092
28.8789	0.9353	0.647547	1.35092
28.8789	0.9353	0.647547	1.35092
28.8789	0.9353	0.647547	1.35092
28.8789	0.9353	0.647547	1.35092
28.8789	0.9353	0.647547	1.35092
19.6359	1.44825	1.17552	1.78424
16.0219	1.74441	1.3638	2.23123
28.8789	0.9353	0.647547	1.35092
22.4997	1.24933	0.992882	1.57201
28.794	0.938376	0.650967	1.35268
28.794	0.938376	0.650967	1.35268
28.794	0.938376	0.650967	1.35268
22.4942	1.24967	0.99323	1.57232
28.794	0.938376	0.650967	1.35268
39.7947	0.696424	0.5	1.20709
27.7563	0.978141	0.695425	1.37579
39.7947	0.696424	0.5	1.20709
39.7947	0.696424	0.5	1.20709
0.618754	1.136	0.654032	1.97313
39.7947	0.696424	0.5	1.20709
28.6324	0.944302	0.657565	1.35607
28.6324	0.944302	0.657565	1.35607
28.6324	0.944302	0.657565	1.35607
20.9391	1.35173	1.09269	1.67219
28.6324	0.944302	0.657565	1.35607
28.6324	0.944302	0.657565	1.35607
28.5476	0.947453	0.661078	1.35788
28.5476	0.947453	0.661078	1.35788
28.5476	0.947453	0.661078	1.35788
28.5476	0.947453	0.661078	1.35788
19.5975	1.45128	1.17793	1.78807
17.3607	1.63188	1.30113	2.0467
28.4654	0.950529	0.664509	1.35966
19.258	1.47868	1.19912	1.82341
24.2546	1.14615	0.883282	1.48725
28.4654	0.950529	0.664509	1.35966
15.3402	1.8028	1.39458	2.33051
25.4209	1.08386	0.814279	1.4427
15.8932	1.75543	1.36968	2.24983
28.4654	0.950529	0.664509	1.35966
28.4654	0.950529	0.664509	1.35966
28.4654	0.950529	0.664509	1.35966
28.4654	0.950529	0.664509	1.35966
28.4654	0.950529	0.664509	1.35966
28.4654	0.950529	0.664509	1.35966
28.4654	0.950529	0.664509	1.35966
28.4654	0.950529	0.664509	1.35966
14.2998	1.88951	1.43961	2.48
8.59138	1.90195	1.49834	2.41427
8.59138	1.90195	1.49834	2.41427
19.6112	1.4502	1.17707	1.7867
28.3806	0.953733	0.668087	1.36151
28.3806	0.953733	0.668087	1.36151
28.3806	0.953733	0.668087	1.36151
28.3806	0.953733	0.668087	1.36151
28.3806	0.953733	0.668087	1.36151
28.2984	0.956859	0.671581	1.36332
28.2984	0.956859	0.671581	1.36332
28.2984	0.956859	0.671581	1.36332
28.2984	0.956859	0.671581	1.36332
0.279261	1.17159	0.564516	2.43149
28.2984	0.956859	0.671581	1.36332
39.7098	0.697493	0.5	1.20787
29.6591	0.908204	0.617577	1.3356
38.1903	0.717424	0.5	1.22233
13.2457	1.96698	1.48138	2.61176
39.7098	0.697493	0.5	1.20787
25.0459	1.10317	0.83582	1.45604
28.2136	0.960117	0.675224	1.36521
28.2136	0.960117	0.675224	1.36521
28.2136	0.960117	0.675224	1.36521
28.2136	0.960117	0.675224	1.36521
28.2136	0.960117	0.675224	1.36521
28.2136	0.960117	0.675224	1.36521
23.9206	1.16499	0.903802	1.50165
27.0253	1.00869	0.729783	1.3942
28.2136	0.960117	0.675224	1.36521
28.2136	0.960117	0.675224	1.36521
28.2136	0.960117	0.675224	1.36521
28.2136	0.960117	0.675224	1.36521
28.2136	0.960117	0.675224	1.36521
28.2136	0.960117	0.675224	1.36521
28.2136	0.960117	0.675224	1.36521
28.2136	0.960117	0.675224	1.36521
28.2136	0.960117	0.675224	1.36521
2.17112	1.26898	0.852155	1.8897
28.1287	0.963402	0.6789	1.36713
28.1287	0.963402	0.6789	1.36713
28.1287	0.963402	0.6789	1.36713
28.1287	0.963402	0.6789	1.36713
21.3771	1.32175	1.06461	1.641
0.0848734	1.37585	0.5	4.76774
20.6626	1.37123	1.11038	1.69337
27.8795	0.973204	0.689885	1.37288
27.8795	0.973204	0.689885	1.37288
27.8795	0.973204	0.689885	1.37288
27.8795	0.973204	0.689885	1.37288
27.8795	0.973204	0.689885	1.37288
20.3285	1.39544	1.13168	1.72067
27.6331	0.983138	0.701036	1.37876
27.6331	0.983138	0.701036	1.37876
27.6331	0.983138	0.701036	1.37876
27.6331	0.983138	0.701036	1.37876
2.34086	1.28649	0.872762	1.89636
39.6331	0.698463	0.5	1.20858
39.6331	0.698463	0.5	1.20858
30.5216	0.880607	0.5874	1.32017
39.6331	0.698463	0.5	1.20858
39.6331	0.698463	0.5	1.20858
39.6331	0.698463	0.5	1.20858
27.6331	0.983138	0.701036	1.37876
27.6331	0.983138	0.701036	1.37876
27.6331	0.983138	0.701036	1.37876
0.0821355	1.38408	0.5	4.88417
27.6331	0.983138	0.701036	1.37876
27.6331	0.983138	0.701036	1.37876
27.5483	0.986616	0.704944	1.38083
27.5483	0.986616	0.704944	1.38083
20.1314	1.41009	1.14421	1.73775
27.5483	0.986616	0.704944	1.38083
27.5483	0.986616	0.704944	1.38083
27.5483	0.986616	0.704944	1.38083
19.4223	1.46533	1.18892	1.80601
21.5222	1.31205	1.05531	1.63125
27.4661	0.990009	0.708758	1.38287
27.4661	0.990009	0.708758	1.38287
27.4661	0.990009	0.708758	1.38287
27.4661	0.990009	0.708758	1.38287
27.3812	0.993544	0.712734	1.38499
27.3812	0.993544	0.712734	1.38499
27.3812	0.993544	0.712734	1.38499
27.3812	0.993544	0.712734	1.38499
27.3812	0.993544	0.712734	1.38499
27.3812	0.993544	0.712734	1.38499
27.2991	0.996994	0.716614	1.38707
27.2991	0.996994	0.716614	1.38707
17.6044	1.61204	1.28938	2.01546
27.2991	0.996994	0.716614	1.38707
27.2991	0.996994	0.716614	1.38707
27.2991	0.996994	0.716614	1.38707
27.2142	1.00059	0.720658	1.38925
21.2704	1.32896	1.07146	1.64835
27.2142	1.00059	0.720658	1.38925
19.0034	1.49931	1.21446	1.85096
27.2142	1.00059	0.720658	1.38925
27.2142	1.00059	0.720658	1.38925
27.2142	1.00059	0.720658	1.38925
17.514	1.61937	1.29375	2.02694
23.54	1.18688	0.927392	1.51898
27.2142	1.00059	0.720658	1.38925
27.2142	1.00059	0.720658	1.38925
27.2142	1.00059	0.720658	1.38925
27.2142	1.00059	0.720658	1.38925
22.5626	1.24543	0.988883	1.56854
16.0876	1.73879	1.3608	2.22178
27.2142	1.00059	0.720658	1.38925
26.6694	1.02438	0.747446	1.40391
27.2142	1.00059	0.720658	1.38925
29.2101	0.923539	0.634502	1.34424
39.6331	0.698463	0.5	1.20858
29.4209	0.916254	0.626449	1.34013
32.1424	0.834775	0.538294	1.29455
39.6331	0.698463	0.5	1.20858
39.6331	0.698463	0.5	1.20858
20.5777	1.37731	1.1158	1.70012
28.5941	0.945722	0.659147	1.35689
31.7098	0.846285	0.550491	1.30102
22.3573	1.2582	1.00194	1.58001
31.7098	0.846285	0.550491	1.30102
31.7098	0.846285	0.550491	1.30102
26.6338	1.02598	0.749246	1.40491
26.6338	1.02598	0.749246	1.40491
26.6338	1.02598	0.749246	1.40491
26.6338	1.02598	0.749246	1.40491
26.6338	1.02598	0.749246	1.40491
26.6338	1.02598	0.749246	1.40491
25.922	1.05913	0.78655	1.42617
26.6338	1.02598	0.749246	1.40491
26.6338	1.02598	0.749246	1.40491
20.9254	1.35269	1.09356	1.67321
26.6338	1.02598	0.749246	1.40491
26.6338	1.02598	0.749246	1.40491
26.5489	1.02981	0.753564	1.40732
26.5489	1.02981	0.753564	1.40732
26.5489	1.02981	0.753564	1.40732
26.5489	1.02981	0.753564	1.40732
26.5489	1.02981	0.753564	1.40732
26.5489	1.02981	0.753564	1.40732
26.5489	1.02981	0.753564	1.40732
26.5489	1.02981	0.753564	1.40732
26.5489	1.02981	0.753564	1.40732
26.5489	1.02981	0.753564	1.40732
26.5489	1.02981	0.753564	1.40732
26.5489	1.02981	0.753564	1.40732
26.3819	1.03745	0.762163	1.41216
26.3819	1.03745	0.762163	1.41216
26.3819	1.03745	0.762163	1.41216
26.3819	1.03745	0.762163	1.41216
26.3819	1.03745	0.762163	1.41216
13.9192	1.91924	1.45526	2.53115
26.2998	1.04125	0.766442	1.41458
26.2998	1.04125	0.766442	1.41458
17.3908	1.62941	1.29968	2.04279
26.2998	1.04125	0.766442	1.41458
26.2998	1.04125	0.766442	1.41458
26.2998	1.04125	0.766442	1.41458
26.2998	1.04125	0.766442	1.41458
0.17796	1.22745	0.504757	2.98486
20.1314	1.41009	1.14421	1.73775
4.71732	1.52626	1.15766	2.01222
26.2998	1.04125	0.766442	1.41458
26.2998	1.04125	0.766442	1.41458
39.6331	0.698463	0.5	1.20858
39.6331	0.698463	0.5	1.20858
39.6331	0.698463	0.5	1.20858
39.6331	0.698463	0.5	1.20858
39.6331	0.698463	0.5	1.20858
39.6331	0.698463	0.5	1.20858
31.5483	0.850714	0.555209	1.3035
31.5483	0.850714	0.555209	1.3035
31.5483	0.850714	0.555209	1.3035
31.5483	0.850714	0.555209	1.3035
31.5483	0.850714	0.555209	1.3035
31.5483	0.850714	0.555209	1.3035
0.0930869	1.35342	0.5	4.46079
20.0465	1.41649	1.14959	1.74534
18.3956	1.5483	1.24885	1.91957
0.0930869	1.35342	0.5	4.46079
26.2149	1.04521	0.770899	1.41712
26.2149	1.04521	0.770899	1.41712
26.2149	1.04521	0.770899	1.41712
26.2149	1.04521	0.770899	1.41712
24.6708	1.12318	0.85801	1.4703
26.2149	1.04521	0.770899	1.41712
26.2149	1.04521	0.770899	1.41712
26.2149	1.04521	0.770899	1.41712
26.13	1.0492	0.77539	1.4197
26.13	1.0492	0.77539	1.4197
26.13	1.0492	0.77539	1.4197
26.13	1.0492	0.77539	1.4197
26.13	1.0492	0.77539	1.4197
26.13	1.0492	0.77539	1.4197
26.0479	1.0531	0.77977	1.42223
17.64	1.60916	1.28764	2.01096
26.0479	1.0531	0.77977	1.42223
26.0479	1.0531	0.77977	1.42223
15.551	1.78476	1.38515	2.29966
26.0479	1.0531	0.77977	1.42223
11.8741	2.0312	1.52504	2.70535
23.6687	1.17943	0.919391	1.51301
26.0479	1.0531	0.77977	1.42223
26.0479	1.0531	0.77977	1.42223
26.0479	1.0531	0.77977	1.42223
26.0479	1.0531	0.77977	1.42223
25.3361	1.08817	0.819095	1.44564
25.963	1.05715	0.78433	1.42488
25.963	1.05715	0.78433	1.42488
5.10883	1.56437	1.20167	2.03654
25.963	1.05715	0.78433	1.42488
25.963	1.05715	0.78433	1.42488
25.963	1.05715	0.78433	1.42488
25.963	1.05715	0.78433	1.42488
12.2519	2.01933	1.5147	2.69209
21.7632	1.29618	1.03988	1.61565
11.5838	2.03655	1.53181	2.7076
25.963	1.05715	0.78433	1.42488
19.7947	1.4358	1.16552	1.76876
14.6585	1.86028	1.42442	2.42952
25.963	1.05715	0.78433	1.42488
25.963	1.05715	0.78433	1.42488
25.963	1.05715	0.78433	1.42488
25.963	1.05715	0.78433	1.42488
20.3833	1.39142	1.1282	1.71606
25.963	1.05715	0.78433	1.42488
25.963	1.05715	0.78433	1.42488
19.154	1.48712	1.20546	1.83458
0.613279	1.13594	0.653083	1.97579
25.963	1.05715	0.78433	1.42488
25.963	1.05715	0.78433	1.42488
25.963	1.05715	0.78433	1.42488
25.963	1.05715	0.78433	1.42488
25.963	1.05715	0.78433	1.42488
25.963	1.05715	0.78433	1.42488
25.963	1.05715	0.78433	1.42488
40.794	0.684122	0.5	1.19806
40.794	0.684122	0.5	1.19806
23.9042	1.16592	0.904816	1.50238
40.794	0.684122	0.5	1.19806
39.9206	0.694845	0.5	1.20594
40.794	0.684122	0.5	1.19806
12.668	2.00069	1.50168	2.66554
40.794	0.684122	0.5	1.19806
17.6674	1.60695	1.28631	2.00752
40.794	0.684122	0.5	1.19806
40.794	0.684122	0.5	1.19806
21.4976	1.31369	1.05689	1.63289
25.8809	1.06111	0.788777	1.42747
21.5031	1.31333	1.05654	1.63252
25.8809	1.06111	0.788777	1.42747
25.8809	1.06111	0.788777	1.42747
21.5031	1.31333	1.05654	1.63252
0.429843	1.14216	0.614934	2.1214
17.3361	1.6339	1.30231	2.04991
20.7967	1.36171	1.1018	1.68294
25.8809	1.06111	0.788777	1.42747
21.5031	1.31333	1.05654	1.63252
25.8809	1.06111	0.788777	1.42747
25.8809	1.06111	0.788777	1.42747
25.7112	1.06939	0.79807	1.43296
25.7112	1.06939	0.79807	1.43296
25.7112	1.06939	0.79807	1.43296
25.7112	1.06939	0.79807	1.43296
15.1704	1.81726	1.40211	2.35534
25.7112	1.06939	0.79807	1.43296
25.6318	1.07331	0.802465	1.43557
25.6318	1.07331	0.802465	1.43557
25.6318	1.07331	0.802465	1.43557
18.2587	1.55932	1.25618	1.9356
25.6318	1.07331	0.802465	1.43557
25.6318	1.07331	0.802465	1.43557
25.4648	1.08165	0.811807	1.4412
25.4648	1.08165	0.811807	1.4412
25.4648	1.08165	0.811807	1.4412
25.4648	1.08165	0.811807	1.4412
9.42094	1.97084	1.53151	2.53619
20.616	1.37456	1.11335	1.69706
25.4648	1.08165	0.811807	1.4412
25.4648	1.08165	0.811807	1.4412
10.6667	2.02923	1.54411	2.66676
25.4648	1.08165	0.811807	1.4412
21.0869	1.34149	1.08322	1.66135
14.924	1.83811	1.41293	2.39124
15.258	1.8098	1.39823	2.34253
25.3799	1.08594	0.816605	1.44412
20.6927	1.36909	1.10845	1.691
25.3799	1.08594	0.816605	1.44412
25.3799	1.08594	0.816605	1.44412
25.3799	1.08594	0.816605	1.44412
29.2101	0.923539	0.634502	1.34424
34.6092	0.777967	0.5	1.26161
1.77413	1.22833	0.80411	1.87634
39.6331	0.698463	0.5	1.20858
39.6331	0.698463	0.5	1.20858
39.6331	0.698463	0.5	1.20858
25.3799	1.08594	0.816605	1.44412
25.3799	1.08594	0.816605	1.44412
25.3799	1.08594	0.816605	1.44412
25.3799	1.08594	0.816605	1.44412
4.91718	1.54576	1.18031	2.02436
25.358	1.08706	0.817849	1.44488
24.7502	1.11889	0.85326	1.4672
25.2129	1.09449	0.826147	1.44999
25.2129	1.09449	0.826147	1.44999
25.2129	1.09449	0.826147	1.44999
25.2129	1.09449	0.826147	1.44999
25.2129	1.09449	0.826147	1.44999
25.128	1.09889	0.831047	1.45305
25.128	1.09889	0.831047	1.45305
19.1376	1.48845	1.20645	1.83636
25.128	1.09889	0.831047	1.45305
25.128	1.09889	0.831047	1.45305
20.679	1.37006	1.10933	1.69208
20.0493	1.41628	1.14942	1.7451
18.2779	1.55777	1.25516	1.93334
25.128	1.09889	0.831047	1.45305
25.128	1.09889	0.831047	1.45305
25.128	1.09889	0.831047	1.45305
25.128	1.09889	0.831047	1.45305
25.0459	1.10317	0.83582	1.45604
25.0459	1.10317	0.83582	1.45604
25.0459	1.10317	0.83582	1.45604
25.0459	1.10317	0.83582	1.45604
13.0376	1.98004	1.48895	2.6331
25.0459	1.10317	0.83582	1.45604
24.4983	1.13262	0.868426	1.47719
24.961	1.10764	0.840785	1.45919
24.961	1.10764	0.840785	1.45919
24.961	1.10764	0.840785	1.45919
7.08556	1.75445	1.39448	2.20734
24.961	1.10764	0.840785	1.45919
13.0842	1.9772	1.48728	2.6285
39.5483	0.699539	0.5	1.20937
39.5483	0.699539	0.5	1.20937
39.5483	0.699539	0.5	1.20937
39.5483	0.699539	0.5	1.20937
33.2293	0.80798	0.510309	1.27929
17.7823	1.59767	1.28064	1.99317
28.794	0.938376	0.650967	1.35268
28.794	0.938376	0.650967	1.35268
22.0999	1.27446	1.01835	1.59498
28.794	0.938376	0.650967	1.35268
28.794	0.938376	0.650967	1.35268
24.8789	1.11199	0.845621	1.46227
24.8789	1.11199	0.845621	1.46227
24.8789	1.11199	0.845621	1.46227
17.6756	1.60629	1.28591	2.00649
24.4162	1.13716	0.873423	1.48054
24.8789	1.11199	0.845621	1.46227
24.8789	1.11199	0.845621	1.46227
24.8789	1.11199	0.845621	1.46227
24.8789	1.11199	0.845621	1.46227
24.8789	1.11199	0.845621	1.46227
24.8789	1.11199	0.845621	1.46227
24.8789	1.11199	0.845621	1.46227
24.8789	1.11199	0.845621	1.46227
24.8789	1.11199	0.845621	1.46227
13.3689	1.95883	1.47678	2.59823
24.8789	1.11199	0.845621	1.46227
24.8789	1.11199	0.845621	1.46227
24.8789	1.11199	0.845621	1.46227
21.2457	1.33064	1.07304	1.65007
18.026	1.57804	1.26833	1.96336
24.7091	1.1211	0.855714	1.4688
24.7091	1.1211	0.855714	1.4688
24.7091	1.1211	0.855714	1.4688
24.7091	1.1211	0.855714	1.4688
24.7091	1.1211	0.855714	1.4688
24.7091	1.1211	0.855714	1.4688
24.7091	1.1211	0.855714	1.4688
24.7091	1.1211	0.855714	1.4688
24.7091	1.1211	0.855714	1.4688
24.7091	1.1211	0.855714	1.4688
24.7091	1.1211	0.855714	1.4688
24.7091	1.1211	0.855714	1.4688
14.2642	1.89235	1.4411	2.48491
24.7091	1.1211	0.855714	1.4688
24.7091	1.1211	0.855714	1.4688
24.7091	1.1211	0.855714	1.4688
24.7091	1.1211	0.855714	1.4688
24.7091	1.1211	0.855714	1.4688
24.7091	1.1211	0.855714	1.4688
24.7091	1.1211	0.855714	1.4688
19.7673	1.43793	1.16725	1.77139
24.7091	1.1211	0.855714	1.4688
24.6324	1.12526	0.860314	1.47181
24.6324	1.12526	0.860314	1.47181
24.6324	1.12526	0.860314	1.47181
24.6324	1.12526	0.860314	1.47181
17.6537	1.60806	1.28698	2.00924
24.6324	1.12526	0.860314	1.47181
2.32991	1.28536	0.871432	1.89592
28.794	0.938376	0.650967	1.35268
20.7502	1.365	1.10478	1.68653
28.794	0.938376	0.650967	1.35268
28.794	0.938376	0.650967	1.35268
0.501027	1.13743	0.631552	2.04853
24.5476	1.12991	0.865437	1.4752
24.5476	1.12991	0.865437	1.4752
11.9973	2.02791	1.52184	2.70226
24.5476	1.12991	0.865437	1.4752
24.5476	1.12991	0.865437	1.4752
24.5476	1.12991	0.865437	1.4752
13.5305	1.94771	1.47062	2.57959
24.3806	1.13914	0.875592	1.482
24.3806	1.13914	0.875592	1.482
24.3806	1.13914	0.875592	1.482
17.5113	1.61959	1.29388	2.02729
2.59822	1.31305	0.904069	1.90704
24.3806	1.13914	0.875592	1.482
24.3806	1.13914	0.875592	1.482
0.40794	1.14446	0.609141	2.15023
24.3806	1.13914	0.875592	1.482
17.5113	1.61959	1.29388	2.02729
2.59822	1.31305	0.904069	1.90704
24.2984	1.14371	0.880604	1.48541
24.2984	1.14371	0.880604	1.48541
24.2984	1.14371	0.880604	1.48541
6.92129	1.73854	1.38067	2.18919
24.2984	1.14371	0.880604	1.48541
24.2984	1.14371	0.880604	1.48541
24.2136	1.14845	0.885795	1.48898
24.2136	1.14845	0.885795	1.48898
24.2136	1.14845	0.885795	1.48898
17.6044	1.61204	1.28938	2.01546
24.2136	1.14845	0.885795	1.48898
24.2136	1.14845	0.885795	1.48898
24.2136	1.14845	0.885795	1.48898
24.2136	1.14845	0.885795	1.48898
24.2136	1.14845	0.885795	1.48898
24.2136	1.14845	0.885795	1.48898
24.2136	1.14845	0.885795	1.48898
24.2136	1.14845	0.885795	1.48898
24.1287	1.15321	0.890998	1.4926
24.1287	1.15321	0.890998	1.4926
24.1287	1.15321	0.890998	1.4926
19.4305	1.46467	1.18841	1.80515
16.4928	1.70428	1.3421	2.16421
24.1287	1.15321	0.890998	1.4926
0.50924	1.13711	0.633292	2.04175
24.1287	1.15321	0.890998	1.4926
18.037	1.57716	1.26777	1.96204
24.1287	1.15321	0.890998	1.4926
14.3792	1.88313	1.43629	2.46898
24.1287	1.15321	0.890998	1.4926
24.1287	1.15321	0.890998	1.4926
24.1287	1.15321	0.890998	1.4926
24.1287	1.15321	0.890998	1.4926
24.1287	1.15321	0.890998	1.4926
24.1287	1.15321	0.890998	1.4926
24.1287	1.15321	0.890998	1.4926
12.2355	2.01995	1.51518	2.6929
24.1287	1.15321	0.890998	1.4926
12.501	2.00881	1.50708	2.67758
24.1287	1.15321	0.890998	1.4926
14.3792	1.88313	1.43629	2.46898
24.1287	1.15321	0.890998	1.4926
28.7091	0.941478	0.654419	1.35445
28.7091	0.941478	0.654419	1.35445
28.7091	0.941478	0.654419	1.35445
28.7091	0.941478	0.654419	1.35445
20.3915	1.39082	1.12767	1.71537
28.7091	0.941478	0.654419	1.35445
24.0465	1.15785	0.896044	1.49614
24.0465	1.15785	0.896044	1.49614
24.0465	1.15785	0.896044	1.49614
24.0465	1.15785	0.896044	1.49614
24.0465	1.15785	0.896044	1.49614
24.0465	1.15785	0.896044	1.49614
24.0465	1.15785	0.896044	1.49614
24.0465	1.15785	0.896044	1.49614
24.0465	1.15785	0.896044	1.49614
24.0465	1.15785	0.896044	1.49614
24.0465	1.15785	0.896044	1.49614
8.66804	1.90935	1.50242	2.42651
23.9617	1.16265	0.901269	1.49984
17.2731	1.63907	1.30533	2.05814
0.342231	1.15477	0.589087	2.26366
23.9617	1.16265	0.901269	1.49984
23.9617	1.16265	0.901269	1.49984
23.9617	1.16265	0.901269	1.49984
23.9617	1.16265	0.901269	1.49984
23.9617	1.16265	0.901269	1.49984
23.9617	1.16265	0.901269	1.49984
6.6694	1.71422	1.3586	2.16292
23.9617	1.16265	0.901269	1.49984
23.9617	1.16265	0.901269	1.49984
23.9617	1.16265	0.901269	1.49984
23.9617	1.16265	0.901269	1.49984
23.9617	1.16265	0.901269	1.49984
16.1314	1.73504	1.35879	2.21549
23.9617	1.16265	0.901269	1.49984
23.9617	1.16265	0.901269	1.49984
23.8795	1.16733	0.906337	1.50348
23.8795	1.16733	0.906337	1.50348
23.8795	1.16733	0.906337	1.50348
23.8795	1.16733	0.906337	1.50348
23.8795	1.16733	0.906337	1.50348
23.8795	1.16733	0.906337	1.50348
23.8795	1.16733	0.906337	1.50348
23.8795	1.16733	0.906337	1.50348
23.8795	1.16733	0.906337	1.50348
23.8795	1.16733	0.906337	1.50348
23.8795	1.16733	0.906337	1.50348
23.8795	1.16733	0.906337	1.50348
23.7947	1.17218	0.911584	1.50728
23.7947	1.17218	0.911584	1.50728
23.7947	1.17218	0.911584	1.50728
23.7947	1.17218	0.911584	1.50728
23.7947	1.17218	0.911584	1.50728
23.7947	1.17218	0.911584	1.50728
39.4661	0.700585	0.5	1.21013
39.4661	0.700585	0.5	1.21013
27.3402	0.995266	0.71467	1.38603
26.7543	1.02059	0.743178	1.40155
39.4661	0.700585	0.5	1.21013
39.4661	0.700585	0.5	1.21013
24.5503	1.12976	0.865271	1.47509
28.6324	0.944302	0.657565	1.35607
28.6324	0.944302	0.657565	1.35607
28.6324	0.944302	0.657565	1.35607
28.6324	0.944302	0.657565	1.35607
20.2546	1.4009	1.13639	1.72699
23.7947	1.17218	0.911584	1.50728
23.7947	1.17218	0.911584	1.50728
23.7947	1.17218	0.911584	1.50728
23.7947	1.17218	0.911584	1.50728
23.7947	1.17218	0.911584	1.50728
23.7947	1.17218	0.911584	1.50728
23.6331	1.18148	0.921602	1.51465
23.6331	1.18148	0.921602	1.51465
23.6331	1.18148	0.921602	1.51465
23.6331	1.18148	0.921602	1.51465
23.6331	1.18148	0.921602	1.51465
23.6331	1.18148	0.921602	1.51465
23.4661	1.19119	0.931999	1.52246
23.4661	1.19119	0.931999	1.52246
23.4661	1.19119	0.931999	1.52246
8.42163	1.88516	1.48871	2.38719
23.4661	1.19119	0.931999	1.52246
23.4661	1.19119	0.931999	1.52246
23.2991	1.20099	0.942436	1.53048
23.2991	1.20099	0.942436	1.53048
23.2991	1.20099	0.942436	1.53048
23.2991	1.20099	0.942436	1.53048
16.2437	1.72546	1.35363	2.19944
23.2991	1.20099	0.942436	1.53048
23.2991	1.20099	0.942436	1.53048
1.84257	1.23528	0.812381	1.87833
23.2991	1.20099	0.942436	1.53048
23.2991	1.20099	0.942436	1.53048
23.2991	1.20099	0.942436	1.53048
23.2991	1.20099	0.942436	1.53048
23.2142	1.20601	0.947755	1.53464
14.5544	1.86886	1.42887	2.44433
23.2142	1.20601	0.947755	1.53464
15.2882	1.80724	1.39689	2.33812
23.2142	1.20601	0.947755	1.53464
23.2142	1.20601	0.947755	1.53464
23.1294	1.21105	0.953083	1.53885
23.1294	1.21105	0.953083	1.53885
21.8371	1.29137	1.03515	1.611
23.1294	1.21105	0.953083	1.53885
23.1294	1.21105	0.953083	1.53885
23.1294	1.21105	0.953083	1.53885
23.1294	1.21105	0.953083	1.53885
23.1294	1.21105	0.953083	1.53885
0.123203	1.29223	0.5	3.69502
23.1294	1.21105	0.953083	1.53885
23.1294	1.21105	0.953083	1.53885
23.1294	1.21105	0.953083	1.53885
39.4661	0.700585	0.5	1.21013
39.4661	0.700585	0.5	1.21013
36.6379	0.740909	0.5	1.23835
39.4661	0.700585	0.5	1.21013
34.5654	0.778856	0.5	1.26215
39.4661	0.700585	0.5	1.21013
12.3368	2.01597	1.51217	2.68763
28.5476	0.947453	0.661078	1.35788
28.5476	0.947453	0.661078	1.35788
15.9179	1.75332	1.36855	2.24626
0.325804	1.15836	0.583283	2.30042
28.5476	0.947453	0.661078	1.35788
23.0472	1.21596	0.958248	1.54299
23.0472	1.21596	0.958248	1.54299
23.0472	1.21596	0.958248	1.54299
23.0472	1.21596	0.958248	1.54299
13.4921	1.95039	1.47209	2.5841
23.0472	1.21596	0.958248	1.54299
23.0472	1.21596	0.958248	1.54299
23.0472	1.21596	0.958248	1.54299
17.0979	1.65354	1.31368	2.08132
23.0472	1.21596	0.958248	1.54299
23.0472	1.21596	0.958248	1.54299
23.0472	1.21596	0.958248	1.54299
21.755	1.29672	1.04041	1.61617
23.0472	1.21596	0.958248	1.54299
23.0472	1.21596	0.958248	1.54299
23.0472	1.21596	0.958248	1.54299
23.0472	1.21596	0.958248	1.54299
23.0472	1.21596	0.958248	1.54299
21.6701	1.30228	1.04584	1.62159
22.9624	1.22106	0.963594	1.54732
10.0726	2.00796	1.54289	2.61321
22.9624	1.22106	0.963594	1.54732
22.9624	1.22106	0.963594	1.54732
22.9624	1.22106	0.963594	1.54732
22.9624	1.22106	0.963594	1.54732
22.9624	1.22106	0.963594	1.54732
22.9624	1.22106	0.963594	1.54732
10.1875	2.013	1.54376	2.62487
22.9624	1.22106	0.963594	1.54732
22.9624	1.22106	0.963594	1.54732
22.8802	1.22602	0.968776	1.55156
22.8802	1.22602	0.968776	1.55156
22.8802	1.22602	0.968776	1.55156
22.8802	1.22602	0.968776	1.55156
22.8802	1.22602	0.968776	1.55156
21.7139	1.2994	1.04303	1.61878
22.8802	1.22602	0.968776	1.55156
22.8802	1.22602	0.968776	1.55156
22.8802	1.22602	0.968776	1.55156
21.588	1.30769	1.0511	1.62692
22.8802	1.22602	0.968776	1.55156
22.8802	1.22602	0.968776	1.55156
22.8802	1.22602	0.968776	1.55156
22.8802	1.22602	0.968776	1.55156
22.8802	1.22602	0.968776	1.55156
22.8802	1.22602	0.968776	1.55156
22.8802	1.22602	0.968776	1.55156
22.8802	1.22602	0.968776	1.55156
22.7953	1.23117	0.974138	1.55601
22.7953	1.23117	0.974138	1.55601
22.7953	1.23117	0.974138	1.55601
22.7953	1.23117	0.974138	1.55601
22.7953	1.23117	0.974138	1.55601
20.835	1.35901	1.09935	1.68001
22.7953	1.23117	0.974138	1.55601
19.165	1.48623	1.2048	1.8334
20.063	1.41525	1.14855	1.74386
11.4141	2.03802	1.53522	2.70549
22.7953	1.23117	0.974138	1.55601
22.7953	1.23117	0.974138	1.55601
39.4661	0.700585	0.5	1.21013
39.4661	0.700585	0.5	1.21013
8.23546	1.86679	1.47755	2.35858
39.4661	0.700585	0.5	1.21013
39.4661	0.700585	0.5	1.21013
29.0869	0.927868	0.639298	1.3467
23.9644	1.1625	0.901101	1.49972
28.0465	0.966607	0.682489	1.369
28.0465	0.966607	0.682489	1.369
28.0465	0.966607	0.682489	1.369
0.925394	1.15042	0.699387	1.89231
19.6687	1.44565	1.17346	1.78099
22.7105	1.23634	0.979509	1.56052
15.5127	1.78805	1.38687	2.30527
22.7105	1.23634	0.979509	1.56052
22.7105	1.23634	0.979509	1.56052
22.7105	1.23634	0.979509	1.56052
22.7105	1.23634	0.979509	1.56052
22.6338	1.24105	0.984367	1.56465
10.319	2.01821	1.54437	2.63744
22.6338	1.24105	0.984367	1.56465
10.319	2.01821	1.54437	2.63744
22.6338	1.24105	0.984367	1.56465
14.0945	1.90575	1.44812	2.50798
18.9185	1.50617	1.21945	1.8603
22.5489	1.24628	0.989752	1.56929
22.5489	1.24628	0.989752	1.56929
22.5489	1.24628	0.989752	1.56929
22.5489	1.24628	0.989752	1.56929
22.5489	1.24628	0.989752	1.56929
22.5489	1.24628	0.989752	1.56929
22.5489	1.24628	0.989752	1.56929
22.5489	1.24628	0.989752	1.56929
22.5489	1.24628	0.989752	1.56929
22.5489	1.24628	0.989752	1.56929
10.2286	2.01469	1.544	2.62888
22.4668	1.25137	0.99497	1.57384
1.44559	1.19567	0.764376	1.87031
22.4668	1.25137	0.99497	1.57384
22.4668	1.25137	0.99497	1.57384
22.4668	1.25137	0.99497	1.57384
22.4668	1.25137	0.99497	1.57384
22.4668	1.25137	0.99497	1.57384
18.8364	1.5128	1.22421	1.86941
22.4668	1.25137	0.99497	1.57384
19.7344	1.4405	1.16932	1.77456
22.4668	1.25137	0.99497	1.57384
22.4668	1.25137	0.99497	1.57384
22.4668	1.25137	0.99497	1.57384
22.4668	1.25137	0.99497	1.57384
22.4668	1.25137	0.99497	1.57384
22.4668	1.25137	0.99497	1.57384
22.4668	1.25137	0.99497	1.57384
22.4668	1.25137	0.99497	1.57384
0.919918	1.15003	0.698659	1.89302
22.3819	1.25666	1.00037	1.57861
22.3819	1.25666	1.00037	1.57861
22.3819	1.25666	1.00037	1.57861
16.6489	1.69109	1.33483	2.14244
22.3819	1.25666	1.00037	1.57861
22.3819	1.25666	1.00037	1.57861
19.0034	1.49931	1.21446	1.85096
22.3819	1.25666	1.00037	1.57861
22.3819	1.25666	1.00037	1.57861
17.2348	1.64222	1.30716	2.06317
22.3819	1.25666	1.00037	1.57861
31.9754	0.839159	0.542928	1.29702
39.4661	0.700585	0.5	1.21013
39.4661	0.700585	0.5	1.21013
39.4661	0.700585	0.5	1.21013
39.4661	0.700585	0.5	1.21013
39.4661	0.700585	0.5	1.21013
27.8795	0.973204	0.689885	1.37288
23.7974	1.17202	0.911415	1.50715
27.8795	0.973204	0.689885	1.37288
19.5017	1.45893	1.18395	1.79779
27.8795	0.973204	0.689885	1.37288
27.8795	0.973204	0.689885	1.37288
22.3819	1.25666	1.00037	1.57861
17.2183	1.64358	1.30794	2.06534
18.026	1.57804	1.26833	1.96336
22.3819	1.25666	1.00037	1.57861
22.3819	1.25666	1.00037	1.57861
18.3381	1.55293	1.25195	1.92627
22.3819	1.25666	1.00037	1.57861
22.3819	1.25666	1.00037	1.57861
10.7515	2.03131	1.54365	2.67302
22.3819	1.25666	1.00037	1.57861
22.3819	1.25666	1.00037	1.57861
3.91786	1.44721	1.064	1.96843
22.3819	1.25666	1.00037	1.57861
19.0034	1.49931	1.21446	1.85096
10.5955	2.0273	1.54438	2.66123
22.3819	1.25666	1.00037	1.57861
22.3819	1.25666	1.00037	1.57861
0.123203	1.29223	0.5	3.69502
22.3819	1.25666	1.00037	1.57861
15.2334	1.8119	1.39932	2.34613
22.3819	1.25666	1.00037	1.57861
22.3819	1.25666	1.00037	1.57861
22.0068	1.28041	1.02429	1.60057
15.7098	1.77115	1.378	2.27649
22.2998	1.26181	1.0056	1.5833
19.5674	1.45368	1.17982	1.7911
6.62834	1.71026	1.35491	2.15881
22.2998	1.26181	1.0056	1.5833
22.2998	1.26181	1.0056	1.5833
22.2998	1.26181	1.0056	1.5833
22.2998	1.26181	1.0056	1.5833
19.9699	1.42231	1.15445	1.75233
22.2998	1.26181	1.0056	1.5833
22.2998	1.26181	1.0056	1.5833
22.2998	1.26181	1.0056	1.5833
22.2998	1.26181	1.0056	1.5833
22.2149	1.26716	1.01101	1.58821
22.2149	1.26716	1.01101	1.58821
13.9165	1.91945	1.45537	2.53151
22.2149	1.26716	1.01101	1.58821
1.34155	1.18572	0.751723	1.8703
22.2149	1.26716	1.01101	1.58821
21.0541	1.34376	1.08532	1.66373
22.13	1.27254	1.01642	1.59319
9.44559	1.97251	1.53215	2.53943
22.13	1.27254	1.01642	1.59319
22.13	1.27254	1.01642	1.59319
22.13	1.27254	1.01642	1.59319
22.13	1.27254	1.01642	1.59319
22.13	1.27254	1.01642	1.59319
3.44148	1.39928	1.00665	1.94506
22.13	1.27254	1.01642	1.59319
22.13	1.27254	1.01642	1.59319
22.13	1.27254	1.01642	1.59319
39.3812	0.70167	0.5	1.21093
39.3812	0.70167	0.5	1.21093
39.3812	0.70167	0.5	1.21093
39.3812	0.70167	0.5	1.21093
21.3361	1.32452	1.06725	1.64381
39.3812	0.70167	0.5	1.21093
22.13	1.27254	1.01642	1.59319
22.13	1.27254	1.01642	1.59319
22.13	1.27254	1.01642	1.59319
22.13	1.27254	1.01642	1.59319
22.13	1.27254	1.01642	1.59319
22.13	1.27254	1.01642	1.59319
22.13	1.27254	1.01642	1.59319
9.44559	1.97251	1.53215	2.53943
22.13	1.27254	1.01642	1.59319
22.13	1.27254	1.01642	1.59319
21.0541	1.34376	1.08532	1.66373
8.66804	1.90935	1.50242	2.42651
16.2053	1.72873	1.35539	2.20491
19.3155	1.47401	1.19558	1.81728
18.1793	1.5657	1.26037	1.945
22.0479	1.27778	1.02167	1.59809
22.0479	1.27778	1.02167	1.59809
22.0479	1.27778	1.02167	1.59809
5.01848	1.55561	1.19165	2.03073
21.963	1.28322	1.02709	1.60323
17.9658	1.58288	1.27141	1.97066
21.963	1.28322	1.02709	1.60323
9.27858	1.96076	1.52742	2.51703
10.371	2.02012	1.5445	2.6422
21.963	1.28322	1.02709	1.60323
21.963	1.28322	1.02709	1.60323
21.963	1.28322	1.02709	1.60323
21.963	1.28322	1.02709	1.60323
21.963	1.28322	1.02709	1.60323
15.0637	1.82632	1.40681	2.37092
21.8809	1.28853	1.03234	1.60828
21.8809	1.28853	1.03234	1.60828
0.837782	1.14467	0.6875	1.90584
21.8809	1.28853	1.03234	1.60828
21.8809	1.28853	1.03234	1.60828
20.4134	1.38922	1.12628	1.71355
21.8809	1.28853	1.03234	1.60828
21.8809	1.28853	1.03234	1.60828
21.8809	1.28853	1.03234	1.60828
21.8809	1.28853	1.03234	1.60828
21.8809	1.28853	1.03234	1.60828
17.0486	1.65762	1.31602	2.08791
21.796	1.29404	1.03778	1.61358
16.3477	1.7166	1.34882	2.18466
21.796	1.29404	1.03778	1.61358
21.796	1.29404	1.03778	1.61358
21.796	1.29404	1.03778	1.61358
21.796	1.29404	1.03778	1.61358
21.796	1.29404	1.03778	1.61358
21.796	1.29404	1.03778	1.61358
21.796	1.29404	1.03778	1.61358
11.5291	2.03716	1.53296	2.7072
15.8741	1.75707	1.37055	2.25261
21.796	1.29404	1.03778	1.61358
39.2991	0.702723	0.5	1.2117
39.2991	0.702723	0.5	1.2117
39.2991	0.702723	0.5	1.2117
22.2861	1.26267	1.00647	1.58408
39.2991	0.702723	0.5	1.2117
39.2991	0.702723	0.5	1.2117
40.794	0.684122	0.5	1.19806
40.794	0.684122	0.5	1.19806
40.794	0.684122	0.5	1.19806
40.794	0.684122	0.5	1.19806
34.7488	0.77516	0.5	1.25991
2.41478	1.29412	0.881748	1.89936
9.16906	1.95252	1.52386	2.50177
39.6331	0.698463	0.5	1.20858
28.0027	0.968327	0.684417	1.37001
39.6331	0.698463	0.5	1.20858
16.7584	1.68187	1.3297	2.12732
16.7584	1.68187	1.3297	2.12732
39.5483	0.699539	0.5	1.20937
39.5483	0.699539	0.5	1.20937
39.5483	0.699539	0.5	1.20937
39.5483	0.699539	0.5	1.20937
39.5483	0.699539	0.5	1.20937
39.5483	0.699539	0.5	1.20937
21.7112	1.29958	1.04321	1.61896
21.7112	1.29958	1.04321	1.61896
21.7112	1.29958	1.04321	1.61896
18.0315	1.5776	1.26805	1.9627
21.7112	1.29958	1.04321	1.61896
15.2115	1.81377	1.40029	2.34933
21.7112	1.29958	1.04321	1.61896
21.7112	1.29958	1.04321	1.61896
0.0410678	1.57954	0.5	8.40586
20.8104	1.36075	1.10092	1.68189
21.7112	1.29958	1.04321	1.61896
21.7112	1.29958	1.04321	1.61896
21.6318	1.3048	1.0483	1.62407
10.8611	2.03365	1.54285	2.68057
21.6318	1.3048	1.0483	1.62407
21.6318	1.3048	1.0483	1.62407
21.6318	1.3048	1.0483	1.62407
21.6318	1.3048	1.0483	1.62407
21.6318	1.3048	1.0483	1.62407
21.6318	1.3048	1.0483	1.62407
21.6318	1.3048	1.0483	1.62407
21.0924	1.34112	1.08287	1.66096
21.6318	1.3048	1.0483	1.62407
21.6318	1.3048	1.0483	1.62407
21.6318	1.3048	1.0483	1.62407
21.6318	1.3048	1.0483	1.62407
21.6318	1.3048	1.0483	1.62407
21.6318	1.3048	1.0483	1.62407
21.6318	1.3048	1.0483	1.62407
21.6318	1.3048	1.0483	1.62407
21.5469	1.31042	1.05373	1.62962
21.5469	1.31042	1.05373	1.62962
21.5469	1.31042	1.05373	1.62962
21.5469	1.31042	1.05373	1.62962
21.5469	1.31042	1.05373	1.62962
21.5469	1.31042	1.05373	1.62962
21.5469	1.31042	1.05373	1.62962
21.5469	1.31042	1.05373	1.62962
21.5469	1.31042	1.05373	1.62962
21.5469	1.31042	1.05373	1.62962
21.5469	1.31042	1.05373	1.62962
21.5469	1.31042	1.05373	1.62962
21.4648	1.31588	1.059	1.63508
21.4648	1.31588	1.059	1.63508
19.0856	1.49266	1.20957	1.842
21.4648	1.31588	1.059	1.63508
21.4648	1.31588	1.059	1.63508
21.4648	1.31588	1.059	1.63508
21.4648	1.31588	1.059	1.63508
21.4648	1.31588	1.059	1.63508
16.293	1.72126	1.35135	2.19243
21.4648	1.31588	1.059	1.63508
21.4648	1.31588	1.059	1.63508
21.4648	1.31588	1.059	1.63508
39.2142	0.703816	0.5	1.21249
1.35524	1.18702	0.753392	1.87022
35.6687	0.757642	0.5	1.2491
28.7912	0.938476	0.651078	1.35274
28.2491	0.958747	0.673692	1.36442
39.2142	0.703816	0.5	1.21249
27.0472	1.00775	0.728716	1.39362
15.2553	1.81004	1.39835	2.34293
20.0739	1.41442	1.14786	1.74288
27.0472	1.00775	0.728716	1.39362
27.0472	1.00775	0.728716	1.39362
27.0472	1.00775	0.728716	1.39362
9.80151	1.9943	1.53954	2.58338
21.3799	1.32157	1.06444	1.64081
21.3799	1.32157	1.06444	1.64081
21.3799	1.32157	1.06444	1.64081
21.3799	1.32157	1.06444	1.64081
21.3799	1.32157	1.06444	1.64081
21.3799	1.32157	1.06444	1.64081
21.3799	1.32157	1.06444	1.64081
21.3799	1.32157	1.06444	1.64081
21.3799	1.32157	1.06444	1.64081
21.3799	1.32157	1.06444	1.64081
21.3799	1.32157	1.06444	1.64081
21.3799	1.32157	1.06444	1.64081
8.69268	1.91169	1.50368	2.4304
21.3799	1.32157	1.06444	1.64081
21.3799	1.32157	1.06444	1.64081
21.3799	1.32157	1.06444	1.64081
21.3799	1.32157	1.06444	1.64081
21.3799	1.32157	1.06444	1.64081
21.3799	1.32157	1.06444	1.64081
21.3799	1.32157	1.06444	1.64081
21.3799	1.32157	1.06444	1.64081
21.3799	1.32157	1.06444	1.64081
21.3799	1.32157	1.06444	1.64081
21.3799	1.32157	1.06444	1.64081
21.3799	1.32157	1.06444	1.64081
21.3799	1.32157	1.06444	1.64081
21.3799	1.32157	1.06444	1.64081
2.58179	1.31135	0.902069	1.90634
0.605065	1.13587	0.651646	1.9799
21.2977	1.32711	1.0697	1.64645
21.2977	1.32711	1.0697	1.64645
21.2977	1.32711	1.0697	1.64645
1.23203	1.1756	0.738303	1.8719
21.2977	1.32711	1.0697	1.64645
8.33949	1.87705	1.48387	2.37442
14.089	1.90617	1.44835	2.50872
8.61054	1.90382	1.49938	2.41735
21.2977	1.32711	1.0697	1.64645
21.2977	1.32711	1.0697	1.64645
21.2977	1.32711	1.0697	1.64645
21.2977	1.32711	1.0697	1.64645
21.2129	1.33287	1.07515	1.65238
21.2129	1.33287	1.07515	1.65238
18.5955	1.53222	1.23787	1.89656
13.8344	1.92564	1.45867	2.5421
21.2129	1.33287	1.07515	1.65238
21.2129	1.33287	1.07515	1.65238
21.128	1.33867	1.08059	1.6584
14.9049	1.83972	1.41376	2.39402
21.128	1.33867	1.08059	1.6584
21.128	1.33867	1.08059	1.6584
21.128	1.33867	1.08059	1.6584
21.128	1.33867	1.08059	1.6584
21.128	1.33867	1.08059	1.6584
21.128	1.33867	1.08059	1.6584
9.34155	1.96531	1.52931	2.5256
21.128	1.33867	1.08059	1.6584
21.128	1.33867	1.08059	1.6584
21.128	1.33867	1.08059	1.6584
1.35524	1.18702	0.753392	1.87022
1.35524	1.18702	0.753392	1.87022
35.6687	0.757642	0.5	1.2491
39.2142	0.703816	0.5	1.21249
31.7235	0.845913	0.550095	1.30081
39.2142	0.703816	0.5	1.21249
27.0472	1.00775	0.728716	1.39362
15.2553	1.81004	1.39835	2.34293
20.0739	1.41442	1.14786	1.74288
27.0472	1.00775	0.728716	1.39362
24.345	1.14111	0.877762	1.48348
27.0472	1.00775	0.728716	1.39362
18.883	1.50904	1.22152	1.86424
21.0459	1.34433	1.08585	1.66433
21.0459	1.34433	1.08585	1.66433
21.0459	1.34433	1.08585	1.66433
21.0459	1.34433	1.08585	1.66433
21.0459	1.34433	1.08585	1.66433
21.0459	1.34433	1.08585	1.66433
21.0459	1.34433	1.08585	1.66433
14.3765	1.88335	1.4364	2.46936
21.0459	1.34433	1.08585	1.66433
21.0459	1.34433	1.08585	1.66433
21.0459	1.34433	1.08585	1.66433
21.0459	1.34433	1.08585	1.66433
21.0459	1.34433	1.08585	1.66433
21.0459	1.34433	1.08585	1.66433
21.0459	1.34433	1.08585	1.66433
21.0459	1.34433	1.08585	1.66433
21.0459	1.34433	1.08585	1.66433
20.961	1.35021	1.09128	1.67056
20.961	1.35021	1.09128	1.67056
20.961	1.35021	1.09128	1.67056
20.961	1.35021	1.09128	1.67056
20.961	1.35021	1.09128	1.67056
20.961	1.35021	1.09128	1.67056
17.2923	1.63749	1.30441	2.05563
20.961	1.35021	1.09128	1.67056
20.961	1.35021	1.09128	1.67056
20.961	1.35021	1.09128	1.67056
13.4456	1.95361	1.47387	2.58951
20.961	1.35021	1.09128	1.67056
20.961	1.35021	1.09128	1.67056
20.961	1.35021	1.09128	1.67056
20.961	1.35021	1.09128	1.67056
20.961	1.35021	1.09128	1.67056
20.961	1.35021	1.09128	1.67056
20.961	1.35021	1.09128	1.67056
20.961	1.35021	1.09128	1.67056
20.961	1.35021	1.09128	1.67056
20.961	1.35021	1.09128	1.67056
20.961	1.35021	1.09128	1.67056
20.961	1.35021	1.09128	1.67056
20.1999	1.40497	1.13987	1.73174
10.6119	2.02776	1.54432	2.66253
20.8789	1.35594	1.09654	1.6767
20.8789	1.35594	1.09654	1.6767
20.8789	1.35594	1.09654	1.6767
20.8789	1.35594	1.09654	1.6767
20.8789	1.35594	1.09654	1.6767
20.8789	1.35594	1.09654	1.6767
[truncated: 2,723 more rows]

## Sheet: 2B
_t	hr	hr_lci	hr_uci
36.7091	0.799258	0.5	1.33042
36.7091	0.799258	0.5	1.33042
36.7091	0.799258	0.5	1.33042
4.24641	1.59756	1.12674	2.26512
36.7091	0.799258	0.5	1.33042
36.7091	0.799258	0.5	1.33042
3.70979	1.58027	1.08525	2.30109
3.70979	1.58027	1.08525	2.30109
3.70979	1.58027	1.08525	2.30109
1.83984	1.52254	0.944182	2.45516
3.70979	1.58027	1.08525	2.30109
3.70979	1.58027	1.08525	2.30109
36.7091	0.799258	0.5	1.33042
36.7091	0.799258	0.5	1.33042
36.7091	0.799258	0.5	1.33042
36.7091	0.799258	0.5	1.33042
36.7091	0.799258	0.5	1.33042
36.7091	0.799258	0.5	1.33042
36.6324	0.800449	0.5	1.3309
36.6324	0.800449	0.5	1.3309
36.6324	0.800449	0.5	1.3309
36.6324	0.800449	0.5	1.3309
36.6324	0.800449	0.5	1.3309
23.8193	1.12272	0.852711	1.47821
36.5476	0.801775	0.5	1.33144
1.25394	1.50981	0.904219	2.52099
36.5476	0.801775	0.5	1.33144
36.5476	0.801775	0.5	1.33144
3.75086	1.58159	1.08846	2.29814
36.3943	0.804186	0.5	1.3324
36.3806	0.804403	0.5	1.33249
25.4839	1.05346	0.774683	1.43255
29.3361	0.943503	0.644326	1.3816
36.3806	0.804403	0.5	1.33249
36.3806	0.804403	0.5	1.33249
36.3806	0.804403	0.5	1.33249
27.2361	0.99845	0.71024	1.40361
36.3806	0.804403	0.5	1.33249
36.3806	0.804403	0.5	1.33249
36.3806	0.804403	0.5	1.33249
23.4497	1.14079	0.872331	1.49186
36.3806	0.804403	0.5	1.33249
30.9925	0.905168	0.598782	1.36833
36.2984	0.805705	0.5	1.333
36.2984	0.805705	0.5	1.333
36.2984	0.805705	0.5	1.333
36.2984	0.805705	0.5	1.333
36.2984	0.805705	0.5	1.333
36.2984	0.805705	0.5	1.333
36.2984	0.805705	0.5	1.333
30.423	0.917897	0.613803	1.37265
28.4627	0.965422	0.670645	1.38977
33.3005	0.857938	0.544309	1.35228
33.3005	0.857938	0.544309	1.35228
36.2136	0.807057	0.5	1.33354
32.5832	0.871907	0.560186	1.35709
36.2136	0.807057	0.5	1.33354
36.2136	0.807057	0.5	1.33354
33.3443	0.857104	0.543368	1.35199
26.5845	1.01722	0.732471	1.41267
40.4654	0.746805	0.5	1.30754
40.4654	0.746805	0.5	1.30754
40.4654	0.746805	0.5	1.30754
2.08624	1.52936	0.961343	2.433
40.4654	0.746805	0.5	1.30754
40.4654	0.746805	0.5	1.30754
35.3812	0.820693	0.503087	1.33881
20.5832	1.3174	1.03788	1.67221
35.3812	0.820693	0.503087	1.33881
35.3812	0.820693	0.503087	1.33881
35.3812	0.820693	0.503087	1.33881
35.3812	0.820693	0.503087	1.33881
1.03217	1.50759	0.886902	2.56266
35.1211	0.825096	0.507871	1.34046
36.2136	0.807057	0.5	1.33354
36.2136	0.807057	0.5	1.33354
36.2136	0.807057	0.5	1.33354
14.9788	1.63425	1.23344	2.16531
36.1287	0.808416	0.5	1.33407
36.1287	0.808416	0.5	1.33407
36.1287	0.808416	0.5	1.33407
36.1287	0.808416	0.5	1.33407
25.1253	1.06681	0.790018	1.44057
20.2738	1.33899	1.05455	1.70016
36.1287	0.808416	0.5	1.33407
36.1287	0.808416	0.5	1.33407
36.1287	0.808416	0.5	1.33407
36.1287	0.808416	0.5	1.33407
33.807	0.848435	0.533633	1.34895
33.1307	0.861189	0.547984	1.35341
36.0465	0.809739	0.5	1.33459
36.0465	0.809739	0.5	1.33459
36.0465	0.809739	0.5	1.33459
36.0465	0.809739	0.5	1.33459
31.0883	0.90307	0.596319	1.36762
36.0465	0.809739	0.5	1.33459
36.0465	0.809739	0.5	1.33459
36.0465	0.809739	0.5	1.33459
36.0465	0.809739	0.5	1.33459
36.0465	0.809739	0.5	1.33459
28.2108	0.971981	0.67853	1.39234
25.5633	1.05061	0.771396	1.43088
36.0465	0.809739	0.5	1.33459
30.8145	0.909097	0.603406	1.36965
36.0465	0.809739	0.5	1.33459
36.0465	0.809739	0.5	1.33459
17.1718	1.53415	1.18177	1.99161
36.0465	0.809739	0.5	1.33459
36.0465	0.809739	0.5	1.33459
36.0465	0.809739	0.5	1.33459
25.0431	1.06998	0.793643	1.44253
36.0465	0.809739	0.5	1.33459
36.0465	0.809739	0.5	1.33459
36.0465	0.809739	0.5	1.33459
20.835	1.29979	1.02378	1.65022
35.9617	0.811112	0.5	1.33513
35.9617	0.811112	0.5	1.33513
35.9617	0.811112	0.5	1.33513
35.9617	0.811112	0.5	1.33513
35.9617	0.811112	0.5	1.33513
35.8795	0.812447	0.5	1.33565
35.8795	0.812447	0.5	1.33565
35.8795	0.812447	0.5	1.33565
35.8795	0.812447	0.5	1.33565
35.8795	0.812447	0.5	1.33565
0.747433	1.50953	0.854822	2.66568
35.8795	0.812447	0.5	1.33565
35.8795	0.812447	0.5	1.33565
35.8795	0.812447	0.5	1.33565
35.8795	0.812447	0.5	1.33565
25.1663	1.06524	0.788221	1.43961
35.8795	0.812447	0.5	1.33565
36.8569	0.796976	0.5	1.3295
34.7296	0.831856	0.515264	1.34297
40.3806	0.747889	0.5	1.30803
40.3806	0.747889	0.5	1.30803
40.3806	0.747889	0.5	1.30803
40.3806	0.747889	0.5	1.30803
37.0459	0.79409	0.5	1.32831
36.2081	0.807145	0.5	1.33357
34.4148	0.83741	0.52138	1.345
21.7522	1.23775	0.969859	1.57964
37.0459	0.79409	0.5	1.32831
23.885	1.11961	0.849305	1.47595
29.963	0.928517	0.62642	1.3763
35.0472	0.82636	0.509249	1.34094
35.0472	0.82636	0.509249	1.34094
0.481862	1.52223	0.792299	2.92464
35.0472	0.82636	0.509249	1.34094
32.0493	0.882709	0.572605	1.36075
7.16496	1.68473	1.28049	2.21658
27.6277	0.987604	0.69728	1.39881
35.7947	0.813834	0.5	1.33618
30.2012	0.922979	0.619832	1.37439
35.7947	0.813834	0.5	1.33618
25.2238	1.06306	0.785723	1.43828
35.7098	0.815228	0.5	1.33672
35.7098	0.815228	0.5	1.33672
22.9979	1.16432	0.897285	1.51082
35.7098	0.815228	0.5	1.33672
35.7098	0.815228	0.5	1.33672
35.7098	0.815228	0.5	1.33672
35.6331	0.816494	0.5	1.33721
35.6331	0.816494	0.5	1.33721
35.6331	0.816494	0.5	1.33721
35.6331	0.816494	0.5	1.33721
26.5079	1.01953	0.735186	1.41385
35.6331	0.816494	0.5	1.33721
35.5483	0.817901	0.500067	1.33775
35.5483	0.817901	0.500067	1.33775
35.5483	0.817901	0.500067	1.33775
35.5483	0.817901	0.500067	1.33775
35.5483	0.817901	0.500067	1.33775
35.5483	0.817901	0.500067	1.33775
35.4661	0.819271	0.501547	1.33827
35.4661	0.819271	0.501547	1.33827
35.4661	0.819271	0.501547	1.33827
35.4661	0.819271	0.501547	1.33827
21.5578	1.25036	0.981394	1.59304
35.4661	0.819271	0.501547	1.33827
35.4661	0.819271	0.501547	1.33827
31.2553	0.899444	0.592069	1.3664
35.4661	0.819271	0.501547	1.33827
18.13	1.48053	1.15064	1.90501
21.755	1.23757	0.969697	1.57945
10.5352	1.73198	1.29297	2.32005
35.3812	0.820693	0.503087	1.33881
35.3812	0.820693	0.503087	1.33881
35.3812	0.820693	0.503087	1.33881
35.3812	0.820693	0.503087	1.33881
35.3812	0.820693	0.503087	1.33881
35.3812	0.820693	0.503087	1.33881
40.2984	0.748942	0.5	1.3085
40.2984	0.748942	0.5	1.3085
40.2984	0.748942	0.5	1.3085
40.2984	0.748942	0.5	1.3085
40.2984	0.748942	0.5	1.3085
40.2984	0.748942	0.5	1.3085
34.2149	0.840991	0.525343	1.34629
24.7474	1.08177	0.80705	1.45
34.2149	0.840991	0.525343	1.34629
34.2149	0.840991	0.525343	1.34629
34.2149	0.840991	0.525343	1.34629
34.2149	0.840991	0.525343	1.34629
35.2991	0.822076	0.504587	1.33933
26.1766	1.02986	0.747295	1.41927
35.2991	0.822076	0.504587	1.33933
28.846	0.955647	0.658897	1.38605
35.2991	0.822076	0.504587	1.33933
35.2991	0.822076	0.504587	1.33933
20.5941	1.31664	1.03728	1.67124
35.2991	0.822076	0.504587	1.33933
35.2991	0.822076	0.504587	1.33933
35.2991	0.822076	0.504587	1.33933
35.2991	0.822076	0.504587	1.33933
35.2991	0.822076	0.504587	1.33933
34.8802	0.829237	0.512393	1.34201
34.8802	0.829237	0.512393	1.34201
34.8802	0.829237	0.512393	1.34201
34.8802	0.829237	0.512393	1.34201
34.8802	0.829237	0.512393	1.34201
34.8802	0.829237	0.512393	1.34201
34.8802	0.829237	0.512393	1.34201
34.8802	0.829237	0.512393	1.34201
34.8802	0.829237	0.512393	1.34201
4.10951	1.59316	1.1163	2.27373
34.8802	0.829237	0.512393	1.34201
30.9952	0.905108	0.598711	1.36831
34.7953	0.83071	0.514007	1.34255
34.7953	0.83071	0.514007	1.34255
14.4175	1.6556	1.24279	2.20553
3.50171	1.57355	1.06891	2.31645
34.7953	0.83071	0.514007	1.34255
34.7953	0.83071	0.514007	1.34255
23.3676	1.14495	0.876793	1.49511
34.7953	0.83071	0.514007	1.34255
30.8528	0.908247	0.602405	1.36937
34.7953	0.83071	0.514007	1.34255
34.7953	0.83071	0.514007	1.34255
34.7953	0.83071	0.514007	1.34255
34.7953	0.83071	0.514007	1.34255
34.0315	0.844315	0.529037	1.34748
34.7953	0.83071	0.514007	1.34255
33.6235	0.851843	0.537449	1.35015
34.7953	0.83071	0.514007	1.34255
34.7953	0.83071	0.514007	1.34255
34.7953	0.83071	0.514007	1.34255
34.0315	0.844315	0.529037	1.34748
34.7953	0.83071	0.514007	1.34255
34.7953	0.83071	0.514007	1.34255
33.6235	0.851843	0.537449	1.35015
34.7953	0.83071	0.514007	1.34255
22.5024	1.19201	0.925668	1.53498
21.3388	1.26494	0.994363	1.60914
30.4285	0.917772	0.613656	1.3726
40.2984	0.748942	0.5	1.3085
36.5092	0.802376	0.5	1.33168
17.4237	1.52068	1.17417	1.96945
36.794	0.797946	0.5	1.32989
36.794	0.797946	0.5	1.32989
36.794	0.797946	0.5	1.32989
36.794	0.797946	0.5	1.32989
26.0972	1.03243	0.75029	1.42066
30.8337	0.908672	0.602905	1.36951
22.0068	1.2217	0.954767	1.56327
33.963	0.845565	0.53043	1.34793
30.9843	0.905349	0.598994	1.36839
29.5003	0.939518	0.639555	1.38017
33.963	0.845565	0.53043	1.34793
33.963	0.845565	0.53043	1.34793
34.7105	0.832191	0.515632	1.34309
34.7105	0.832191	0.515632	1.34309
30.6639	0.912456	0.607368	1.37079
34.7105	0.832191	0.515632	1.34309
34.7105	0.832191	0.515632	1.34309
34.7105	0.832191	0.515632	1.34309
34.6338	0.833535	0.517109	1.34359
28.7584	0.95786	0.661555	1.38688
33.87	0.847274	0.532335	1.34853
34.6338	0.833535	0.517109	1.34359
34.6338	0.833535	0.517109	1.34359
34.6338	0.833535	0.517109	1.34359
20.5065	1.32276	1.04208	1.67905
34.6338	0.833535	0.517109	1.34359
34.6338	0.833535	0.517109	1.34359
22.9213	1.16847	0.901614	1.51431
34.6338	0.833535	0.517109	1.34359
34.6338	0.833535	0.517109	1.34359
34.6338	0.833535	0.517109	1.34359
27.2909	0.996915	0.708411	1.40291
22.5079	1.19169	0.92535	1.53469
34.6338	0.833535	0.517109	1.34359
34.6338	0.833535	0.517109	1.34359
34.6338	0.833535	0.517109	1.34359
34.5489	0.835031	0.518755	1.34413
34.5489	0.835031	0.518755	1.34413
34.5489	0.835031	0.518755	1.34413
34.5489	0.835031	0.518755	1.34413
22.8364	1.17312	0.906435	1.51828
34.5489	0.835031	0.518755	1.34413
34.4668	0.836485	0.520359	1.34466
34.4668	0.836485	0.520359	1.34466
22.089	1.21664	0.949911	1.55827
34.4668	0.836485	0.520359	1.34466
34.4668	0.836485	0.520359	1.34466
24.5175	1.09135	0.817863	1.45628
34.3819	0.837996	0.522027	1.34521
34.3819	0.837996	0.522027	1.34521
34.3819	0.837996	0.522027	1.34521
34.3819	0.837996	0.522027	1.34521
34.3819	0.837996	0.522027	1.34521
34.3819	0.837996	0.522027	1.34521
34.2998	0.839465	0.523653	1.34574
21.922	1.22699	0.959792	1.56858
34.2998	0.839465	0.523653	1.34574
34.2998	0.839465	0.523653	1.34574
31.9288	0.885196	0.575481	1.36159
34.2998	0.839465	0.523653	1.34574
22.9624	1.16624	0.899292	1.51243
34.2149	0.840991	0.525343	1.34629
34.2149	0.840991	0.525343	1.34629
33.3361	0.85726	0.543544	1.35204
34.2149	0.840991	0.525343	1.34629
34.2149	0.840991	0.525343	1.34629
29.0732	0.949968	0.652078	1.38394
33.2129	0.859611	0.546199	1.35286
33.2129	0.859611	0.546199	1.35286
32.0411	0.882878	0.5728	1.36081
15.6934	1.6048	1.21927	2.11222
9.66735	1.72352	1.29716	2.29001
11.2142	1.73382	1.28733	2.33517
25.8973	1.03904	0.757992	1.4243
34.13	0.842524	0.527046	1.34684
34.13	0.842524	0.527046	1.34684
34.13	0.842524	0.527046	1.34684
22.5927	1.18681	0.920428	1.53028
34.13	0.842524	0.527046	1.34684
16.2136	1.58152	1.20737	2.07161
34.13	0.842524	0.527046	1.34684
34.13	0.842524	0.527046	1.34684
34.13	0.842524	0.527046	1.34684
34.13	0.842524	0.527046	1.34684
29.7522	0.933489	0.632349	1.37804
34.13	0.842524	0.527046	1.34684
34.13	0.842524	0.527046	1.34684
34.13	0.842524	0.527046	1.34684
27.0938	1.00247	0.715023	1.40547
1.8371	1.52247	0.943995	2.45542
34.13	0.842524	0.527046	1.34684
34.13	0.842524	0.527046	1.34684
34.13	0.842524	0.527046	1.34684
21.2977	1.26772	0.996789	1.61228
34.13	0.842524	0.527046	1.34684
34.13	0.842524	0.527046	1.34684
29.8234	0.931802	0.630336	1.37745
33.963	0.845565	0.53043	1.34793
32.7912	0.867792	0.555487	1.35568
33.963	0.845565	0.53043	1.34793
33.963	0.845565	0.53043	1.34793
30.9843	0.905349	0.598994	1.36839
33.963	0.845565	0.53043	1.34793
33.963	0.845565	0.53043	1.34793
32.8296	0.867039	0.554629	1.35542
33.963	0.845565	0.53043	1.34793
33.963	0.845565	0.53043	1.34793
33.963	0.845565	0.53043	1.34793
33.8809	0.847072	0.53211	1.34846
33.8809	0.847072	0.53211	1.34846
12.4189	1.71671	1.27251	2.31598
24.1697	1.10653	0.834844	1.46663
33.8809	0.847072	0.53211	1.34846
33.8809	0.847072	0.53211	1.34846
24.345	1.09877	0.826192	1.46128
40.2984	0.748942	0.5	1.3085
40.2984	0.748942	0.5	1.3085
35.666	0.815951	0.5	1.337
36.7748	0.798241	0.5	1.33001
40.2984	0.748942	0.5	1.3085
33.0459	0.862827	0.549841	1.35397
33.0459	0.862827	0.549841	1.35397
33.0459	0.862827	0.549841	1.35397
33.0459	0.862827	0.549841	1.35397
33.0459	0.862827	0.549841	1.35397
33.0459	0.862827	0.549841	1.35397
33.8809	0.847072	0.53211	1.34846
33.8809	0.847072	0.53211	1.34846
33.8809	0.847072	0.53211	1.34846
33.8809	0.847072	0.53211	1.34846
33.8809	0.847072	0.53211	1.34846
29.8234	0.931802	0.630336	1.37745
18.204	1.47612	1.14797	1.89808
33.796	0.848637	0.533859	1.34902
33.796	0.848637	0.533859	1.34902
33.796	0.848637	0.533859	1.34902
32.1013	0.881641	0.571372	1.36039
33.796	0.848637	0.533859	1.34902
33.7112	0.85021	0.535619	1.34957
33.7112	0.85021	0.535619	1.34957
33.7112	0.85021	0.535619	1.34957
33.7112	0.85021	0.535619	1.34957
33.7112	0.85021	0.535619	1.34957
33.7112	0.85021	0.535619	1.34957
33.6318	0.851689	0.537277	1.35009
21.0294	1.28619	1.01256	1.63377
33.6318	0.851689	0.537277	1.35009
29.6728	0.935379	0.634606	1.3787
33.6318	0.851689	0.537277	1.35009
4.83504	1.61639	1.16982	2.23343
33.5469	0.853278	0.539061	1.35065
33.5469	0.853278	0.539061	1.35065
33.5469	0.853278	0.539061	1.35065
33.5469	0.853278	0.539061	1.35065
33.5469	0.853278	0.539061	1.35065
4.75017	1.61369	1.16384	2.23742
33.128	0.861241	0.548044	1.35343
27.8357	0.981959	0.690512	1.39642
33.128	0.861241	0.548044	1.35343
33.128	0.861241	0.548044	1.35343
29.3963	0.942037	0.64257	1.38107
33.128	0.861241	0.548044	1.35343
33.128	0.861241	0.548044	1.35343
33.128	0.861241	0.548044	1.35343
27.2635	0.997682	0.709325	1.40326
33.128	0.861241	0.548044	1.35343
33.128	0.861241	0.548044	1.35343
33.128	0.861241	0.548044	1.35343
33.128	0.861241	0.548044	1.35343
28.2382	0.971263	0.677667	1.39206
33.128	0.861241	0.548044	1.35343
33.128	0.861241	0.548044	1.35343
33.128	0.861241	0.548044	1.35343
33.128	0.861241	0.548044	1.35343
33.0459	0.862827	0.549841	1.35397
33.0459	0.862827	0.549841	1.35397
33.0459	0.862827	0.549841	1.35397
27.5838	0.988803	0.698716	1.39933
33.0459	0.862827	0.549841	1.35397
33.0459	0.862827	0.549841	1.35397
22.4175	1.19695	0.930612	1.53951
9.74949	1.72438	1.29689	2.29279
7.83573	1.69834	1.29172	2.23296
40.2136	0.750033	0.5	1.30899
29.4127	0.941638	0.642092	1.38093
40.2136	0.750033	0.5	1.30899
32.0465	0.882765	0.57267	1.36077
32.0465	0.882765	0.57267	1.36077
32.0465	0.882765	0.57267	1.36077
32.0465	0.882765	0.57267	1.36077
32.0465	0.882765	0.57267	1.36077
32.0465	0.882765	0.57267	1.36077
33.0459	0.862827	0.549841	1.35397
33.0459	0.862827	0.549841	1.35397
33.0459	0.862827	0.549841	1.35397
33.0459	0.862827	0.549841	1.35397
33.0459	0.862827	0.549841	1.35397
33.0459	0.862827	0.549841	1.35397
32.961	0.864473	0.55171	1.35454
32.961	0.864473	0.55171	1.35454
32.961	0.864473	0.55171	1.35454
32.961	0.864473	0.55171	1.35454
32.961	0.864473	0.55171	1.35454
32.961	0.864473	0.55171	1.35454
32.8789	0.866075	0.553531	1.35509
32.8789	0.866075	0.553531	1.35509
32.8789	0.866075	0.553531	1.35509
32.8789	0.866075	0.553531	1.35509
29.3333	0.94357	0.644406	1.38162
32.8789	0.866075	0.553531	1.35509
32.7091	0.86941	0.557332	1.35624
32.7091	0.86941	0.557332	1.35624
32.7091	0.86941	0.557332	1.35624
32.7091	0.86941	0.557332	1.35624
32.7091	0.86941	0.557332	1.35624
32.7091	0.86941	0.557332	1.35624
32.7091	0.86941	0.557332	1.35624
30.3326	0.919959	0.616247	1.37335
32.7091	0.86941	0.557332	1.35624
1.99589	1.5268	0.954985	2.441
30.7488	0.910559	0.605129	1.37015
32.7091	0.86941	0.557332	1.35624
32.6324	0.870928	0.559066	1.35675
32.6324	0.870928	0.559066	1.35675
32.6324	0.870928	0.559066	1.35675
32.6324	0.870928	0.559066	1.35675
32.6324	0.870928	0.559066	1.35675
32.6324	0.870928	0.559066	1.35675
32.5476	0.872616	0.560998	1.35733
32.5476	0.872616	0.560998	1.35733
32.5476	0.872616	0.560998	1.35733
32.5476	0.872616	0.560998	1.35733
32.5476	0.872616	0.560998	1.35733
32.5476	0.872616	0.560998	1.35733
24.1615	1.1069	0.835254	1.46688
32.4654	0.874259	0.56288	1.35789
32.4654	0.874259	0.56288	1.35789
32.4654	0.874259	0.56288	1.35789
32.4654	0.874259	0.56288	1.35789
32.4654	0.874259	0.56288	1.35789
40.2136	0.750033	0.5	1.30899
40.2136	0.750033	0.5	1.30899
40.2136	0.750033	0.5	1.30899
40.2136	0.750033	0.5	1.30899
40.2136	0.750033	0.5	1.30899
40.2136	0.750033	0.5	1.30899
30.8802	0.907641	0.601691	1.36916
30.8802	0.907641	0.601691	1.36916
30.8802	0.907641	0.601691	1.36916
30.8802	0.907641	0.601691	1.36916
22.8775	1.17087	0.904098	1.51634
30.8802	0.907641	0.601691	1.36916
32.4654	0.874259	0.56288	1.35789
26.3135	1.02552	0.742216	1.41696
32.4654	0.874259	0.56288	1.35789
11.0883	1.73423	1.28858	2.334
32.4654	0.874259	0.56288	1.35789
22.0014	1.22204	0.955091	1.56361
30.089	0.925578	0.622922	1.37528
32.4654	0.874259	0.56288	1.35789
32.4654	0.874259	0.56288	1.35789
32.4654	0.874259	0.56288	1.35789
32.4654	0.874259	0.56288	1.35789
32.4654	0.874259	0.56288	1.35789
22.6886	1.18137	0.9149	1.52545
32.3806	0.875965	0.564837	1.35847
32.3806	0.875965	0.564837	1.35847
32.3806	0.875965	0.564837	1.35847
20.668	1.31147	1.03318	1.66472
3.00342	1.55755	1.02987	2.35559
32.3806	0.875965	0.564837	1.35847
32.3806	0.875965	0.564837	1.35847
32.3806	0.875965	0.564837	1.35847
32.3806	0.875965	0.564837	1.35847
32.3806	0.875965	0.564837	1.35847
32.3806	0.875965	0.564837	1.35847
0.668036	1.51173	0.841332	2.71632
22.7652	1.17707	0.9105	1.52169
32.2984	0.877624	0.566744	1.35903
32.2984	0.877624	0.566744	1.35903
32.2984	0.877624	0.566744	1.35903
32.2984	0.877624	0.566744	1.35903
32.2136	0.879348	0.568728	1.35962
32.2136	0.879348	0.568728	1.35962
32.2136	0.879348	0.568728	1.35962
32.2136	0.879348	0.568728	1.35962
20.5832	1.3174	1.03788	1.67221
32.2136	0.879348	0.568728	1.35962
32.1287	0.88108	0.570725	1.3602
32.1287	0.88108	0.570725	1.3602
0.150582	1.60115	0.526315	4.871
10.7515	1.73367	1.2915	2.32724
32.1287	0.88108	0.570725	1.3602
32.1287	0.88108	0.570725	1.3602
32.1287	0.88108	0.570725	1.3602
24.2491	1.10299	0.830899	1.46417
32.1287	0.88108	0.570725	1.3602
32.1287	0.88108	0.570725	1.3602
32.1287	0.88108	0.570725	1.3602
32.1287	0.88108	0.570725	1.3602
31.9617	0.884516	0.574694	1.36137
31.9617	0.884516	0.574694	1.36137
31.9617	0.884516	0.574694	1.36137
31.9617	0.884516	0.574694	1.36137
31.9617	0.884516	0.574694	1.36137
31.9617	0.884516	0.574694	1.36137
40.1287	0.751129	0.5	1.30949
40.1287	0.751129	0.5	1.30949
40.1287	0.751129	0.5	1.30949
40.1287	0.751129	0.5	1.30949
27.0034	1.00504	0.718078	1.40668
40.1287	0.751129	0.5	1.30949
23.8275	1.12233	0.852284	1.47793
30.13	0.924625	0.621788	1.37496
30.13	0.924625	0.621788	1.37496
30.13	0.924625	0.621788	1.37496
30.13	0.924625	0.621788	1.37496
30.13	0.924625	0.621788	1.37496
31.9617	0.884516	0.574694	1.36137
8.91718	1.7148	1.29805	2.26534
31.9617	0.884516	0.574694	1.36137
26.4038	1.02271	0.738922	1.41549
31.9617	0.884516	0.574694	1.36137
31.9617	0.884516	0.574694	1.36137
31.8795	0.886218	0.576665	1.36194
31.8795	0.886218	0.576665	1.36194
31.8795	0.886218	0.576665	1.36194
31.8795	0.886218	0.576665	1.36194
31.8795	0.886218	0.576665	1.36194
31.8795	0.886218	0.576665	1.36194
31.8795	0.886218	0.576665	1.36194
1.75222	1.52026	0.938207	2.46341
18.8556	1.4355	1.1224	1.83594
31.8795	0.886218	0.576665	1.36194
31.8795	0.886218	0.576665	1.36194
31.8795	0.886218	0.576665	1.36194
25.5825	1.04993	0.770609	1.43049
31.7947	0.887987	0.578715	1.36254
31.7947	0.887987	0.578715	1.36254
31.7947	0.887987	0.578715	1.36254
31.7947	0.887987	0.578715	1.36254
31.7947	0.887987	0.578715	1.36254
11.2498	1.73365	1.28696	2.33538
31.7947	0.887987	0.578715	1.36254
31.7947	0.887987	0.578715	1.36254
31.7947	0.887987	0.578715	1.36254
16.7775	1.55437	1.19291	2.02536
31.7947	0.887987	0.578715	1.36254
31.7947	0.887987	0.578715	1.36254
29.462	0.940444	0.640663	1.3805
0.172485	1.58908	0.559969	4.50952
0.172485	1.58908	0.559969	4.50952
31.7947	0.887987	0.578715	1.36254
31.7947	0.887987	0.578715	1.36254
31.6331	0.891378	0.582655	1.36368
20.501	1.32314	1.04238	1.67954
31.6331	0.891378	0.582655	1.36368
31.6331	0.891378	0.582655	1.36368
30.809	0.909219	0.603549	1.3697
31.6331	0.891378	0.582655	1.36368
9.58248	1.72261	1.29741	2.28715
40.0465	0.752193	0.5	1.30996
30.1766	0.923548	0.620508	1.37458
40.0465	0.752193	0.5	1.30996
36.2574	0.806358	0.5	1.33326
40.0465	0.752193	0.5	1.30996
0.607803	1.51416	0.828719	2.76652
21.4867	1.25505	0.985614	1.59815
27.7947	0.983066	0.691841	1.39688
27.7947	0.983066	0.691841	1.39688
26.5572	1.01804	0.733437	1.41309
27.7947	0.983066	0.691841	1.39688
40.794	0.742644	0.5	1.30567
40.794	0.742644	0.5	1.30567
1.59343	1.51639	0.927488	2.47921
27.6687	0.986484	0.695938	1.39833
21.922	1.22699	0.959792	1.56858
38.1903	0.777293	0.5	1.32119
31.3812	0.896735	0.5889	1.36548
16.6434	1.56101	1.1965	2.03657
31.3812	0.896735	0.5889	1.36548
31.3812	0.896735	0.5889	1.36548
31.3812	0.896735	0.5889	1.36548
31.3812	0.896735	0.5889	1.36548
27.4059	0.993711	0.704586	1.40148
31.2142	0.900332	0.593109	1.3667
31.2142	0.900332	0.593109	1.3667
24.2546	1.10274	0.830629	1.464
31.2142	0.900332	0.593109	1.3667
28.0465	0.97632	0.683743	1.39409
31.1294	0.902175	0.595268	1.36732
31.1294	0.902175	0.595268	1.36732
31.1294	0.902175	0.595268	1.36732
30.6064	0.913747	0.608893	1.37123
31.1294	0.902175	0.595268	1.36732
31.1294	0.902175	0.595268	1.36732
31.0472	0.903968	0.597372	1.36792
31.0472	0.903968	0.597372	1.36792
31.0472	0.903968	0.597372	1.36792
31.0472	0.903968	0.597372	1.36792
25.6838	1.04636	0.766484	1.42843
31.0472	0.903968	0.597372	1.36792
31.0472	0.903968	0.597372	1.36792
0.0985626	1.64272	0.5	6.33275
31.0472	0.903968	0.597372	1.36792
21.9877	1.22289	0.955901	1.56446
31.0472	0.903968	0.597372	1.36792
31.0472	0.903968	0.597372	1.36792
31.0472	0.903968	0.597372	1.36792
31.0472	0.903968	0.597372	1.36792
31.0472	0.903968	0.597372	1.36792
31.0472	0.903968	0.597372	1.36792
31.0472	0.903968	0.597372	1.36792
31.0472	0.903968	0.597372	1.36792
24.4627	1.09368	0.820486	1.45784
29.9904	0.927876	0.625656	1.37608
30.9624	0.90583	0.59956	1.36855
30.9624	0.90583	0.59956	1.36855
30.9624	0.90583	0.59956	1.36855
30.9624	0.90583	0.59956	1.36855
23.102	1.15875	0.891451	1.50621
30.9624	0.90583	0.59956	1.36855
30.9624	0.90583	0.59956	1.36855
25.744	1.04427	0.764061	1.42724
30.9624	0.90583	0.59956	1.36855
1.75222	1.52026	0.938207	2.46341
30.5489	0.915043	0.610425	1.37167
30.5489	0.915043	0.610425	1.37167
30.5489	0.915043	0.610425	1.37167
30.5489	0.915043	0.610425	1.37167
23.0034	1.16402	0.896977	1.51057
30.5489	0.915043	0.610425	1.37167
40.0465	0.752193	0.5	1.30996
9.37166	1.72028	1.29789	2.28013
40.0465	0.752193	0.5	1.30996
29.8344	0.931544	0.630028	1.37736
40.0465	0.752193	0.5	1.30996
38.141	0.777992	0.5	1.32149
34.6338	0.833535	0.517109	1.34359
34.6338	0.833535	0.517109	1.34359
34.6338	0.833535	0.517109	1.34359
21.1444	1.2782	1.00582	1.62435
14.9596	1.63501	1.23379	2.1667
34.6338	0.833535	0.517109	1.34359
24.6324	1.08651	0.812414	1.45309
22.8556	1.17207	0.905344	1.51737
24.6324	1.08651	0.812414	1.45309
24.6324	1.08651	0.812414	1.45309
24.6324	1.08651	0.812414	1.45309
15.269	1.62262	1.22799	2.14407
30.2998	0.920711	0.61714	1.37361
30.2998	0.920711	0.61714	1.37361
5.42642	1.63508	1.20858	2.21208
30.2998	0.920711	0.61714	1.37361
30.2998	0.920711	0.61714	1.37361
30.2998	0.920711	0.61714	1.37361
30.2149	0.922663	0.619457	1.37428
30.2149	0.922663	0.619457	1.37428
30.2149	0.922663	0.619457	1.37428
30.2149	0.922663	0.619457	1.37428
30.2149	0.922663	0.619457	1.37428
30.2149	0.922663	0.619457	1.37428
30.13	0.924625	0.621788	1.37496
30.13	0.924625	0.621788	1.37496
21.9658	1.22426	0.957197	1.56582
30.13	0.924625	0.621788	1.37496
30.13	0.924625	0.621788	1.37496
30.13	0.924625	0.621788	1.37496
30.13	0.924625	0.621788	1.37496
30.13	0.924625	0.621788	1.37496
30.13	0.924625	0.621788	1.37496
30.13	0.924625	0.621788	1.37496
3.39767	1.5702	1.06073	2.32438
30.13	0.924625	0.621788	1.37496
30.0479	0.926534	0.624059	1.37562
30.0479	0.926534	0.624059	1.37562
30.0479	0.926534	0.624059	1.37562
30.0479	0.926534	0.624059	1.37562
18.1218	1.48102	1.15094	1.90577
30.0479	0.926534	0.624059	1.37562
16.8296	1.55176	1.19149	2.02097
29.963	0.928517	0.62642	1.3763
29.963	0.928517	0.62642	1.3763
29.963	0.928517	0.62642	1.3763
29.963	0.928517	0.62642	1.3763
29.963	0.928517	0.62642	1.3763
29.796	0.93245	0.631109	1.37767
22.2834	1.20488	0.938465	1.54693
28.2519	0.970904	0.677236	1.39192
29.796	0.93245	0.631109	1.37767
23.9206	1.11794	0.847471	1.47474
29.796	0.93245	0.631109	1.37767
29.7112	0.934465	0.633515	1.37838
29.7112	0.934465	0.633515	1.37838
1.36345	1.51161	0.911912	2.50568
29.7112	0.934465	0.633515	1.37838
29.7112	0.934465	0.633515	1.37838
29.7112	0.934465	0.633515	1.37838
28.5448	0.963306	0.668102	1.38895
40.0465	0.752193	0.5	1.30996
40.0465	0.752193	0.5	1.30996
40.0465	0.752193	0.5	1.30996
34.5024	0.835854	0.519663	1.34443
40.0465	0.752193	0.5	1.30996
23.6331	1.13169	0.862498	1.48489
23.6331	1.13169	0.862498	1.48489
23.6331	1.13169	0.862498	1.48489
23.6331	1.13169	0.862498	1.48489
23.6331	1.13169	0.862498	1.48489
23.6331	1.13169	0.862498	1.48489
29.7112	0.934465	0.633515	1.37838
27.332	0.995768	0.707042	1.4024
29.7112	0.934465	0.633515	1.37838
29.7112	0.934465	0.633515	1.37838
19.6386	1.38292	1.08661	1.76003
29.7112	0.934465	0.633515	1.37838
16.6352	1.56141	1.19672	2.03726
29.6318	0.93636	0.635779	1.37905
29.6318	0.93636	0.635779	1.37905
21.5907	1.24821	0.979445	1.59072
29.6318	0.93636	0.635779	1.37905
29.6318	0.93636	0.635779	1.37905
24.5585	1.08961	0.815907	1.45513
28.3778	0.96762	0.673287	1.39062
29.6318	0.93636	0.635779	1.37905
29.6318	0.93636	0.635779	1.37905
27.2526	0.997989	0.709691	1.4034
15.5236	1.61205	1.22287	2.12509
29.6318	0.93636	0.635779	1.37905
29.6318	0.93636	0.635779	1.37905
29.6318	0.93636	0.635779	1.37905
17.525	1.51514	1.17101	1.96041
29.6318	0.93636	0.635779	1.37905
29.6318	0.93636	0.635779	1.37905
13.4209	1.68963	1.25806	2.26925
13.4209	1.68963	1.25806	2.26925
29.6318	0.93636	0.635779	1.37905
29.6318	0.93636	0.635779	1.37905
0.353183	1.53742	0.73166	3.23054
29.6318	0.93636	0.635779	1.37905
29.6318	0.93636	0.635779	1.37905
27.2526	0.997989	0.709691	1.4034
29.6318	0.93636	0.635779	1.37905
29.6318	0.93636	0.635779	1.37905
29.6318	0.93636	0.635779	1.37905
29.6318	0.93636	0.635779	1.37905
29.6318	0.93636	0.635779	1.37905
29.6318	0.93636	0.635779	1.37905
29.6318	0.93636	0.635779	1.37905
29.6318	0.93636	0.635779	1.37905
29.6318	0.93636	0.635779	1.37905
29.6318	0.93636	0.635779	1.37905
29.5469	0.938396	0.638213	1.37977
29.5469	0.938396	0.638213	1.37977
29.5469	0.938396	0.638213	1.37977
29.5469	0.938396	0.638213	1.37977
29.5469	0.938396	0.638213	1.37977
29.5469	0.938396	0.638213	1.37977
29.5469	0.938396	0.638213	1.37977
29.5469	0.938396	0.638213	1.37977
19.3867	1.40011	1.09859	1.78437
29.5469	0.938396	0.638213	1.37977
27.2498	0.998066	0.709782	1.40344
29.5469	0.938396	0.638213	1.37977
29.5469	0.938396	0.638213	1.37977
29.5469	0.938396	0.638213	1.37977
1.00205	1.50748	0.884228	2.57005
29.5469	0.938396	0.638213	1.37977
29.5469	0.938396	0.638213	1.37977
29.5469	0.938396	0.638213	1.37977
31.1403	0.901937	0.594989	1.36724
19.2717	1.40789	1.10393	1.79554
38.6694	0.770599	0.5	1.31822
39.8795	0.754368	0.5	1.31094
39.8795	0.754368	0.5	1.31094
39.8795	0.754368	0.5	1.31094
29.2977	0.944439	0.645448	1.38193
29.2977	0.944439	0.645448	1.38193
0.5859	1.51523	0.823484	2.78807
0.703628	1.51062	0.847759	2.69177
29.2977	0.944439	0.645448	1.38193
29.0048	0.95167	0.654121	1.38457
29.2977	0.944439	0.645448	1.38193
2.83368	1.55215	1.01675	2.36949
23.5866	1.13397	0.864976	1.48662
1.00479	1.50749	0.884476	2.56935
29.2977	0.944439	0.645448	1.38193
29.2977	0.944439	0.645448	1.38193
0.991102	1.50746	0.883228	2.57288
14.3792	1.657	1.24339	2.20821
29.2129	0.94652	0.647942	1.38269
29.2129	0.94652	0.647942	1.38269
29.2129	0.94652	0.647942	1.38269
29.2129	0.94652	0.647942	1.38269
20.4736	1.32505	1.04386	1.68199
29.128	0.948612	0.650451	1.38345
21.3361	1.26512	0.994525	1.60935
29.128	0.948612	0.650451	1.38345
29.128	0.948612	0.650451	1.38345
29.128	0.948612	0.650451	1.38345
29.128	0.948612	0.650451	1.38345
20.8706	1.2973	1.02175	1.64717
29.128	0.948612	0.650451	1.38345
23.1485	1.15629	0.888858	1.5042
16.9363	1.54635	1.18853	2.0119
29.128	0.948612	0.650451	1.38345
29.0459	0.950648	0.652894	1.38419
29.0459	0.950648	0.652894	1.38419
29.0459	0.950648	0.652894	1.38419
29.0459	0.950648	0.652894	1.38419
16.1533	1.5843	1.20882	2.07641
29.0459	0.950648	0.652894	1.38419
1.1718	1.50873	0.898171	2.53434
29.0459	0.950648	0.652894	1.38419
29.0459	0.950648	0.652894	1.38419
29.0459	0.950648	0.652894	1.38419
29.0459	0.950648	0.652894	1.38419
29.0459	0.950648	0.652894	1.38419
28.961	0.952763	0.655433	1.38497
28.961	0.952763	0.655433	1.38497
28.961	0.952763	0.655433	1.38497
28.961	0.952763	0.655433	1.38497
28.7091	0.95911	0.663058	1.38735
28.961	0.952763	0.655433	1.38497
39.7947	0.755479	0.5	1.31144
0.668036	1.51173	0.841332	2.71632
39.7947	0.755479	0.5	1.31144
39.7947	0.755479	0.5	1.31144
39.7947	0.755479	0.5	1.31144
39.7947	0.755479	0.5	1.31144
28.961	0.952763	0.655433	1.38497
22.6448	1.18385	0.917423	1.52764
28.961	0.952763	0.655433	1.38497
28.961	0.952763	0.655433	1.38497
28.961	0.952763	0.655433	1.38497
28.961	0.952763	0.655433	1.38497
28.961	0.952763	0.655433	1.38497
24.8789	1.07646	0.801023	1.4466
28.961	0.952763	0.655433	1.38497
0.435318	1.52666	0.773897	3.01165
28.961	0.952763	0.655433	1.38497
28.961	0.952763	0.655433	1.38497
28.8789	0.954821	0.657905	1.38574
28.8789	0.954821	0.657905	1.38574
28.8789	0.954821	0.657905	1.38574
28.8789	0.954821	0.657905	1.38574
28.8789	0.954821	0.657905	1.38574
28.8789	0.954821	0.657905	1.38574
28.8789	0.954821	0.657905	1.38574
28.8789	0.954821	0.657905	1.38574
28.8789	0.954821	0.657905	1.38574
19.6359	1.38311	1.08674	1.7603
18.7789	1.44045	1.12561	1.84334
28.8789	0.954821	0.657905	1.38574
22.4997	1.19216	0.925827	1.53512
28.794	0.956959	0.660474	1.38654
28.794	0.956959	0.660474	1.38654
28.794	0.956959	0.660474	1.38654
22.4942	1.19248	0.926145	1.53541
28.794	0.956959	0.660474	1.38654
39.7947	0.755479	0.5	1.31144
27.7563	0.984103	0.693085	1.39732
39.7947	0.755479	0.5	1.31144
39.7947	0.755479	0.5	1.31144
0.618754	1.51366	0.831197	2.75646
39.7947	0.755479	0.5	1.31144
28.6324	0.961062	0.665405	1.38809
28.6324	0.961062	0.665405	1.38809
28.6324	0.961062	0.665405	1.38809
20.9391	1.29251	1.01781	1.64135
28.6324	0.961062	0.665405	1.38809
28.6324	0.961062	0.665405	1.38809
28.5476	0.963236	0.668017	1.38892
28.5476	0.963236	0.668017	1.38892
28.5476	0.963236	0.668017	1.38892
28.5476	0.963236	0.668017	1.38892
19.5975	1.38574	1.08859	1.76399
17.3607	1.52409	1.17611	1.97503
28.4654	0.965351	0.67056	1.38974
19.258	1.40881	1.10456	1.79687
24.2546	1.10274	0.830629	1.464
28.4654	0.965351	0.67056	1.38974
15.3402	1.6197	1.22659	2.1388
25.4209	1.05574	0.777317	1.43389
28.4654	0.965351	0.67056	1.38974
28.4654	0.965351	0.67056	1.38974
28.4654	0.965351	0.67056	1.38974
28.4654	0.965351	0.67056	1.38974
28.4654	0.965351	0.67056	1.38974
28.4654	0.965351	0.67056	1.38974
28.4654	0.965351	0.67056	1.38974
28.4654	0.965351	0.67056	1.38974
28.4654	0.965351	0.67056	1.38974
28.4654	0.965351	0.67056	1.38974
8.59138	1.71041	1.29729	2.25509
8.59138	1.71041	1.29729	2.25509
19.6112	1.3848	1.08793	1.76267
28.3806	0.967548	0.673202	1.39059
28.3806	0.967548	0.673202	1.39059
28.3806	0.967548	0.673202	1.39059
28.3806	0.967548	0.673202	1.39059
28.3806	0.967548	0.673202	1.39059
28.2984	0.969687	0.675773	1.39143
28.2984	0.969687	0.675773	1.39143
28.2984	0.969687	0.675773	1.39143
28.2984	0.969687	0.675773	1.39143
0.279261	1.55195	0.678517	3.54974
28.2984	0.969687	0.675773	1.39143
39.7098	0.756594	0.5	1.31194
29.6591	0.935706	0.634996	1.37882
38.1903	0.777293	0.5	1.32119
13.2457	1.69498	1.26067	2.27891
39.7098	0.756594	0.5	1.31194
25.0459	1.06987	0.793522	1.44247
28.2136	0.97191	0.678444	1.39232
28.2136	0.97191	0.678444	1.39232
28.2136	0.97191	0.678444	1.39232
28.2136	0.97191	0.678444	1.39232
28.2136	0.97191	0.678444	1.39232
28.2136	0.97191	0.678444	1.39232
23.9206	1.11794	0.847471	1.47474
27.0253	1.00441	0.717336	1.40638
28.2136	0.97191	0.678444	1.39232
28.2136	0.97191	0.678444	1.39232
28.2136	0.97191	0.678444	1.39232
28.2136	0.97191	0.678444	1.39232
28.2136	0.97191	0.678444	1.39232
28.2136	0.97191	0.678444	1.39232
28.2136	0.97191	0.678444	1.39232
28.2136	0.97191	0.678444	1.39232
28.2136	0.97191	0.678444	1.39232
2.17112	1.53182	0.967389	2.42559
28.1287	0.974145	0.68113	1.39321
28.1287	0.974145	0.68113	1.39321
28.1287	0.974145	0.68113	1.39321
28.1287	0.974145	0.68113	1.39321
21.3771	1.26236	0.992097	1.60624
0.0848734	1.65866	0.5	6.99301
20.6626	1.31185	1.03349	1.6652
27.8795	0.98078	0.689098	1.39593
27.8795	0.98078	0.689098	1.39593
27.8795	0.98078	0.689098	1.39593
27.8795	0.98078	0.689098	1.39593
27.8795	0.98078	0.689098	1.39593
20.3285	1.33518	1.05165	1.69515
27.6331	0.987455	0.697101	1.39874
27.6331	0.987455	0.697101	1.39874
27.6331	0.987455	0.697101	1.39874
27.6331	0.987455	0.697101	1.39874
2.34086	1.53687	0.979687	2.41095
39.6331	0.757605	0.5	1.31239
39.6331	0.757605	0.5	1.31239
30.5216	0.915661	0.611156	1.37188
39.6331	0.757605	0.5	1.31239
39.6331	0.757605	0.5	1.31239
39.6331	0.757605	0.5	1.31239
27.6331	0.987455	0.697101	1.39874
27.6331	0.987455	0.697101	1.39874
27.6331	0.987455	0.697101	1.39874
0.0821355	1.66224	0.5	7.14952
27.6331	0.987455	0.697101	1.39874
27.6331	0.987455	0.697101	1.39874
27.5483	0.98978	0.699885	1.39975
27.5483	0.98978	0.699885	1.39975
20.6954	1.30956	1.03166	1.66232
27.5483	0.98978	0.699885	1.39975
27.5483	0.98978	0.699885	1.39975
27.5483	0.98978	0.699885	1.39975
19.4223	1.39769	1.09692	1.78092
21.5222	1.2527	0.983504	1.59558
27.4661	0.992043	0.702592	1.40074
27.4661	0.992043	0.702592	1.40074
27.4661	0.992043	0.702592	1.40074
27.4661	0.992043	0.702592	1.40074
27.3812	0.994396	0.705403	1.40178
27.3812	0.994396	0.705403	1.40178
27.3812	0.994396	0.705403	1.40178
27.3812	0.994396	0.705403	1.40178
27.3812	0.994396	0.705403	1.40178
27.3812	0.994396	0.705403	1.40178
27.2991	0.996685	0.708137	1.40281
27.2991	0.996685	0.708137	1.40281
17.6044	1.51075	1.16848	1.95327
27.2991	0.996685	0.708137	1.40281
27.2991	0.996685	0.708137	1.40281
27.2991	0.996685	0.708137	1.40281
27.2142	0.999065	0.710974	1.40389
21.2704	1.26957	0.998404	1.61439
27.2142	0.999065	0.710974	1.40389
19.0034	1.42584	1.11604	1.82163
27.2142	0.999065	0.710974	1.40389
27.2142	0.999065	0.710974	1.40389
27.2142	0.999065	0.710974	1.40389
17.514	1.51574	1.17135	1.96139
23.54	1.13627	0.867465	1.48838
27.2142	0.999065	0.710974	1.40389
27.2142	0.999065	0.710974	1.40389
27.2142	0.999065	0.710974	1.40389
27.2142	0.999065	0.710974	1.40389
22.5626	1.18853	0.922172	1.53183
16.0876	1.5873	1.21037	2.08161
27.2142	0.999065	0.710974	1.40389
26.6694	1.0147	0.729502	1.4114
27.2142	0.999065	0.710974	1.40389
29.2101	0.946587	0.648022	1.38271
39.6331	0.757605	0.5	1.31239
29.4209	0.941439	0.641854	1.38085
32.1424	0.8808	0.570402	1.36011
39.6331	0.757605	0.5	1.31239
39.6331	0.757605	0.5	1.31239
20.5777	1.31779	1.03818	1.6727
28.5941	0.962042	0.666583	1.38846
31.7098	0.889764	0.580779	1.36314
22.3573	1.20049	0.934132	1.5428
31.7098	0.889764	0.580779	1.36314
31.7098	0.889764	0.580779	1.36314
26.6338	1.01575	0.730743	1.41192
26.6338	1.01575	0.730743	1.41192
26.6338	1.01575	0.730743	1.41192
26.6338	1.01575	0.730743	1.41192
26.6338	1.01575	0.730743	1.41192
26.6338	1.01575	0.730743	1.41192
25.922	1.03821	0.757029	1.42384
26.6338	1.01575	0.730743	1.41192
26.6338	1.01575	0.730743	1.41192
20.9254	1.29347	1.0186	1.64251
26.6338	1.01575	0.730743	1.41192
26.6338	1.01575	0.730743	1.41192
26.5489	1.01829	0.733727	1.41321
26.5489	1.01829	0.733727	1.41321
26.5489	1.01829	0.733727	1.41321
26.5489	1.01829	0.733727	1.41321
26.5489	1.01829	0.733727	1.41321
26.5489	1.01829	0.733727	1.41321
26.5489	1.01829	0.733727	1.41321
26.5489	1.01829	0.733727	1.41321
26.5489	1.01829	0.733727	1.41321
26.5489	1.01829	0.733727	1.41321
26.5489	1.01829	0.733727	1.41321
26.5489	1.01829	0.733727	1.41321
26.3819	1.02339	0.739717	1.41584
26.3819	1.02339	0.739717	1.41584
26.3819	1.02339	0.739717	1.41584
26.3819	1.02339	0.739717	1.41584
26.3819	1.02339	0.739717	1.41584
13.9192	1.67332	1.25052	2.23906
26.2998	1.02595	0.742719	1.41719
26.2998	1.02595	0.742719	1.41719
17.3908	1.52246	1.17519	1.97236
26.2998	1.02595	0.742719	1.41719
26.2998	1.02595	0.742719	1.41719
26.2998	1.02595	0.742719	1.41719
26.2998	1.02595	0.742719	1.41719
0.17796	1.5864	0.56776	4.43264
20.1314	1.3489	1.06198	1.71333
26.2998	1.02595	0.742719	1.41719
26.2998	1.02595	0.742719	1.41719
26.2998	1.02595	0.742719	1.41719
39.6331	0.757605	0.5	1.31239
39.6331	0.757605	0.5	1.31239
39.6331	0.757605	0.5	1.31239
39.6331	0.757605	0.5	1.31239
39.6331	0.757605	0.5	1.31239
39.6331	0.757605	0.5	1.31239
31.5483	0.893174	0.584746	1.36428
31.5483	0.893174	0.584746	1.36428
31.5483	0.893174	0.584746	1.36428
31.5483	0.893174	0.584746	1.36428
31.5483	0.893174	0.584746	1.36428
31.5483	0.893174	0.584746	1.36428
0.0930869	1.64874	0.5	6.57511
20.0465	1.35479	1.06634	1.72126
26.2149	1.02864	0.745862	1.41862
0.0930869	1.64874	0.5	6.57511
26.2149	1.02864	0.745862	1.41862
26.2149	1.02864	0.745862	1.41862
26.2149	1.02864	0.745862	1.41862
26.2149	1.02864	0.745862	1.41862
24.6708	1.08492	0.810617	1.45205
26.2149	1.02864	0.745862	1.41862
26.2149	1.02864	0.745862	1.41862
26.2149	1.02864	0.745862	1.41862
26.13	1.03136	0.749046	1.42008
26.13	1.03136	0.749046	1.42008
26.13	1.03136	0.749046	1.42008
26.13	1.03136	0.749046	1.42008
26.13	1.03136	0.749046	1.42008
26.13	1.03136	0.749046	1.42008
26.0479	1.03404	0.752167	1.42154
17.64	1.50876	1.16733	1.95006
26.0479	1.03404	0.752167	1.42154
26.0479	1.03404	0.752167	1.42154
15.551	1.61089	1.2223	2.12303
26.0479	1.03404	0.752167	1.42154
11.8741	1.72706	1.27971	2.33079
23.6687	1.12995	0.860612	1.48359
26.0479	1.03404	0.752167	1.42154
26.0479	1.03404	0.752167	1.42154
26.0479	1.03404	0.752167	1.42154
26.0479	1.03404	0.752167	1.42154
25.3361	1.05886	0.780907	1.43575
25.963	1.03684	0.755434	1.42308
25.963	1.03684	0.755434	1.42308
5.10883	1.62507	1.18845	2.2221
25.963	1.03684	0.755434	1.42308
25.963	1.03684	0.755434	1.42308
25.963	1.03684	0.755434	1.42308
25.963	1.03684	0.755434	1.42308
12.2519	1.72027	1.27478	2.32145
21.7632	1.23705	0.969209	1.5789
11.5838	1.73092	1.28325	2.33476
25.963	1.03684	0.755434	1.42308
19.7947	1.3722	1.07899	1.74509
14.6585	1.64661	1.23896	2.18839
25.963	1.03684	0.755434	1.42308
25.963	1.03684	0.755434	1.42308
25.963	1.03684	0.755434	1.42308
25.963	1.03684	0.755434	1.42308
20.3833	1.33136	1.04873	1.69016
25.963	1.03684	0.755434	1.42308
25.963	1.03684	0.755434	1.42308
19.154	1.41582	1.10932	1.80699
0.613279	1.5139	0.829969	2.76143
25.963	1.03684	0.755434	1.42308
25.963	1.03684	0.755434	1.42308
25.963	1.03684	0.755434	1.42308
25.963	1.03684	0.755434	1.42308
25.963	1.03684	0.755434	1.42308
25.963	1.03684	0.755434	1.42308
25.963	1.03684	0.755434	1.42308
40.794	0.742644	0.5	1.30567
40.794	0.742644	0.5	1.30567
23.9042	1.11871	0.848316	1.47529
40.794	0.742644	0.5	1.30567
39.9206	0.753831	0.5	1.3107
40.794	0.742644	0.5	1.30567
12.668	1.71084	1.26903	2.30646
40.794	0.742644	0.5	1.30567
17.6674	1.50723	1.16644	1.94759
40.794	0.742644	0.5	1.30567
40.794	0.742644	0.5	1.30567
21.4976	1.25433	0.984965	1.59736
25.8809	1.03959	0.758635	1.4246
21.5031	1.25397	0.98464	1.59696
25.8809	1.03959	0.758635	1.4246
25.8809	1.03959	0.758635	1.4246
21.5031	1.25397	0.98464	1.59696
0.429843	1.52725	0.771502	3.02333
17.3361	1.52542	1.17686	1.97721
20.7967	1.30247	1.02596	1.65351
25.8809	1.03959	0.758635	1.4246
21.5031	1.25397	0.98464	1.59696
25.8809	1.03959	0.758635	1.4246
25.8809	1.03959	0.758635	1.4246
25.7112	1.04541	0.76538	1.42789
25.7112	1.04541	0.76538	1.42789
25.7112	1.04541	0.76538	1.42789
25.7112	1.04541	0.76538	1.42789
15.1704	1.62662	1.22989	2.15133
25.7112	1.04541	0.76538	1.42789
25.6318	1.04818	0.768594	1.42948
25.6318	1.04818	0.768594	1.42948
25.6318	1.04818	0.768594	1.42948
18.2587	1.47283	1.14596	1.89294
25.6318	1.04818	0.768594	1.42948
25.6318	1.04818	0.768594	1.42948
25.4648	1.05415	0.775482	1.43295
25.4648	1.05415	0.775482	1.43295
25.4648	1.05415	0.775482	1.43295
25.4648	1.05415	0.775482	1.43295
9.42094	1.72083	1.2978	2.28177
20.616	1.31511	1.03607	1.6693
25.4648	1.05415	0.775482	1.43295
25.4648	1.05415	0.775482	1.43295
10.6667	1.73312	1.29211	2.32465
25.4648	1.05415	0.775482	1.43295
21.0869	1.28218	1.00919	1.62902
14.9295	1.63619	1.23433	2.16888
15.258	1.62307	1.22821	2.14488
25.3799	1.05725	0.779048	1.43479
20.6927	1.30975	1.03181	1.66256
25.3799	1.05725	0.779048	1.43479
25.3799	1.05725	0.779048	1.43479
25.3799	1.05725	0.779048	1.43479
29.2101	0.946587	0.648022	1.38271
34.6092	0.833969	0.517586	1.34375
1.77413	1.52082	0.939696	2.46132
39.6331	0.757605	0.5	1.31239
39.6331	0.757605	0.5	1.31239
39.6331	0.757605	0.5	1.31239
25.3799	1.05725	0.779048	1.43479
25.3799	1.05725	0.779048	1.43479
25.3799	1.05725	0.779048	1.43479
25.3799	1.05725	0.779048	1.43479
4.91718	1.619	1.17552	2.22979
25.358	1.05805	0.779976	1.43527
24.7502	1.08166	0.806924	1.44993
25.2129	1.06347	0.786197	1.43853
25.2129	1.06347	0.786197	1.43853
25.2129	1.06347	0.786197	1.43853
25.2129	1.06347	0.786197	1.43853
25.2129	1.06347	0.786197	1.43853
25.128	1.0667	0.789897	1.44051
25.128	1.0667	0.789897	1.44051
19.1376	1.41692	1.11007	1.80859
25.128	1.0667	0.789897	1.44051
25.128	1.0667	0.789897	1.44051
20.679	1.31071	1.03257	1.66375
25.128	1.0667	0.789897	1.44051
18.2779	1.47167	1.14525	1.89113
25.128	1.0667	0.789897	1.44051
25.128	1.0667	0.789897	1.44051
25.128	1.0667	0.789897	1.44051
25.128	1.0667	0.789897	1.44051
25.0459	1.06987	0.793522	1.44247
25.0459	1.06987	0.793522	1.44247
25.0459	1.06987	0.793522	1.44247
25.0459	1.06987	0.793522	1.44247
13.0376	1.70102	1.26372	2.28963
25.0459	1.06987	0.793522	1.44247
24.4983	1.09216	0.818779	1.45682
24.961	1.0732	0.797312	1.44454
24.961	1.0732	0.797312	1.44454
24.961	1.0732	0.797312	1.44454
7.08556	1.6829	1.27866	2.21495
24.961	1.0732	0.797312	1.44454
13.0842	1.6997	1.26304	2.28731
39.5483	0.758728	0.5	1.3129
39.5483	0.758728	0.5	1.3129
39.5483	0.758728	0.5	1.3129
39.5483	0.758728	0.5	1.3129
33.2293	0.859297	0.545844	1.35275
18.1273	1.4807	1.15074	1.90526
28.794	0.956959	0.660474	1.38654
28.794	0.956959	0.660474	1.38654
22.0999	1.21597	0.949265	1.55761
28.794	0.956959	0.660474	1.38654
28.794	0.956959	0.660474	1.38654
24.8789	1.07646	0.801023	1.4466
24.8789	1.07646	0.801023	1.4466
24.8789	1.07646	0.801023	1.4466
17.6756	1.50677	1.16618	1.94684
24.4162	1.09568	0.822732	1.45918
24.8789	1.07646	0.801023	1.4466
24.8789	1.07646	0.801023	1.4466
24.8789	1.07646	0.801023	1.4466
24.8789	1.07646	0.801023	1.4466
24.8789	1.07646	0.801023	1.4466
24.8789	1.07646	0.801023	1.4466
24.8789	1.07646	0.801023	1.4466
24.8789	1.07646	0.801023	1.4466
24.8789	1.07646	0.801023	1.4466
13.3689	1.69124	1.25884	2.27217
24.8789	1.07646	0.801023	1.4466
24.8789	1.07646	0.801023	1.4466
24.8789	1.07646	0.801023	1.4466
21.2457	1.27125	0.999857	1.61631
18.026	1.48667	1.15433	1.91469
24.7091	1.08334	0.808829	1.45102
24.7091	1.08334	0.808829	1.45102
24.7091	1.08334	0.808829	1.45102
24.7091	1.08334	0.808829	1.45102
24.7091	1.08334	0.808829	1.45102
24.7091	1.08334	0.808829	1.45102
24.7091	1.08334	0.808829	1.45102
24.7091	1.08334	0.808829	1.45102
24.7091	1.08334	0.808829	1.45102
24.7091	1.08334	0.808829	1.45102
24.7091	1.08334	0.808829	1.45102
24.7091	1.08334	0.808829	1.45102
14.2642	1.66118	1.24519	2.21615
24.7091	1.08334	0.808829	1.45102
24.7091	1.08334	0.808829	1.45102
24.7091	1.08334	0.808829	1.45102
24.7091	1.08334	0.808829	1.45102
24.7091	1.08334	0.808829	1.45102
24.7091	1.08334	0.808829	1.45102
24.7091	1.08334	0.808829	1.45102
19.7673	1.37408	1.08034	1.7477
24.7091	1.08334	0.808829	1.45102
24.6324	1.08651	0.812414	1.45309
24.6324	1.08651	0.812414	1.45309
24.6324	1.08651	0.812414	1.45309
24.6324	1.08651	0.812414	1.45309
24.6324	1.08651	0.812414	1.45309
24.6324	1.08651	0.812414	1.45309
2.32991	1.53654	0.978885	2.41189
28.794	0.956959	0.660474	1.38654
20.7502	1.30573	1.02858	1.65754
28.794	0.956959	0.660474	1.38654
28.794	0.956959	0.660474	1.38654
0.501027	1.52067	0.798968	2.89428
24.5476	1.09007	0.816428	1.45543
24.5476	1.09007	0.816428	1.45543
24.5476	1.09007	0.816428	1.45543
24.5476	1.09007	0.816428	1.45543
24.5476	1.09007	0.816428	1.45543
24.5476	1.09007	0.816428	1.45543
24.3806	1.09722	0.824458	1.46022
24.3806	1.09722	0.824458	1.46022
24.3806	1.09722	0.824458	1.46022
24.3806	1.09722	0.824458	1.46022
17.5113	1.51589	1.17144	1.96163
2.59822	1.54476	0.998818	2.38912
24.3806	1.09722	0.824458	1.46022
24.3806	1.09722	0.824458	1.46022
0.40794	1.52978	0.761376	3.07366
24.3806	1.09722	0.824458	1.46022
17.5113	1.51589	1.17144	1.96163
2.59822	1.54476	0.998818	2.38912
24.2984	1.10081	0.828471	1.46267
24.2984	1.10081	0.828471	1.46267
24.2984	1.10081	0.828471	1.46267
6.92129	1.67897	1.27447	2.21184
24.2984	1.10081	0.828471	1.46267
24.2984	1.10081	0.828471	1.46267
24.2136	1.10457	0.832663	1.46526
24.2136	1.10457	0.832663	1.46526
24.2136	1.10457	0.832663	1.46526
17.6044	1.51075	1.16848	1.95327
24.2136	1.10457	0.832663	1.46526
24.2136	1.10457	0.832663	1.46526
24.2136	1.10457	0.832663	1.46526
24.2136	1.10457	0.832663	1.46526
24.2136	1.10457	0.832663	1.46526
24.2136	1.10457	0.832663	1.46526
24.2136	1.10457	0.832663	1.46526
24.2136	1.10457	0.832663	1.46526
24.1287	1.10838	0.836899	1.46792
24.1287	1.10838	0.836899	1.46792
24.1287	1.10838	0.836899	1.46792
19.4305	1.39713	1.09654	1.78012
16.4928	1.56833	1.20042	2.049
24.1287	1.10838	0.836899	1.46792
0.50924	1.52004	0.801683	2.8821
24.1287	1.10838	0.836899	1.46792
18.037	1.48603	1.15395	1.91368
24.1287	1.10838	0.836899	1.46792
14.7652	1.64254	1.23718	2.18072
24.1287	1.10838	0.836899	1.46792
24.1287	1.10838	0.836899	1.46792
24.1287	1.10838	0.836899	1.46792
24.1287	1.10838	0.836899	1.46792
24.1287	1.10838	0.836899	1.46792
24.1287	1.10838	0.836899	1.46792
24.1287	1.10838	0.836899	1.46792
12.2355	1.7206	1.275	2.32195
24.1287	1.10838	0.836899	1.46792
12.501	1.71485	1.27137	2.31301
24.1287	1.10838	0.836899	1.46792
14.7652	1.64254	1.23718	2.18072
24.1287	1.10838	0.836899	1.46792
28.7091	0.95911	0.663058	1.38735
28.7091	0.95911	0.663058	1.38735
28.7091	0.95911	0.663058	1.38735
28.7091	0.95911	0.663058	1.38735
28.7091	0.95911	0.663058	1.38735
28.7091	0.95911	0.663058	1.38735
24.0465	1.11212	0.841041	1.47056
24.0465	1.11212	0.841041	1.47056
24.0465	1.11212	0.841041	1.47056
24.0465	1.11212	0.841041	1.47056
24.0465	1.11212	0.841041	1.47056
24.0465	1.11212	0.841041	1.47056
24.0465	1.11212	0.841041	1.47056
24.0465	1.11212	0.841041	1.47056
24.0465	1.11212	0.841041	1.47056
24.0465	1.11212	0.841041	1.47056
24.0465	1.11212	0.841041	1.47056
8.66804	1.71148	1.29755	2.25747
23.9617	1.11603	0.845363	1.47336
17.2731	1.52879	1.17876	1.98275
0.342231	1.53922	0.724842	3.26858
23.9617	1.11603	0.845363	1.47336
23.9617	1.11603	0.845363	1.47336
23.9617	1.11603	0.845363	1.47336
23.9617	1.11603	0.845363	1.47336
23.9617	1.11603	0.845363	1.47336
23.9617	1.11603	0.845363	1.47336
6.6694	1.67252	1.26697	2.20787
23.9617	1.11603	0.845363	1.47336
23.9617	1.11603	0.845363	1.47336
23.9617	1.11603	0.845363	1.47336
23.9617	1.11603	0.845363	1.47336
23.9617	1.11603	0.845363	1.47336
23.9617	1.11603	0.845363	1.47336
23.9617	1.11603	0.845363	1.47336
23.9617	1.11603	0.845363	1.47336
23.8795	1.11987	0.849588	1.47613
23.8795	1.11987	0.849588	1.47613
23.8795	1.11987	0.849588	1.47613
23.8795	1.11987	0.849588	1.47613
23.8795	1.11987	0.849588	1.47613
23.8795	1.11987	0.849588	1.47613
23.8795	1.11987	0.849588	1.47613
23.8795	1.11987	0.849588	1.47613
23.8795	1.11987	0.849588	1.47613
23.8795	1.11987	0.849588	1.47613
23.8795	1.11987	0.849588	1.47613
23.8795	1.11987	0.849588	1.47613
23.7947	1.12389	0.853995	1.47908
23.7947	1.12389	0.853995	1.47908
23.7947	1.12389	0.853995	1.47908
23.7947	1.12389	0.853995	1.47908
23.7947	1.12389	0.853995	1.47908
23.7947	1.12389	0.853995	1.47908
39.4661	0.759818	0.5	1.31339
39.4661	0.759818	0.5	1.31339
27.3402	0.995539	0.706768	1.40229
26.7543	1.01222	0.726573	1.41016
39.4661	0.759818	0.5	1.31339
39.4661	0.759818	0.5	1.31339
24.5503	1.08996	0.816297	1.45536
28.6324	0.961062	0.665405	1.38809
28.6324	0.961062	0.665405	1.38809
28.6324	0.961062	0.665405	1.38809
28.6324	0.961062	0.665405	1.38809
20.2546	1.34033	1.05555	1.70193
23.7947	1.12389	0.853995	1.47908
23.7947	1.12389	0.853995	1.47908
23.7947	1.12389	0.853995	1.47908
23.7947	1.12389	0.853995	1.47908
23.7947	1.12389	0.853995	1.47908
23.7947	1.12389	0.853995	1.47908
23.6331	1.13169	0.862498	1.48489
23.6331	1.13169	0.862498	1.48489
23.6331	1.13169	0.862498	1.48489
23.6331	1.13169	0.862498	1.48489
23.6331	1.13169	0.862498	1.48489
23.6331	1.13169	0.862498	1.48489
23.4661	1.13996	0.871443	1.49122
23.4661	1.13996	0.871443	1.49122
23.4661	1.13996	0.871443	1.49122
8.42163	1.70795	1.29655	2.24989
23.4661	1.13996	0.871443	1.49122
23.4661	1.13996	0.871443	1.49122
23.2991	1.14845	0.880538	1.49788
23.2991	1.14845	0.880538	1.49788
23.2991	1.14845	0.880538	1.49788
23.2991	1.14845	0.880538	1.49788
16.2437	1.58012	1.20664	2.0692
23.2991	1.14845	0.880538	1.49788
23.2991	1.14845	0.880538	1.49788
1.84257	1.52261	0.94437	2.45491
23.2991	1.14845	0.880538	1.49788
23.2991	1.14845	0.880538	1.49788
23.2991	1.14845	0.880538	1.49788
23.2991	1.14845	0.880538	1.49788
23.2142	1.15285	0.885214	1.50141
14.5544	1.65052	1.24063	2.19583
23.2142	1.15285	0.885214	1.50141
15.9918	1.59164	1.21261	2.08915
23.2142	1.15285	0.885214	1.50141
23.2142	1.15285	0.885214	1.50141
23.1294	1.15731	0.889925	1.50502
23.1294	1.15731	0.889925	1.50502
21.8371	1.23234	0.964824	1.57403
23.1294	1.15731	0.889925	1.50502
23.1294	1.15731	0.889925	1.50502
23.1294	1.15731	0.889925	1.50502
23.1294	1.15731	0.889925	1.50502
23.1294	1.15731	0.889925	1.50502
0.123203	1.62013	0.5	5.49464
23.1294	1.15731	0.889925	1.50502
23.1294	1.15731	0.889925	1.50502
23.1294	1.15731	0.889925	1.50502
39.4661	0.759818	0.5	1.31339
39.4661	0.759818	0.5	1.31339
36.6379	0.800364	0.5	1.33087
39.4661	0.759818	0.5	1.31339
34.5654	0.834741	0.518436	1.34403
39.4661	0.759818	0.5	1.31339
12.3368	1.7185	1.27363	2.31877
28.5476	0.963236	0.668017	1.38892
28.5476	0.963236	0.668017	1.38892
15.9179	1.59495	1.2143	2.09492
0.325804	1.54213	0.713984	3.33083
28.5476	0.963236	0.668017	1.38892
23.0472	1.16167	0.894516	1.50862
23.0472	1.16167	0.894516	1.50862
23.0472	1.16167	0.894516	1.50862
23.0472	1.16167	0.894516	1.50862
13.4921	1.6874	1.257	2.26517
23.0472	1.16167	0.894516	1.50862
23.0472	1.16167	0.894516	1.50862
23.0472	1.16167	0.894516	1.50862
17.0979	1.53802	1.18392	1.99802
23.0472	1.16167	0.894516	1.50862
23.0472	1.16167	0.894516	1.50862
23.0472	1.16167	0.894516	1.50862
21.755	1.23757	0.969697	1.57945
23.0472	1.16167	0.894516	1.50862
23.0472	1.16167	0.894516	1.50862
23.0472	1.16167	0.894516	1.50862
23.0472	1.16167	0.894516	1.50862
23.0472	1.16167	0.894516	1.50862
21.6701	1.24304	0.974734	1.5852
22.9624	1.16624	0.899292	1.51243
22.9624	1.16624	0.899292	1.51243
22.9624	1.16624	0.899292	1.51243
22.9624	1.16624	0.899292	1.51243
22.9624	1.16624	0.899292	1.51243
22.9624	1.16624	0.899292	1.51243
22.9624	1.16624	0.899292	1.51243
22.9624	1.16624	0.899292	1.51243
10.1875	1.72875	1.29497	2.30783
22.9624	1.16624	0.899292	1.51243
22.9624	1.16624	0.899292	1.51243
22.8802	1.17072	0.903943	1.51622
22.8802	1.17072	0.903943	1.51622
22.8802	1.17072	0.903943	1.51622
22.8802	1.17072	0.903943	1.51622
22.8802	1.17072	0.903943	1.51622
21.7139	1.24021	0.972134	1.58221
22.8802	1.17072	0.903943	1.51622
22.8802	1.17072	0.903943	1.51622
22.8802	1.17072	0.903943	1.51622
21.588	1.24839	0.979607	1.59091
22.8802	1.17072	0.903943	1.51622
22.8802	1.17072	0.903943	1.51622
22.8802	1.17072	0.903943	1.51622
22.8802	1.17072	0.903943	1.51622
22.8802	1.17072	0.903943	1.51622
22.8802	1.17072	0.903943	1.51622
22.8802	1.17072	0.903943	1.51622
22.8802	1.17072	0.903943	1.51622
22.7953	1.1754	0.908778	1.52024
22.7953	1.1754	0.908778	1.52024
22.7953	1.1754	0.908778	1.52024
22.7953	1.1754	0.908778	1.52024
22.7953	1.1754	0.908778	1.52024
20.835	1.29979	1.02378	1.65022
22.7953	1.1754	0.908778	1.52024
19.165	1.41508	1.10882	1.80593
20.063	1.35365	1.0655	1.71972
11.4141	1.73255	1.28519	2.33563
22.7953	1.1754	0.908778	1.52024
22.7953	1.1754	0.908778	1.52024
39.4661	0.759818	0.5	1.31339
39.4661	0.759818	0.5	1.31339
38.4586	0.77352	0.5	1.31953
39.4661	0.759818	0.5	1.31339
39.4661	0.759818	0.5	1.31339
29.0869	0.949628	0.651671	1.38382
23.9644	1.1159	0.845223	1.47327
28.0465	0.97632	0.683743	1.39409
28.0465	0.97632	0.683743	1.39409
28.0465	0.97632	0.683743	1.39409
0.925394	1.50749	0.876857	2.59167
19.6687	1.38086	1.08515	1.75714
22.7105	1.18014	0.913641	1.52437
15.5127	1.61251	1.2231	2.12591
22.7105	1.18014	0.913641	1.52437
22.7105	1.18014	0.913641	1.52437
22.7105	1.18014	0.913641	1.52437
22.7105	1.18014	0.913641	1.52437
22.6338	1.18447	0.918055	1.52819
10.319	1.72999	1.29426	2.31242
22.6338	1.18447	0.918055	1.52819
10.319	1.72999	1.29426	2.31242
22.6338	1.18447	0.918055	1.52819
14.0945	1.66723	1.24782	2.22761
18.9185	1.4314	1.11972	1.82985
22.5489	1.18932	0.922965	1.53254
22.5489	1.18932	0.922965	1.53254
22.5489	1.18932	0.922965	1.53254
22.5489	1.18932	0.922965	1.53254
22.5489	1.18932	0.922965	1.53254
22.5489	1.18932	0.922965	1.53254
22.5489	1.18932	0.922965	1.53254
22.5489	1.18932	0.922965	1.53254
22.5489	1.18932	0.922965	1.53254
22.5489	1.18932	0.922965	1.53254
22.5489	1.18932	0.922965	1.53254
22.4668	1.19407	0.927739	1.53686
1.44559	1.51318	0.917522	2.49554
22.4668	1.19407	0.927739	1.53686
22.4668	1.19407	0.927739	1.53686
22.4668	1.19407	0.927739	1.53686
22.4668	1.19407	0.927739	1.53686
22.4668	1.19407	0.927739	1.53686
18.8364	1.43674	1.12321	1.8378
22.4668	1.19407	0.927739	1.53686
19.7344	1.37634	1.08195	1.75084
22.4668	1.19407	0.927739	1.53686
22.4668	1.19407	0.927739	1.53686
22.4668	1.19407	0.927739	1.53686
22.4668	1.19407	0.927739	1.53686
22.4668	1.19407	0.927739	1.53686
22.4668	1.19407	0.927739	1.53686
22.4668	1.19407	0.927739	1.53686
22.4668	1.19407	0.927739	1.53686
0.919918	1.50751	0.876294	2.5934
22.3819	1.19904	0.932691	1.54145
22.3819	1.19904	0.932691	1.54145
22.3819	1.19904	0.932691	1.54145
16.6489	1.56074	1.19635	2.03612
22.3819	1.19904	0.932691	1.54145
22.3819	1.19904	0.932691	1.54145
19.0034	1.42584	1.11604	1.82163
22.3819	1.19904	0.932691	1.54145
22.3819	1.19904	0.932691	1.54145
17.2348	1.53082	1.17991	1.98611
22.3819	1.19904	0.932691	1.54145
31.9754	0.884233	0.574366	1.36127
39.4661	0.759818	0.5	1.31339
39.4661	0.759818	0.5	1.31339
39.4661	0.759818	0.5	1.31339
39.4661	0.759818	0.5	1.31339
39.4661	0.759818	0.5	1.31339
27.8795	0.98078	0.689098	1.39593
23.7974	1.12376	0.853852	1.47898
27.8795	0.98078	0.689098	1.39593
19.5017	1.39228	1.09317	1.77323
27.8795	0.98078	0.689098	1.39593
27.8795	0.98078	0.689098	1.39593
22.3819	1.19904	0.932691	1.54145
17.2183	1.53169	1.18039	1.98755
18.026	1.48667	1.15433	1.91469
22.3819	1.19904	0.932691	1.54145
22.3819	1.19904	0.932691	1.54145
18.3381	1.46802	1.14301	1.88545
22.3819	1.19904	0.932691	1.54145
22.3819	1.19904	0.932691	1.54145
10.7515	1.73367	1.2915	2.32724
22.3819	1.19904	0.932691	1.54145
22.3819	1.19904	0.932691	1.54145
3.91786	1.58698	1.10149	2.28646
22.3819	1.19904	0.932691	1.54145
19.0034	1.42584	1.11604	1.82163
19.8357	1.36937	1.07695	1.74117
22.3819	1.19904	0.932691	1.54145
22.3819	1.19904	0.932691	1.54145
0.123203	1.62013	0.5	5.49464
22.3819	1.19904	0.932691	1.54145
15.2334	1.62407	1.22869	2.1467
22.3819	1.19904	0.932691	1.54145
22.3819	1.19904	0.932691	1.54145
22.0068	1.2217	0.954767	1.56327
22.3819	1.19904	0.932691	1.54145
22.2998	1.2039	0.937501	1.54601
19.5674	1.3878	1.09004	1.76689
22.0041	1.22187	0.954929	1.56344
22.2998	1.2039	0.937501	1.54601
22.2998	1.2039	0.937501	1.54601
22.2998	1.2039	0.937501	1.54601
22.2998	1.2039	0.937501	1.54601
22.2998	1.2039	0.937501	1.54601
22.2998	1.2039	0.937501	1.54601
22.2998	1.2039	0.937501	1.54601
22.2998	1.2039	0.937501	1.54601
22.2998	1.2039	0.937501	1.54601
22.2149	1.20899	0.942487	1.55084
22.2149	1.20899	0.942487	1.55084
13.9165	1.67341	1.25056	2.23924
22.2149	1.20899	0.942487	1.55084
1.34155	1.51122	0.910397	2.50856
22.2149	1.20899	0.942487	1.55084
22.13	1.21413	0.947487	1.55581
22.13	1.21413	0.947487	1.55581
22.13	1.21413	0.947487	1.55581
22.13	1.21413	0.947487	1.55581
22.13	1.21413	0.947487	1.55581
22.13	1.21413	0.947487	1.55581
22.13	1.21413	0.947487	1.55581
22.13	1.21413	0.947487	1.55581
3.44148	1.57161	1.06417	2.32102
22.13	1.21413	0.947487	1.55581
22.13	1.21413	0.947487	1.55581
22.13	1.21413	0.947487	1.55581
39.3812	0.760949	0.5	1.31389
39.3812	0.760949	0.5	1.31389
39.3812	0.760949	0.5	1.31389
39.3812	0.760949	0.5	1.31389
21.3361	1.26512	0.994525	1.60935
39.3812	0.760949	0.5	1.31389
22.13	1.21413	0.947487	1.55581
22.13	1.21413	0.947487	1.55581
22.13	1.21413	0.947487	1.55581
22.13	1.21413	0.947487	1.55581
22.13	1.21413	0.947487	1.55581
22.13	1.21413	0.947487	1.55581
22.13	1.21413	0.947487	1.55581
22.13	1.21413	0.947487	1.55581
22.13	1.21413	0.947487	1.55581
22.13	1.21413	0.947487	1.55581
22.13	1.21413	0.947487	1.55581
8.66804	1.71148	1.29755	2.25747
16.2053	1.5819	1.20757	2.07226
19.3155	1.40493	1.10191	1.79128
18.1793	1.4776	1.14886	1.90039
22.0479	1.21917	0.952338	1.56075
22.0479	1.21917	0.952338	1.56075
22.0479	1.21917	0.952338	1.56075
7.74812	1.69673	1.29064	2.2306
21.963	1.22443	0.957359	1.56599
17.9658	1.49019	1.15643	1.92027
21.963	1.22443	0.957359	1.56599
21.963	1.22443	0.957359	1.56599
21.963	1.22443	0.957359	1.56599
21.963	1.22443	0.957359	1.56599
21.963	1.22443	0.957359	1.56599
21.963	1.22443	0.957359	1.56599
21.963	1.22443	0.957359	1.56599
21.963	1.22443	0.957359	1.56599
15.0637	1.6309	1.23189	2.15913
21.8809	1.22957	0.962226	1.5712
21.8809	1.22957	0.962226	1.5712
0.837782	1.50808	0.867092	2.62292
21.8809	1.22957	0.962226	1.5712
21.8809	1.22957	0.962226	1.5712
20.4134	1.32926	1.04711	1.68743
21.8809	1.22957	0.962226	1.5712
21.8809	1.22957	0.962226	1.5712
21.8809	1.22957	0.962226	1.5712
21.8809	1.22957	0.962226	1.5712
21.8809	1.22957	0.962226	1.5712
17.0486	1.54058	1.18534	2.00228
21.796	1.23495	0.96726	1.57673
16.3477	1.57524	1.20408	2.06082
21.796	1.23495	0.96726	1.57673
21.796	1.23495	0.96726	1.57673
21.796	1.23495	0.96726	1.57673
21.796	1.23495	0.96726	1.57673
21.796	1.23495	0.96726	1.57673
21.796	1.23495	0.96726	1.57673
21.796	1.23495	0.96726	1.57673
12.1561	1.72217	1.27606	2.32423
15.8741	1.5969	1.21529	2.09833
21.796	1.23495	0.96726	1.57673
39.2991	0.762048	0.5	1.31439
39.2991	0.762048	0.5	1.31439
39.2991	0.762048	0.5	1.31439
22.2861	1.20472	0.938304	1.54678
39.2991	0.762048	0.5	1.31439
39.2991	0.762048	0.5	1.31439
40.794	0.742644	0.5	1.30567
40.794	0.742644	0.5	1.30567
40.794	0.742644	0.5	1.30567
40.794	0.742644	0.5	1.30567
34.7488	0.831522	0.514897	1.34285
2.41478	1.53911	0.985125	2.40464
9.16906	1.71791	1.29811	2.27348
39.6331	0.757605	0.5	1.31239
28.0027	0.977485	0.685142	1.39457
39.6331	0.757605	0.5	1.31239
16.7584	1.55532	1.19343	2.02697
16.7584	1.55532	1.19343	2.02697
39.5483	0.758728	0.5	1.3129
39.5483	0.758728	0.5	1.3129
39.5483	0.758728	0.5	1.3129
39.5483	0.758728	0.5	1.3129
39.5483	0.758728	0.5	1.3129
39.5483	0.758728	0.5	1.3129
21.7112	1.24039	0.972296	1.5824
21.7112	1.24039	0.972296	1.5824
21.7112	1.24039	0.972296	1.5824
18.0315	1.48635	1.15414	1.91418
21.7112	1.24039	0.972296	1.5824
15.2115	1.62496	1.22911	2.14831
21.7112	1.24039	0.972296	1.5824
21.7112	1.24039	0.972296	1.5824
0.0410678	1.74143	0.5	11.6339
20.8104	1.30151	1.02518	1.65233
21.7112	1.24039	0.972296	1.5824
21.7112	1.24039	0.972296	1.5824
21.6318	1.24553	0.977008	1.58785
10.8611	1.73413	1.29063	2.33005
21.6318	1.24553	0.977008	1.58785
21.6318	1.24553	0.977008	1.58785
21.6318	1.24553	0.977008	1.58785
21.6318	1.24553	0.977008	1.58785
21.6318	1.24553	0.977008	1.58785
21.6318	1.24553	0.977008	1.58785
21.6318	1.24553	0.977008	1.58785
21.0924	1.2818	1.00887	1.62857
21.6318	1.24553	0.977008	1.58785
21.6318	1.24553	0.977008	1.58785
21.6318	1.24553	0.977008	1.58785
21.6318	1.24553	0.977008	1.58785
21.6318	1.24553	0.977008	1.58785
21.6318	1.24553	0.977008	1.58785
21.6318	1.24553	0.977008	1.58785
21.6318	1.24553	0.977008	1.58785
21.5469	1.25108	0.982043	1.59382
21.5469	1.25108	0.982043	1.59382
21.5469	1.25108	0.982043	1.59382
21.5469	1.25108	0.982043	1.59382
21.5469	1.25108	0.982043	1.59382
21.5469	1.25108	0.982043	1.59382
21.5469	1.25108	0.982043	1.59382
21.5469	1.25108	0.982043	1.59382
21.5469	1.25108	0.982043	1.59382
21.5469	1.25108	0.982043	1.59382
21.5469	1.25108	0.982043	1.59382
21.5469	1.25108	0.982043	1.59382
21.4648	1.25651	0.986911	1.59975
21.4648	1.25651	0.986911	1.59975
19.0856	1.42039	1.11241	1.81365
21.4648	1.25651	0.986911	1.59975
21.4648	1.25651	0.986911	1.59975
21.4648	1.25651	0.986911	1.59975
21.4648	1.25651	0.986911	1.59975
21.4648	1.25651	0.986911	1.59975
16.293	1.57782	1.20543	2.06524
21.4648	1.25651	0.986911	1.59975
21.4648	1.25651	0.986911	1.59975
21.4648	1.25651	0.986911	1.59975
39.2142	0.763187	0.5	1.3149
1.35524	1.51146	0.911345	2.50675
35.6687	0.815905	0.5	1.33698
28.7912	0.957029	0.660557	1.38656
28.2491	0.970976	0.677322	1.39194
39.2142	0.763187	0.5	1.3149
27.0472	1.00379	0.716595	1.40609
15.2553	1.62318	1.22826	2.14508
21.4319	1.25869	0.988857	1.60216
27.0472	1.00379	0.716595	1.40609
27.0472	1.00379	0.716595	1.40609
27.0472	1.00379	0.716595	1.40609
9.80151	1.72492	1.2967	2.29455
21.3799	1.26218	0.991935	1.60604
21.3799	1.26218	0.991935	1.60604
21.3799	1.26218	0.991935	1.60604
21.3799	1.26218	0.991935	1.60604
21.3799	1.26218	0.991935	1.60604
21.3799	1.26218	0.991935	1.60604
21.3799	1.26218	0.991935	1.60604
21.3799	1.26218	0.991935	1.60604
21.3799	1.26218	0.991935	1.60604
21.3799	1.26218	0.991935	1.60604
21.3799	1.26218	0.991935	1.60604
21.3799	1.26218	0.991935	1.60604
8.69268	1.71182	1.29762	2.25824
21.3799	1.26218	0.991935	1.60604
21.3799	1.26218	0.991935	1.60604
21.3799	1.26218	0.991935	1.60604
21.3799	1.26218	0.991935	1.60604
21.3799	1.26218	0.991935	1.60604
21.3799	1.26218	0.991935	1.60604
21.3799	1.26218	0.991935	1.60604
21.3799	1.26218	0.991935	1.60604
21.3799	1.26218	0.991935	1.60604
21.3799	1.26218	0.991935	1.60604
21.3799	1.26218	0.991935	1.60604
21.3799	1.26218	0.991935	1.60604
21.3799	1.26218	0.991935	1.60604
21.3799	1.26218	0.991935	1.60604
2.58179	1.54425	0.997581	2.3905
0.605065	1.51428	0.828085	2.76911
21.2977	1.26772	0.996789	1.61228
21.2977	1.26772	0.996789	1.61228
21.2977	1.26772	0.996789	1.61228
1.23203	1.5095	0.902636	2.52436
21.2977	1.26772	0.996789	1.61228
8.33949	1.70671	1.2961	2.24742
21.2977	1.26772	0.996789	1.61228
8.61054	1.71068	1.29736	2.25569
21.2977	1.26772	0.996789	1.61228
21.2977	1.26772	0.996789	1.61228
21.2977	1.26772	0.996789	1.61228
21.2977	1.26772	0.996789	1.61228
21.2129	1.2735	1.00179	1.61889
21.2129	1.2735	1.00179	1.61889
18.5955	1.4521	1.13306	1.86096
13.8344	1.6762	1.25182	2.24446
21.2129	1.2735	1.00179	1.61889
21.2129	1.2735	1.00179	1.61889
21.128	1.27934	1.00678	1.62568
14.9049	1.63715	1.23476	2.17066
21.128	1.27934	1.00678	1.62568
21.128	1.27934	1.00678	1.62568
21.128	1.27934	1.00678	1.62568
21.128	1.27934	1.00678	1.62568
21.128	1.27934	1.00678	1.62568
21.128	1.27934	1.00678	1.62568
12.271	1.71988	1.27452	2.32086
21.128	1.27934	1.00678	1.62568
21.128	1.27934	1.00678	1.62568
21.128	1.27934	1.00678	1.62568
1.35524	1.51146	0.911345	2.50675
1.35524	1.51146	0.911345	2.50675
35.6687	0.815905	0.5	1.33698
39.2142	0.763187	0.5	1.3149
31.7235	0.889477	0.580445	1.36304
39.2142	0.763187	0.5	1.3149
27.0472	1.00379	0.716595	1.40609
15.2553	1.62318	1.22826	2.14508
21.4319	1.25869	0.988857	1.60216
27.0472	1.00379	0.716595	1.40609
27.0472	1.00379	0.716595	1.40609
27.0472	1.00379	0.716595	1.40609
18.883	1.43372	1.12124	1.8333
21.0459	1.28504	1.0116	1.63241
21.0459	1.28504	1.0116	1.63241
21.0459	1.28504	1.0116	1.63241
21.0459	1.28504	1.0116	1.63241
21.0459	1.28504	1.0116	1.63241
21.0459	1.28504	1.0116	1.63241
21.0459	1.28504	1.0116	1.63241
14.3765	1.6571	1.24343	2.2084
21.0459	1.28504	1.0116	1.63241
21.0459	1.28504	1.0116	1.63241
21.0459	1.28504	1.0116	1.63241
21.0459	1.28504	1.0116	1.63241
21.0459	1.28504	1.0116	1.63241
21.0459	1.28504	1.0116	1.63241
21.0459	1.28504	1.0116	1.63241
21.0459	1.28504	1.0116	1.63241
21.0459	1.28504	1.0116	1.63241
20.961	1.29098	1.01654	1.63951
20.961	1.29098	1.01654	1.63951
20.961	1.29098	1.01654	1.63951
20.961	1.29098	1.01654	1.63951
20.961	1.29098	1.01654	1.63951
20.961	1.29098	1.01654	1.63951
17.2923	1.52776	1.17818	1.98107
20.961	1.29098	1.01654	1.63951
20.961	1.29098	1.01654	1.63951
20.961	1.29098	1.01654	1.63951
13.4456	1.68886	1.2577	2.26785
20.961	1.29098	1.01654	1.63951
20.961	1.29098	1.01654	1.63951
20.961	1.29098	1.01654	1.63951
20.961	1.29098	1.01654	1.63951
20.961	1.29098	1.01654	1.63951
20.961	1.29098	1.01654	1.63951
20.961	1.29098	1.01654	1.63951
20.961	1.29098	1.01654	1.63951
20.961	1.29098	1.01654	1.63951
20.961	1.29098	1.01654	1.63951
20.961	1.29098	1.01654	1.63951
20.961	1.29098	1.01654	1.63951
20.1999	1.34414	1.05842	1.70698
10.6119	1.73267	1.29248	2.32278
20.8789	1.29673	1.02128	1.64647
20.8789	1.29673	1.02128	1.64647
20.8789	1.29673	1.02128	1.64647
20.8789	1.29673	1.02128	1.64647
20.8789	1.29673	1.02128	1.64647
20.8789	1.29673	1.02128	1.64647
[truncated: 2,723 more rows]

## Sheet: 2C
_t	hr	hr_lci	hr_uci
40.4654	0.688806	0.5	1.19974
40.4654	0.688806	0.5	1.19974
5.80972	1.50395	1.16356	1.9439
40.4654	0.688806	0.5	1.19974
40.4654	0.688806	0.5	1.19974
40.4654	0.688806	0.5	1.19974
36.7091	0.727402	0.5	1.21322
36.7091	0.727402	0.5	1.21322
36.7091	0.727402	0.5	1.21322
36.7091	0.727402	0.5	1.21322
36.7091	0.727402	0.5	1.21322
10.3299	1.48336	1.1731	1.87567
36.6324	0.728304	0.5	1.21347
36.6324	0.728304	0.5	1.21347
36.6324	0.728304	0.5	1.21347
36.6324	0.728304	0.5	1.21347
35.0582	0.748002	0.5	1.21841
35.0965	0.747494	0.5	1.2183
36.5476	0.729309	0.5	1.21375
36.5476	0.729309	0.5	1.21375
36.5476	0.729309	0.5	1.21375
36.5476	0.729309	0.5	1.21375
36.5476	0.729309	0.5	1.21375
36.5476	0.729309	0.5	1.21375
36.3806	0.731304	0.5	1.21429
25.4839	0.935433	0.69396	1.26093
36.3806	0.731304	0.5	1.21429
36.3806	0.731304	0.5	1.21429
36.3806	0.731304	0.5	1.21429
36.3806	0.731304	0.5	1.21429
36.3806	0.731304	0.5	1.21429
25.6674	0.930333	0.687455	1.25902
36.3806	0.731304	0.5	1.21429
34.5845	0.754392	0.5	1.21983
24.3532	0.968671	0.735611	1.27557
36.3806	0.731304	0.5	1.21429
36.2984	0.732294	0.5	1.21455
24.0192	0.979116	0.748347	1.28105
4.21629	1.53135	1.11798	2.09756
36.2984	0.732294	0.5	1.21455
26.0616	0.919631	0.673736	1.25527
36.2984	0.732294	0.5	1.21455
20.501	1.12387	0.902828	1.39903
36.2984	0.732294	0.5	1.21455
36.2984	0.732294	0.5	1.21455
36.1916	0.733591	0.5	1.21489
36.2984	0.732294	0.5	1.21455
36.2984	0.732294	0.5	1.21455
36.2136	0.733324	0.5	1.21482
22.8145	1.0211	0.797633	1.30717
36.2136	0.733324	0.5	1.21482
36.2136	0.733324	0.5	1.21482
31.2526	0.806381	0.52885	1.22955
36.2136	0.733324	0.5	1.21482
36.2136	0.733324	0.5	1.21482
24.4162	0.966735	0.733229	1.27461
32.3203	0.788272	0.506666	1.22639
32.5229	0.784999	0.502708	1.22581
24.4162	0.966735	0.733229	1.27461
14.9788	1.39701	1.10142	1.77191
40.3806	0.689581	0.5	1.20005
40.3806	0.689581	0.5	1.20005
40.3806	0.689581	0.5	1.20005
6.83094	1.49217	1.18107	1.8852
40.3806	0.689581	0.5	1.20005
40.3806	0.689581	0.5	1.20005
36.1287	0.73436	0.5	1.2151
36.1287	0.73436	0.5	1.2151
31.3484	0.804694	0.526766	1.22926
36.1287	0.73436	0.5	1.2151
36.1287	0.73436	0.5	1.2151
36.1287	0.73436	0.5	1.2151
36.0465	0.735369	0.5	1.21536
36.0465	0.735369	0.5	1.21536
31.0883	0.8093	0.532469	1.23006
36.0465	0.735369	0.5	1.21536
36.0465	0.735369	0.5	1.21536
36.0465	0.735369	0.5	1.21536
36.0465	0.735369	0.5	1.21536
36.0465	0.735369	0.5	1.21536
36.0465	0.735369	0.5	1.21536
36.0465	0.735369	0.5	1.21536
36.0465	0.735369	0.5	1.21536
29.2594	0.84445	0.576771	1.23636
36.0465	0.735369	0.5	1.21536
36.0465	0.735369	0.5	1.21536
19.8549	1.15765	0.931878	1.43812
36.0465	0.735369	0.5	1.21536
17.1718	1.30503	1.03821	1.64042
36.0465	0.735369	0.5	1.21536
36.0465	0.735369	0.5	1.21536
32.6817	0.782469	0.5	1.22535
36.0465	0.735369	0.5	1.21536
36.0465	0.735369	0.5	1.21536
36.0465	0.735369	0.5	1.21536
29.2594	0.84445	0.576771	1.23636
35.9617	0.736418	0.5	1.21562
20.835	1.10724	0.887498	1.38138
0.249144	1.95074	0.763159	4.98638
35.9617	0.736418	0.5	1.21562
35.9617	0.736418	0.5	1.21562
35.9617	0.736418	0.5	1.21562
35.8795	0.737439	0.5	1.21588
35.8795	0.737439	0.5	1.21588
33.0404	0.776865	0.5	1.22432
35.8795	0.737439	0.5	1.21588
24.2793	0.970957	0.738415	1.27673
35.8795	0.737439	0.5	1.21588
35.8795	0.737439	0.5	1.21588
35.8795	0.737439	0.5	1.21588
35.8795	0.737439	0.5	1.21588
35.8795	0.737439	0.5	1.21588
34.8939	0.750192	0.5	1.21891
35.8795	0.737439	0.5	1.21588
35.7947	0.738501	0.5	1.21615
30.2012	0.825724	0.553012	1.23292
35.7947	0.738501	0.5	1.21615
35.7947	0.738501	0.5	1.21615
35.7947	0.738501	0.5	1.21615
35.7947	0.738501	0.5	1.21615
40.2984	0.690333	0.5	1.20036
32.1971	0.790287	0.509111	1.22675
40.2984	0.690333	0.5	1.20036
29.7522	0.834479	0.564081	1.2345
40.2984	0.690333	0.5	1.20036
40.2984	0.690333	0.5	1.20036
35.7098	0.73957	0.5	1.21641
35.7098	0.73957	0.5	1.21641
35.7098	0.73957	0.5	1.21641
35.7098	0.73957	0.5	1.21641
26.5845	0.905963	0.656119	1.25095
35.7098	0.73957	0.5	1.21641
22.1711	1.04673	0.826095	1.32629
35.5483	0.741622	0.5	1.21692
35.5483	0.741622	0.5	1.21692
35.5483	0.741622	0.5	1.21692
35.5483	0.741622	0.5	1.21692
35.5483	0.741622	0.5	1.21692
35.4661	0.742675	0.5	1.21717
35.4661	0.742675	0.5	1.21717
35.4661	0.742675	0.5	1.21717
35.4661	0.742675	0.5	1.21717
35.4661	0.742675	0.5	1.21717
28.6817	0.856642	0.59239	1.23877
35.4661	0.742675	0.5	1.21717
35.4661	0.742675	0.5	1.21717
35.4661	0.742675	0.5	1.21717
10.5352	1.48308	1.17057	1.87904
19.0034	1.20504	0.968277	1.4997
35.4661	0.742675	0.5	1.21717
35.2991	0.744837	0.5	1.21768
25.1198	0.945793	0.707095	1.26507
35.2991	0.744837	0.5	1.21768
28.846	0.853118	0.587865	1.23806
35.2991	0.744837	0.5	1.21768
35.2991	0.744837	0.5	1.21768
31.0062	0.810774	0.534299	1.23031
35.2991	0.744837	0.5	1.21768
35.2991	0.744837	0.5	1.21768
31.7399	0.797932	0.518443	1.22809
31.3347	0.804934	0.527062	1.2293
35.2991	0.744837	0.5	1.21768
14.0753	1.42499	1.12081	1.81172
34.8802	0.750376	0.5	1.21895
34.8802	0.750376	0.5	1.21895
34.8802	0.750376	0.5	1.21895
3.50171	1.54915	1.09651	2.18865
24.7775	0.955823	0.71969	1.26943
34.8802	0.750376	0.5	1.21895
34.8802	0.750376	0.5	1.21895
34.8802	0.750376	0.5	1.21895
34.8802	0.750376	0.5	1.21895
34.8802	0.750376	0.5	1.21895
30.9952	0.810971	0.534545	1.23035
34.7953	0.75152	0.5	1.21921
4.41615	1.52712	1.12419	2.07448
22.2478	1.04355	0.822644	1.32379
6.6694	1.49363	1.17904	1.89216
34.7953	0.75152	0.5	1.21921
34.7953	0.75152	0.5	1.21921
34.7953	0.75152	0.5	1.21921
28.2409	0.866329	0.604861	1.24082
31.2498	0.806429	0.52891	1.22956
34.7953	0.75152	0.5	1.21921
34.7953	0.75152	0.5	1.21921
27.2498	0.889402	0.634693	1.24633
30.2478	0.824834	0.551891	1.23276
34.7105	0.75267	0.5	1.21946
34.7105	0.75267	0.5	1.21946
26.9979	0.895566	0.642673	1.24797
34.7105	0.75267	0.5	1.21946
34.7105	0.75267	0.5	1.21946
34.6338	0.753716	0.5	1.21969
28.7584	0.854992	0.59027	1.23843
34.6338	0.753716	0.5	1.21969
34.6338	0.753716	0.5	1.21969
24.6188	0.960577	0.72561	1.27163
34.6338	0.753716	0.5	1.21969
40.2984	0.690333	0.5	1.20036
40.2984	0.690333	0.5	1.20036
40.2984	0.690333	0.5	1.20036
37.9822	0.713141	0.5	1.20891
40.2984	0.690333	0.5	1.20036
40.2984	0.690333	0.5	1.20036
26.59	0.905823	0.655938	1.25091
34.6338	0.753716	0.5	1.21969
34.6338	0.753716	0.5	1.21969
7.40862	1.48826	1.18632	1.86704
34.6338	0.753716	0.5	1.21969
34.6338	0.753716	0.5	1.21969
9.42368	1.48369	1.18247	1.86164
34.6338	0.753716	0.5	1.21969
21.1718	1.09107	0.871941	1.36526
34.6338	0.753716	0.5	1.21969
14.9596	1.39766	1.10187	1.77284
20.3395	1.13212	0.910179	1.40818
34.6338	0.753716	0.5	1.21969
21.9357	1.05668	0.836773	1.33437
34.6338	0.753716	0.5	1.21969
30.7598	0.815252	0.539877	1.23109
34.6338	0.753716	0.5	1.21969
34.6338	0.753716	0.5	1.21969
31.8385	0.796261	0.516397	1.2278
34.5489	0.754881	0.5	1.21994
34.5489	0.754881	0.5	1.21994
34.5489	0.754881	0.5	1.21994
34.5489	0.754881	0.5	1.21994
34.5489	0.754881	0.5	1.21994
19.5072	1.17665	0.947039	1.46192
34.4668	0.756015	0.5	1.22018
34.4668	0.756015	0.5	1.22018
34.4668	0.756015	0.5	1.22018
34.4668	0.756015	0.5	1.22018
34.4668	0.756015	0.5	1.22018
34.3819	0.757194	0.5	1.22043
34.3819	0.757194	0.5	1.22043
28.7036	0.856169	0.591783	1.23867
34.3819	0.757194	0.5	1.22043
34.3819	0.757194	0.5	1.22043
34.3819	0.757194	0.5	1.22043
34.2998	0.758343	0.5	1.22067
34.2998	0.758343	0.5	1.22067
34.2998	0.758343	0.5	1.22067
34.2998	0.758343	0.5	1.22067
34.2998	0.758343	0.5	1.22067
20.3395	1.13212	0.910179	1.40818
22.9624	1.01553	0.791277	1.30334
34.2149	0.759537	0.5	1.22092
34.2149	0.759537	0.5	1.22092
34.2149	0.759537	0.5	1.22092
34.2149	0.759537	0.5	1.22092
34.2149	0.759537	0.5	1.22092
11.2142	1.47891	1.1616	1.88291
34.13	0.760739	0.5	1.22117
34.13	0.760739	0.5	1.22117
20.5804	1.11986	0.899198	1.39468
30.2286	0.8252	0.552352	1.23283
27.9261	0.87346	0.614068	1.24242
8.83504	1.4842	1.18653	1.85656
40.2136	0.691113	0.5	1.20068
29.4127	0.841306	0.572761	1.23576
28.1615	0.86811	0.607159	1.24121
33.399	0.771411	0.5	1.22329
36.1588	0.733992	0.5	1.215
32.9856	0.777711	0.5	1.22448
34.13	0.760739	0.5	1.22117
34.13	0.760739	0.5	1.22117
34.13	0.760739	0.5	1.22117
34.13	0.760739	0.5	1.22117
34.13	0.760739	0.5	1.22117
34.13	0.760739	0.5	1.22117
34.13	0.760739	0.5	1.22117
26.8364	0.899587	0.647875	1.24909
34.13	0.760739	0.5	1.22117
1.8371	1.62186	1.06501	2.46985
34.13	0.760739	0.5	1.22117
34.13	0.760739	0.5	1.22117
34.13	0.760739	0.5	1.22117
34.13	0.760739	0.5	1.22117
34.13	0.760739	0.5	1.22117
31.7426	0.797886	0.518386	1.22808
21.2977	1.08518	0.866115	1.35964
33.963	0.763125	0.5	1.22166
33.963	0.763125	0.5	1.22166
33.963	0.763125	0.5	1.22166
33.963	0.763125	0.5	1.22166
15.7262	1.36966	1.08258	1.73287
33.963	0.763125	0.5	1.22166
23.0883	1.01088	0.785925	1.30023
1.50034	1.64811	1.06256	2.55634
32.7529	0.781345	0.5	1.22515
33.963	0.763125	0.5	1.22166
33.963	0.763125	0.5	1.22166
33.963	0.763125	0.5	1.22166
23.5811	0.9935	0.765576	1.28928
33.5031	0.769856	0.5	1.22299
33.8809	0.76431	0.5	1.2219
28.8624	0.852768	0.587417	1.23799
25.7632	0.927699	0.684087	1.25807
33.8809	0.76431	0.5	1.2219
28.1697	0.867925	0.606921	1.24117
33.8809	0.76431	0.5	1.2219
29.0185	0.849467	0.583186	1.23733
33.8809	0.76431	0.5	1.2219
9.75496	1.48353	1.17942	1.86604
33.8809	0.76431	0.5	1.2219
33.796	0.765542	0.5	1.22214
18.204	1.24984	0.999879	1.5623
33.796	0.765542	0.5	1.22214
33.796	0.765542	0.5	1.22214
33.796	0.765542	0.5	1.22214
33.796	0.765542	0.5	1.22214
33.7112	0.766782	0.5	1.22239
33.7112	0.766782	0.5	1.22239
33.7112	0.766782	0.5	1.22239
33.7112	0.766782	0.5	1.22239
33.7112	0.766782	0.5	1.22239
33.7112	0.766782	0.5	1.22239
7.41684	1.48821	1.18637	1.86685
40.2136	0.691113	0.5	1.20068
40.2136	0.691113	0.5	1.20068
40.2136	0.691113	0.5	1.20068
40.2136	0.691113	0.5	1.20068
40.2136	0.691113	0.5	1.20068
33.588	0.768596	0.5	1.22275
29.6728	0.83606	0.566087	1.23479
24.7201	0.957537	0.721828	1.27022
33.6318	0.76795	0.5	1.22262
33.6318	0.76795	0.5	1.22262
33.6318	0.76795	0.5	1.22262
33.5469	0.769205	0.5	1.22286
18.9158	1.21001	0.971861	1.50652
33.5469	0.769205	0.5	1.22286
33.5469	0.769205	0.5	1.22286
33.5469	0.769205	0.5	1.22286
33.5469	0.769205	0.5	1.22286
33.128	0.775519	0.5	1.22407
33.128	0.775519	0.5	1.22407
27.8357	0.87554	0.616756	1.24291
33.128	0.775519	0.5	1.22407
26.5818	0.906034	0.656209	1.25097
33.128	0.775519	0.5	1.22407
33.128	0.775519	0.5	1.22407
33.128	0.775519	0.5	1.22407
21.0842	1.09521	0.875993	1.3693
20.1068	1.14424	0.920673	1.42209
15.1403	1.39142	1.09756	1.76396
33.128	0.775519	0.5	1.22407
33.128	0.775519	0.5	1.22407
33.128	0.775519	0.5	1.22407
33.128	0.775519	0.5	1.22407
28.2382	0.86639	0.60494	1.24084
33.128	0.775519	0.5	1.22407
22.3299	1.04019	0.818962	1.32118
33.0459	0.776781	0.5	1.22431
26.5763	0.906174	0.65639	1.25101
33.0459	0.776781	0.5	1.22431
33.0459	0.776781	0.5	1.22431
33.0459	0.776781	0.5	1.22431
33.0459	0.776781	0.5	1.22431
33.0459	0.776781	0.5	1.22431
33.0459	0.776781	0.5	1.22431
33.0459	0.776781	0.5	1.22431
33.0459	0.776781	0.5	1.22431
32.9309	0.77856	0.5	1.22464
33.0459	0.776781	0.5	1.22431
27.6687	0.879424	0.62178	1.24383
32.961	0.778093	0.5	1.22455
32.961	0.778093	0.5	1.22455
0.84052	1.73217	1.03661	2.89446
32.961	0.778093	0.5	1.22455
32.961	0.778093	0.5	1.22455
40.1287	0.691896	0.5	1.201
40.1287	0.691896	0.5	1.201
40.1287	0.691896	0.5	1.201
40.1287	0.691896	0.5	1.201
40.1287	0.691896	0.5	1.201
40.1287	0.691896	0.5	1.201
32.8789	0.77937	0.5	1.22479
32.8789	0.77937	0.5	1.22479
6.32444	1.49741	1.17391	1.91005
32.8789	0.77937	0.5	1.22479
30.5845	0.818489	0.543924	1.23165
32.8789	0.77937	0.5	1.22479
11.8631	1.47111	1.15283	1.87725
32.7091	0.782036	0.5	1.22527
32.7091	0.782036	0.5	1.22527
32.7091	0.782036	0.5	1.22527
20.282	1.13509	0.912783	1.41154
32.7091	0.782036	0.5	1.22527
32.5476	0.784605	0.502231	1.22574
32.5476	0.784605	0.502231	1.22574
32.5476	0.784605	0.502231	1.22574
32.5476	0.784605	0.502231	1.22574
24.2546	0.971722	0.739352	1.27712
32.5476	0.784605	0.502231	1.22574
32.4654	0.785923	0.503823	1.22598
32.4654	0.785923	0.503823	1.22598
22.5435	1.03162	0.809476	1.31472
32.4654	0.785923	0.503823	1.22598
32.4654	0.785923	0.503823	1.22598
32.4654	0.785923	0.503823	1.22598
31.3676	0.804359	0.526351	1.2292
32.4654	0.785923	0.503823	1.22598
32.4654	0.785923	0.503823	1.22598
32.4654	0.785923	0.503823	1.22598
32.4654	0.785923	0.503823	1.22598
22.0014	1.05387	0.833782	1.33205
23.6222	0.992109	0.763925	1.28845
20.5914	1.11931	0.898696	1.39409
32.4654	0.785923	0.503823	1.22598
32.4654	0.785923	0.503823	1.22598
32.4654	0.785923	0.503823	1.22598
32.4654	0.785923	0.503823	1.22598
22.6886	1.02594	0.803106	1.31059
32.3806	0.787294	0.505481	1.22622
32.3806	0.787294	0.505481	1.22622
32.3806	0.787294	0.505481	1.22622
32.3806	0.787294	0.505481	1.22622
32.3806	0.787294	0.505481	1.22622
32.3806	0.787294	0.505481	1.22622
0.260096	1.94206	0.776322	4.85829
23.05	1.01229	0.787548	1.30116
32.3806	0.787294	0.505481	1.22622
32.3806	0.787294	0.505481	1.22622
32.3806	0.787294	0.505481	1.22622
40.0465	0.692655	0.5	1.20131
40.0465	0.692655	0.5	1.20131
40.0465	0.692655	0.5	1.20131
40.0465	0.692655	0.5	1.20131
40.0465	0.692655	0.5	1.20131
33.9986	0.762614	0.5	1.22156
22.6557	1.02721	0.804543	1.31151
26.8392	0.899518	0.647786	1.24907
32.2984	0.788629	0.507099	1.22646
0.668036	1.76912	1.00822	3.10428
16.0575	1.35628	1.07341	1.71368
32.2984	0.788629	0.507099	1.22646
32.1287	0.791415	0.510482	1.22695
32.1287	0.791415	0.510482	1.22695
32.1287	0.791415	0.510482	1.22695
0.150582	2.05739	0.608912	6.95152
1.25394	1.67273	1.0593	2.64139
32.1287	0.791415	0.510482	1.22695
32.1287	0.791415	0.510482	1.22695
32.1287	0.791415	0.510482	1.22695
32.1287	0.791415	0.510482	1.22695
32.1287	0.791415	0.510482	1.22695
25.1691	0.944373	0.705301	1.26448
32.1287	0.791415	0.510482	1.22695
31.9617	0.794191	0.513866	1.22744
31.9617	0.794191	0.513866	1.22744
11.7892	1.47215	1.15383	1.8783
31.9617	0.794191	0.513866	1.22744
31.9617	0.794191	0.513866	1.22744
19.5619	1.17362	0.944677	1.45804
31.9617	0.794191	0.513866	1.22744
31.9617	0.794191	0.513866	1.22744
31.9617	0.794191	0.513866	1.22744
31.9617	0.794191	0.513866	1.22744
8.91718	1.48411	1.18608	1.85703
31.9617	0.794191	0.513866	1.22744
31.8795	0.795569	0.51555	1.22768
20.3888	1.12959	0.907941	1.40535
31.8795	0.795569	0.51555	1.22768
27.5921	0.881225	0.62411	1.24426
8.5859	1.48455	1.18762	1.85573
31.8795	0.795569	0.51555	1.22768
31.8795	0.795569	0.51555	1.22768
8.83504	1.4842	1.18653	1.85656
31.8795	0.795569	0.51555	1.22768
31.8795	0.795569	0.51555	1.22768
31.8795	0.795569	0.51555	1.22768
23.3539	1.00135	0.774837	1.29409
31.7947	0.797002	0.517304	1.22793
31.7947	0.797002	0.517304	1.22793
25.4949	0.935127	0.69357	1.26081
31.7947	0.797002	0.517304	1.22793
31.7947	0.797002	0.517304	1.22793
31.7947	0.797002	0.517304	1.22793
40.0465	0.692655	0.5	1.20131
40.0465	0.692655	0.5	1.20131
9.37166	1.48372	1.1829	1.86104
40.0465	0.692655	0.5	1.20131
40.0465	0.692655	0.5	1.20131
25.9192	0.923455	0.678648	1.25657
31.7947	0.797002	0.517304	1.22793
22.2861	1.04198	0.820924	1.32256
25.8617	0.925012	0.680645	1.25711
31.7947	0.797002	0.517304	1.22793
31.7947	0.797002	0.517304	1.22793
31.7947	0.797002	0.517304	1.22793
31.7098	0.798445	0.519072	1.22818
31.7098	0.798445	0.519072	1.22818
31.7098	0.798445	0.519072	1.22818
31.7098	0.798445	0.519072	1.22818
26.319	0.912831	0.664982	1.25306
31.7098	0.798445	0.519072	1.22818
31.6331	0.799756	0.520682	1.22841
31.6331	0.799756	0.520682	1.22841
31.6331	0.799756	0.520682	1.22841
31.6331	0.799756	0.520682	1.22841
31.6331	0.799756	0.520682	1.22841
30.809	0.81435	0.538751	1.23093
31.2142	0.807059	0.52969	1.22967
31.2142	0.807059	0.52969	1.22967
31.2142	0.807059	0.52969	1.22967
31.2142	0.807059	0.52969	1.22967
28.0465	0.87071	0.610516	1.2418
25.7796	0.92725	0.683512	1.2579
31.1294	0.808567	0.531559	1.22993
31.1294	0.808567	0.531559	1.22993
29.8125	0.833287	0.562569	1.23428
30.6064	0.818082	0.543415	1.23158
31.1294	0.808567	0.531559	1.22993
31.1294	0.808567	0.531559	1.22993
31.0472	0.810036	0.533382	1.23018
31.0472	0.810036	0.533382	1.23018
31.0472	0.810036	0.533382	1.23018
31.0472	0.810036	0.533382	1.23018
31.0472	0.810036	0.533382	1.23018
31.0472	0.810036	0.533382	1.23018
31.0472	0.810036	0.533382	1.23018
31.0472	0.810036	0.533382	1.23018
0.928131	1.71685	1.04503	2.82056
21.9877	1.05445	0.834405	1.33253
31.0472	0.810036	0.533382	1.23018
22.8364	1.02027	0.796687	1.30659
30.1164	0.827356	0.555069	1.23321
38.6858	0.705812	0.5	1.2064
40.0465	0.692655	0.5	1.20131
40.0465	0.692655	0.5	1.20131
40.0465	0.692655	0.5	1.20131
40.0465	0.692655	0.5	1.20131
31.0472	0.810036	0.533382	1.23018
31.0472	0.810036	0.533382	1.23018
31.0472	0.810036	0.533382	1.23018
31.0472	0.810036	0.533382	1.23018
31.0472	0.810036	0.533382	1.23018
2.07255	1.607	1.06711	2.42003
24.4627	0.965311	0.731473	1.2739
30.9624	0.811564	0.535282	1.23045
30.9624	0.811564	0.535282	1.23045
30.089	0.827884	0.555736	1.23331
30.9624	0.811564	0.535282	1.23045
30.9624	0.811564	0.535282	1.23045
30.9624	0.811564	0.535282	1.23045
30.9624	0.811564	0.535282	1.23045
30.9624	0.811564	0.535282	1.23045
30.9624	0.811564	0.535282	1.23045
21.5003	1.07588	0.856755	1.35106
30.9624	0.811564	0.535282	1.23045
29.5633	0.838256	0.568878	1.23519
30.8802	0.813052	0.537134	1.23071
0.0848734	2.18958	0.5	10.6364
30.8802	0.813052	0.537134	1.23071
30.8802	0.813052	0.537134	1.23071
22.8775	1.01871	0.794917	1.30552
30.5489	0.819152	0.544754	1.23177
30.5489	0.819152	0.544754	1.23177
0.791239	1.74169	1.03037	2.94406
30.5489	0.819152	0.544754	1.23177
30.5489	0.819152	0.544754	1.23177
30.5489	0.819152	0.544754	1.23177
15.0746	1.39372	1.09915	1.76723
30.2998	0.823843	0.550644	1.23259
30.2998	0.823843	0.550644	1.23259
30.2998	0.823843	0.550644	1.23259
5.42642	1.50942	1.15398	1.97434
30.2998	0.823843	0.550644	1.23259
30.2149	0.825462	0.552682	1.23287
30.2149	0.825462	0.552682	1.23287
30.2149	0.825462	0.552682	1.23287
30.2149	0.825462	0.552682	1.23287
30.2149	0.825462	0.552682	1.23287
30.2149	0.825462	0.552682	1.23287
30.13	0.827092	0.554736	1.23316
30.13	0.827092	0.554736	1.23316
30.13	0.827092	0.554736	1.23316
28.4873	0.860872	0.59783	1.23965
30.13	0.827092	0.554736	1.23316
21.8371	1.06093	0.841275	1.33795
30.13	0.827092	0.554736	1.23316
22.0726	1.05086	0.830551	1.3296
30.13	0.827092	0.554736	1.23316
30.13	0.827092	0.554736	1.23316
27.2745	0.888805	0.633921	1.24617
30.13	0.827092	0.554736	1.23316
30.13	0.827092	0.554736	1.23316
30.13	0.827092	0.554736	1.23316
30.13	0.827092	0.554736	1.23316
30.13	0.827092	0.554736	1.23316
30.13	0.827092	0.554736	1.23316
19.3648	1.18458	0.953134	1.47223
39.8795	0.694207	0.5	1.20195
22.4942	1.03357	0.811654	1.31617
39.8795	0.694207	0.5	1.20195
38.6694	0.705978	0.5	1.20646
39.8795	0.694207	0.5	1.20195
39.8795	0.694207	0.5	1.20195
30.0479	0.828679	0.55674	1.23345
29.4565	0.840415	0.571626	1.23559
30.0479	0.828679	0.55674	1.23345
30.0479	0.828679	0.55674	1.23345
30.0479	0.828679	0.55674	1.23345
24.8378	0.954037	0.717456	1.26863
29.963	0.83033	0.558826	1.23374
16.8296	1.32184	1.04983	1.66434
29.963	0.83033	0.558826	1.23374
28.167	0.867987	0.607	1.24119
29.963	0.83033	0.558826	1.23374
8.16701	1.48541	1.18848	1.85653
29.796	0.833611	0.562981	1.23434
29.796	0.833611	0.562981	1.23434
29.796	0.833611	0.562981	1.23434
29.796	0.833611	0.562981	1.23434
29.796	0.833611	0.562981	1.23434
29.796	0.833611	0.562981	1.23434
18.3381	1.24242	0.994726	1.55179
9.41547	1.4837	1.18254	1.86155
29.7112	0.835295	0.565117	1.23464
29.7112	0.835295	0.565117	1.23464
29.7112	0.835295	0.565117	1.23464
19.6386	1.1694	0.941354	1.4527
29.6318	0.836881	0.56713	1.23494
27.2416	0.889601	0.634951	1.24638
16.6352	1.33096	1.05608	1.67738
29.6318	0.836881	0.56713	1.23494
29.6318	0.836881	0.56713	1.23494
29.6318	0.836881	0.56713	1.23494
29.6318	0.836881	0.56713	1.23494
29.6318	0.836881	0.56713	1.23494
28.3778	0.863284	0.600936	1.24016
29.6318	0.836881	0.56713	1.23494
22.9185	1.01717	0.793152	1.30446
29.6318	0.836881	0.56713	1.23494
29.6318	0.836881	0.56713	1.23494
18.3299	1.24288	0.995043	1.55244
29.6318	0.836881	0.56713	1.23494
29.6318	0.836881	0.56713	1.23494
29.6318	0.836881	0.56713	1.23494
29.6318	0.836881	0.56713	1.23494
39.7947	0.695	0.5	1.20227
39.7947	0.695	0.5	1.20227
24.2245	0.97266	0.740498	1.27761
39.7947	0.695	0.5	1.20227
39.7947	0.695	0.5	1.20227
39.7947	0.695	0.5	1.20227
29.6318	0.836881	0.56713	1.23494
29.6318	0.836881	0.56713	1.23494
29.6318	0.836881	0.56713	1.23494
29.6318	0.836881	0.56713	1.23494
29.6318	0.836881	0.56713	1.23494
29.6318	0.836881	0.56713	1.23494
29.5469	0.838587	0.569299	1.23525
29.5469	0.838587	0.569299	1.23525
29.5469	0.838587	0.569299	1.23525
29.5469	0.838587	0.569299	1.23525
29.5469	0.838587	0.569299	1.23525
4.08487	1.53428	1.11391	2.1133
29.5469	0.838587	0.569299	1.23525
19.3867	1.18335	0.9522	1.47062
29.5469	0.838587	0.569299	1.23525
29.5469	0.838587	0.569299	1.23525
29.5469	0.838587	0.569299	1.23525
29.5469	0.838587	0.569299	1.23525
29.5469	0.838587	0.569299	1.23525
29.5469	0.838587	0.569299	1.23525
29.5469	0.838587	0.569299	1.23525
24.9884	0.949611	0.711904	1.26669
29.5469	0.838587	0.569299	1.23525
29.5469	0.838587	0.569299	1.23525
29.2977	0.84366	0.575763	1.23621
29.2977	0.84366	0.575763	1.23621
0.703628	1.76059	1.01576	3.05158
23.3374	1.00193	0.775515	1.29445
29.2977	0.84366	0.575763	1.23621
29.2977	0.84366	0.575763	1.23621
29.2977	0.84366	0.575763	1.23621
29.2977	0.84366	0.575763	1.23621
29.2977	0.84366	0.575763	1.23621
29.2977	0.84366	0.575763	1.23621
20.115	1.1438	0.920305	1.42158
29.2977	0.84366	0.575763	1.23621
29.2129	0.845411	0.577999	1.23654
29.2129	0.845411	0.577999	1.23654
29.2129	0.845411	0.577999	1.23654
29.2129	0.845411	0.577999	1.23654
29.2129	0.845411	0.577999	1.23654
29.2129	0.845411	0.577999	1.23654
29.128	0.847174	0.580253	1.23688
29.128	0.847174	0.580253	1.23688
29.128	0.847174	0.580253	1.23688
14.1437	1.42306	1.11948	1.80896
29.128	0.847174	0.580253	1.23688
29.128	0.847174	0.580253	1.23688
16.7036	1.32778	1.05391	1.67283
29.128	0.847174	0.580253	1.23688
16.9363	1.3167	1.04629	1.65701
28.2656	0.865778	0.604151	1.2407
28.5038	0.860512	0.597366	1.23957
16.5175	1.33633	1.05976	1.68507
29.0459	0.848892	0.58245	1.23722
18.9952	1.20551	0.968614	1.50034
29.0459	0.848892	0.58245	1.23722
0.11499	2.1182	0.530983	8.44992
29.0459	0.848892	0.58245	1.23722
29.0459	0.848892	0.58245	1.23722
39.7947	0.695	0.5	1.20227
39.7947	0.695	0.5	1.20227
39.7947	0.695	0.5	1.20227
27.7563	0.87738	0.619136	1.24334
39.7947	0.695	0.5	1.20227
39.7947	0.695	0.5	1.20227
29.0459	0.848892	0.58245	1.23722
23.3347	1.00203	0.775628	1.29452
29.0459	0.848892	0.58245	1.23722
16.4682	1.33854	1.06128	1.68825
29.0459	0.848892	0.58245	1.23722
29.0459	0.848892	0.58245	1.23722
28.961	0.850678	0.584738	1.23757
28.961	0.850678	0.584738	1.23757
28.961	0.850678	0.584738	1.23757
28.961	0.850678	0.584738	1.23757
28.961	0.850678	0.584738	1.23757
16.1725	1.35144	1.0701	1.70675
28.961	0.850678	0.584738	1.23757
28.961	0.850678	0.584738	1.23757
28.961	0.850678	0.584738	1.23757
23.9233	0.982178	0.752043	1.28274
28.961	0.850678	0.584738	1.23757
28.961	0.850678	0.584738	1.23757
24.3778	0.967913	0.734678	1.27519
28.961	0.850678	0.584738	1.23757
28.961	0.850678	0.584738	1.23757
0.435318	1.84345	0.921683	3.68707
28.961	0.850678	0.584738	1.23757
23.0253	1.0132	0.788594	1.30177
28.8789	0.852419	0.586968	1.23792
28.8789	0.852419	0.586968	1.23792
28.8789	0.852419	0.586968	1.23792
28.8789	0.852419	0.586968	1.23792
28.8789	0.852419	0.586968	1.23792
15.7728	1.36783	1.08132	1.73025
28.8789	0.852419	0.586968	1.23792
28.8789	0.852419	0.586968	1.23792
28.8789	0.852419	0.586968	1.23792
28.8789	0.852419	0.586968	1.23792
16.0219	1.35775	1.07442	1.7158
28.8789	0.852419	0.586968	1.23792
14.8337	1.40187	1.10479	1.77883
28.794	0.854229	0.589291	1.23828
28.794	0.854229	0.589291	1.23828
28.794	0.854229	0.589291	1.23828
28.794	0.854229	0.589291	1.23828
28.794	0.854229	0.589291	1.23828
39.7098	0.695797	0.5	1.20259
39.7098	0.695797	0.5	1.20259
39.7098	0.695797	0.5	1.20259
39.7098	0.695797	0.5	1.20259
39.7098	0.695797	0.5	1.20259
32.7502	0.781388	0.5	1.22516
28.6324	0.857708	0.59376	1.23899
28.6324	0.857708	0.59376	1.23899
28.6324	0.857708	0.59376	1.23899
28.6324	0.857708	0.59376	1.23899
20.5448	1.12166	0.900826	1.39662
28.6324	0.857708	0.59376	1.23899
28.5476	0.859554	0.596134	1.23937
28.5476	0.859554	0.596134	1.23937
28.5476	0.859554	0.596134	1.23937
28.5476	0.859554	0.596134	1.23937
28.5476	0.859554	0.596134	1.23937
28.5476	0.859554	0.596134	1.23937
28.5476	0.859554	0.596134	1.23937
28.5476	0.859554	0.596134	1.23937
19.0664	1.20147	0.965678	1.49482
28.5476	0.859554	0.596134	1.23937
28.5476	0.859554	0.596134	1.23937
18.1574	1.25241	1.00166	1.56593
23.551	0.994525	0.766791	1.2899
22.6612	1.027	0.804303	1.31136
28.4654	0.861352	0.598449	1.23975
15.3402	1.38427	1.09262	1.75376
28.4654	0.861352	0.598449	1.23975
28.4654	0.861352	0.598449	1.23975
28.4654	0.861352	0.598449	1.23975
28.4654	0.861352	0.598449	1.23975
28.4654	0.861352	0.598449	1.23975
21.0869	1.09508	0.875866	1.36917
28.4654	0.861352	0.598449	1.23975
28.4654	0.861352	0.598449	1.23975
28.4654	0.861352	0.598449	1.23975
28.4654	0.861352	0.598449	1.23975
28.4654	0.861352	0.598449	1.23975
28.4654	0.861352	0.598449	1.23975
28.4654	0.861352	0.598449	1.23975
14.2998	1.41855	1.11636	1.80253
28.3806	0.863223	0.600858	1.24015
28.3806	0.863223	0.600858	1.24015
28.3806	0.863223	0.600858	1.24015
28.3806	0.863223	0.600858	1.24015
28.3806	0.863223	0.600858	1.24015
28.3806	0.863223	0.600858	1.24015
28.2984	0.865046	0.603207	1.24054
28.2984	0.865046	0.603207	1.24054
28.2984	0.865046	0.603207	1.24054
28.2984	0.865046	0.603207	1.24054
22.2615	1.04299	0.822029	1.32335
28.2984	0.865046	0.603207	1.24054
28.2136	0.866942	0.605652	1.24096
28.2136	0.866942	0.605652	1.24096
28.2136	0.866942	0.605652	1.24096
28.2136	0.866942	0.605652	1.24096
28.2136	0.866942	0.605652	1.24096
22.3381	1.03986	0.818595	1.32092
28.2136	0.866942	0.605652	1.24096
28.2136	0.866942	0.605652	1.24096
21.6838	1.06766	0.848306	1.34374
28.2136	0.866942	0.605652	1.24096
24.5777	0.961817	0.727149	1.27222
28.2136	0.866942	0.605652	1.24096
28.2136	0.866942	0.605652	1.24096
25.4921	0.935203	0.693668	1.26084
2.17112	1.60143	1.06822	2.4008
28.2136	0.866942	0.605652	1.24096
28.2136	0.866942	0.605652	1.24096
15.0582	1.39428	1.09954	1.76804
28.1287	0.86885	0.608115	1.24138
25.6345	0.931241	0.688614	1.25935
28.1287	0.86885	0.608115	1.24138
28.1287	0.86885	0.608115	1.24138
28.1287	0.86885	0.608115	1.24138
28.1287	0.86885	0.608115	1.24138
17.7933	1.27227	1.01539	1.59412
22.2587	1.0431	0.822152	1.32344
28.0465	0.87071	0.610516	1.2418
28.0465	0.87071	0.610516	1.2418
0.925394	1.7173	1.04481	2.82264
28.0465	0.87071	0.610516	1.2418
27.8795	0.874529	0.61545	1.24267
27.8795	0.874529	0.61545	1.24267
27.8795	0.874529	0.61545	1.24267
27.8795	0.874529	0.61545	1.24267
27.8795	0.874529	0.61545	1.24267
27.8795	0.874529	0.61545	1.24267
1.65914	1.63487	1.06375	2.5126
27.6331	0.880259	0.62286	1.24403
20.3285	1.13268	0.910675	1.40882
27.6331	0.880259	0.62286	1.24403
27.6331	0.880259	0.62286	1.24403
17.4428	1.29098	1.02841	1.6206
27.6331	0.880259	0.62286	1.24403
1.60164	1.63946	1.06335	2.52771
27.6331	0.880259	0.62286	1.24403
27.6331	0.880259	0.62286	1.24403
27.6331	0.880259	0.62286	1.24403
27.6331	0.880259	0.62286	1.24403
7.57563	1.48745	1.18724	1.86356
24.4107	0.966903	0.733436	1.27469
27.5483	0.882259	0.625448	1.24452
27.5483	0.882259	0.625448	1.24452
27.5483	0.882259	0.625448	1.24452
27.5483	0.882259	0.625448	1.24452
27.4661	0.884208	0.62797	1.245
20.2464	1.13693	0.914391	1.41364
21.6756	1.06803	0.848683	1.34406
2.31896	1.59368	1.07016	2.3733
27.4661	0.884208	0.62797	1.245
27.4661	0.884208	0.62797	1.245
27.3812	0.886235	0.630594	1.24551
18.7159	1.2213	0.979913	1.52214
27.3812	0.886235	0.630594	1.24551
27.3812	0.886235	0.630594	1.24551
27.3812	0.886235	0.630594	1.24551
27.3812	0.886235	0.630594	1.24551
27.2991	0.88821	0.633151	1.24602
27.2991	0.88821	0.633151	1.24602
15.6304	1.37339	1.08513	1.73821
27.2991	0.88821	0.633151	1.24602
27.2991	0.88821	0.633151	1.24602
27.2991	0.88821	0.633151	1.24602
27.2142	0.890265	0.635811	1.24655
20.8542	1.1063	0.886615	1.38042
27.2142	0.890265	0.635811	1.24655
27.2142	0.890265	0.635811	1.24655
27.2142	0.890265	0.635811	1.24655
27.2142	0.890265	0.635811	1.24655
27.2142	0.890265	0.635811	1.24655
27.2142	0.890265	0.635811	1.24655
27.2142	0.890265	0.635811	1.24655
27.2142	0.890265	0.635811	1.24655
27.2142	0.890265	0.635811	1.24655
27.2142	0.890265	0.635811	1.24655
20.2163	1.1385	0.91575	1.41544
27.2142	0.890265	0.635811	1.24655
16.0876	1.35502	1.07255	1.71188
27.2142	0.890265	0.635811	1.24655
27.2142	0.890265	0.635811	1.24655
27.2142	0.890265	0.635811	1.24655
18.8227	1.21527	0.975632	1.51378
27.0472	0.89435	0.641099	1.24764
27.0472	0.89435	0.641099	1.24764
27.0472	0.89435	0.641099	1.24764
27.0472	0.89435	0.641099	1.24764
20.9774	1.10033	0.880928	1.37437
26.6338	0.904706	0.654493	1.25057
26.6338	0.904706	0.654493	1.25057
26.3655	0.911616	0.663416	1.25268
26.6338	0.904706	0.654493	1.25057
26.6338	0.904706	0.654493	1.25057
13.8617	1.4308	1.1248	1.82005
39.6331	0.696521	0.5	1.20289
39.6331	0.696521	0.5	1.20289
39.6331	0.696521	0.5	1.20289
39.6331	0.696521	0.5	1.20289
5.77687	1.50439	1.1628	1.94634
20.6735	1.11521	0.89493	1.38971
26.6338	0.904706	0.654493	1.25057
26.6338	0.904706	0.654493	1.25057
26.6338	0.904706	0.654493	1.25057
19.8357	1.15868	0.932723	1.43938
15.102	1.39276	1.09849	1.76587
13.859	1.43087	1.12485	1.82015
26.5489	0.906875	0.657296	1.25122
26.5489	0.906875	0.657296	1.25122
26.5489	0.906875	0.657296	1.25122
26.5489	0.906875	0.657296	1.25122
26.5489	0.906875	0.657296	1.25122
23.3265	1.00232	0.775968	1.2947
26.5489	0.906875	0.657296	1.25122
26.5489	0.906875	0.657296	1.25122
26.5489	0.906875	0.657296	1.25122
19.258	1.19058	0.957659	1.48016
26.5489	0.906875	0.657296	1.25122
19.2279	1.19229	0.958928	1.48243
26.3819	0.911189	0.662864	1.25254
26.3819	0.911189	0.662864	1.25254
14.3381	1.41741	1.11558	1.80092
26.3819	0.911189	0.662864	1.25254
26.3819	0.911189	0.662864	1.25254
15.0637	1.3941	1.09941	1.76777
26.2998	0.913332	0.665628	1.25322
26.2998	0.913332	0.665628	1.25322
17.3908	1.29372	1.03033	1.62446
26.2998	0.913332	0.665628	1.25322
26.2998	0.913332	0.665628	1.25322
26.2998	0.913332	0.665628	1.25322
26.2149	0.915562	0.668501	1.25393
18.6502	1.22499	0.982525	1.52729
26.2149	0.915562	0.668501	1.25393
26.2149	0.915562	0.668501	1.25393
17.9959	1.26126	1.00778	1.5785
26.2149	0.915562	0.668501	1.25393
26.13	0.917808	0.671392	1.25466
26.13	0.917808	0.671392	1.25466
14.5572	1.41075	1.11095	1.79144
26.13	0.917808	0.671392	1.25466
26.13	0.917808	0.671392	1.25466
26.13	0.917808	0.671392	1.25466
39.6331	0.696521	0.5	1.20289
32.2628	0.78921	0.507804	1.22656
39.6331	0.696521	0.5	1.20289
28.0027	0.871707	0.611803	1.24202
39.6331	0.696521	0.5	1.20289
39.6331	0.696521	0.5	1.20289
26.0479	0.919997	0.674206	1.25539
26.0479	0.919997	0.674206	1.25539
23.4579	0.997724	0.770571	1.29184
26.0479	0.919997	0.674206	1.25539
21.4675	1.07737	0.858271	1.35241
19.2498	1.19105	0.958006	1.48078
11.8741	1.47095	1.15269	1.87708
26.0479	0.919997	0.674206	1.25539
18.4203	1.23785	0.991546	1.54535
26.0479	0.919997	0.674206	1.25539
26.0479	0.919997	0.674206	1.25539
22.8364	1.02027	0.796687	1.30659
25.3361	0.939602	0.699259	1.26255
21.692	1.0673	0.847928	1.34342
25.963	0.922274	0.677131	1.25616
25.963	0.922274	0.677131	1.25616
10.4559	1.48325	1.17156	1.87786
16.397	1.34171	1.06344	1.69279
1.19097	1.68003	1.05782	2.66822
25.963	0.922274	0.677131	1.25616
14.6585	1.40756	1.10874	1.78691
25.963	0.922274	0.677131	1.25616
25.963	0.922274	0.677131	1.25616
25.963	0.922274	0.677131	1.25616
17.911	1.26589	1.01098	1.58507
19.154	1.19648	0.96203	1.48807
25.963	0.922274	0.677131	1.25616
19.2498	1.19105	0.958006	1.48078
23.8193	0.985556	0.756103	1.28464
25.963	0.922274	0.677131	1.25616
18.0835	1.25647	1.00447	1.5717
16.1588	1.35202	1.0705	1.70758
25.963	0.922274	0.677131	1.25616
25.963	0.922274	0.677131	1.25616
25.963	0.922274	0.677131	1.25616
25.963	0.922274	0.677131	1.25616
24.2382	0.972233	0.739977	1.27739
21.128	1.09314	0.873967	1.36727
25.8809	0.924492	0.679978	1.25693
25.8809	0.924492	0.679978	1.25693
25.8809	0.924492	0.679978	1.25693
25.8809	0.924492	0.679978	1.25693
25.7112	0.929126	0.685912	1.25858
25.7112	0.929126	0.685912	1.25858
25.7112	0.929126	0.685912	1.25858
25.7112	0.929126	0.685912	1.25858
19.0773	1.20084	0.965224	1.49398
25.7112	0.929126	0.685912	1.25858
25.6318	0.931317	0.688711	1.25938
25.6318	0.931317	0.688711	1.25938
22.6585	1.02711	0.804423	1.31143
25.6318	0.931317	0.688711	1.25938
25.6318	0.931317	0.688711	1.25938
25.6318	0.931317	0.688711	1.25938
25.4648	0.935971	0.694645	1.26114
22.4914	1.03368	0.811775	1.31625
25.4648	0.935971	0.694645	1.26114
20.616	1.11808	0.897567	1.39276
25.4648	0.935971	0.694645	1.26114
25.4648	0.935971	0.694645	1.26114
25.4648	0.935971	0.694645	1.26114
25.4648	0.935971	0.694645	1.26114
25.4648	0.935971	0.694645	1.26114
25.4648	0.935971	0.694645	1.26114
14.924	1.39886	1.10271	1.77455
25.4648	0.935971	0.694645	1.26114
25.3799	0.938361	0.697684	1.26206
23.1157	1.00988	0.784769	1.29957
25.3799	0.938361	0.697684	1.26206
20.6927	1.11426	0.89405	1.3887
25.3799	0.938361	0.697684	1.26206
15.2416	1.38783	1.09508	1.75884
25.3799	0.938361	0.697684	1.26206
25.3799	0.938361	0.697684	1.26206
25.3799	0.938361	0.697684	1.26206
25.3799	0.938361	0.697684	1.26206
25.3799	0.938361	0.697684	1.26206
25.358	0.938981	0.698471	1.26231
40.794	0.685829	0.5	1.19852
28.835	0.853351	0.588165	1.2381
40.794	0.685829	0.5	1.19852
40.794	0.685829	0.5	1.19852
40.794	0.685829	0.5	1.19852
40.794	0.685829	0.5	1.19852
39.5483	0.697327	0.5	1.20321
39.5483	0.697327	0.5	1.20321
39.5483	0.697327	0.5	1.20321
27.0856	0.893408	0.639879	1.24739
39.5483	0.697327	0.5	1.20321
39.258	0.700123	0.5	1.2043
25.128	0.945556	0.706795	1.26497
19.499	1.1771	0.947393	1.46251
25.128	0.945556	0.706795	1.26497
19.1376	1.19741	0.962717	1.48933
19.8631	1.15721	0.931516	1.43758
25.128	0.945556	0.706795	1.26497
25.128	0.945556	0.706795	1.26497
25.128	0.945556	0.706795	1.26497
25.128	0.945556	0.706795	1.26497
25.128	0.945556	0.706795	1.26497
25.128	0.945556	0.706795	1.26497
25.128	0.945556	0.706795	1.26497
25.0459	0.947935	0.709796	1.26597
25.0459	0.947935	0.709796	1.26597
25.0459	0.947935	0.709796	1.26597
25.0459	0.947935	0.709796	1.26597
25.0459	0.947935	0.709796	1.26597
3.11841	1.56098	1.08623	2.24324
16.0356	1.35719	1.07403	1.71499
24.8789	0.952824	0.715938	1.26809
20.0493	1.14727	0.923246	1.42566
17.0185	1.31269	1.04351	1.65129
17.6756	1.2786	1.01978	1.6031
22.3929	1.03764	0.816152	1.31923
24.8789	0.952824	0.715938	1.26809
24.8789	0.952824	0.715938	1.26809
24.8789	0.952824	0.715938	1.26809
13.3114	1.44431	1.1338	1.83985
24.8789	0.952824	0.715938	1.26809
24.8789	0.952824	0.715938	1.26809
21.2457	1.0876	0.868521	1.36194
24.7091	0.957865	0.722236	1.27037
24.7091	0.957865	0.722236	1.27037
24.7091	0.957865	0.722236	1.27037
24.7091	0.957865	0.722236	1.27037
19.165	1.19586	0.961572	1.48723
39.5483	0.697327	0.5	1.20321
39.3593	0.69914	0.5	1.20392
39.5483	0.697327	0.5	1.20321
39.5483	0.697327	0.5	1.20321
39.5483	0.697327	0.5	1.20321
39.5483	0.697327	0.5	1.20321
24.7091	0.957865	0.722236	1.27037
24.7091	0.957865	0.722236	1.27037
24.7091	0.957865	0.722236	1.27037
9.4976	1.48365	1.18183	1.86254
18.5791	1.22898	0.985337	1.53288
24.7091	0.957865	0.722236	1.27037
24.7091	0.957865	0.722236	1.27037
14.2642	1.41959	1.11708	1.80402
24.7091	0.957865	0.722236	1.27037
4.9117	1.51777	1.13935	2.02186
22.1218	1.04878	0.82832	1.32793
1.07871	1.69436	1.054	2.72377
24.7091	0.957865	0.722236	1.27037
24.7091	0.957865	0.722236	1.27037
24.7091	0.957865	0.722236	1.27037
24.7091	0.957865	0.722236	1.27037
24.7091	0.957865	0.722236	1.27037
19.7673	1.16238	0.935734	1.44393
24.2984	0.970363	0.737687	1.27643
24.2984	0.970363	0.737687	1.27643
24.2984	0.970363	0.737687	1.27643
18.204	1.24984	0.999879	1.5623
24.2984	0.970363	0.737687	1.27643
18.6585	1.22453	0.982199	1.52665
24.2136	0.973001	0.740915	1.27779
24.2136	0.973001	0.740915	1.27779
22.4011	1.03731	0.815786	1.31898
24.2136	0.973001	0.740915	1.27779
24.2136	0.973001	0.740915	1.27779
24.2136	0.973001	0.740915	1.27779
24.2136	0.973001	0.740915	1.27779
12.7803	1.45539	1.14078	1.85677
8.25462	1.4852	1.18841	1.85611
24.2136	0.973001	0.740915	1.27779
13.1116	1.44868	1.13655	1.84652
24.2136	0.973001	0.740915	1.27779
12.9172	1.45268	1.13903	1.85269
24.1287	0.975658	0.744153	1.27918
24.1287	0.975658	0.744153	1.27918
24.1287	0.975658	0.744153	1.27918
24.1287	0.975658	0.744153	1.27918
24.1287	0.975658	0.744153	1.27918
24.1287	0.975658	0.744153	1.27918
17.8042	1.27167	1.01498	1.59328
20.0082	1.14945	0.925078	1.42824
18.037	1.25902	1.00623	1.57531
24.1287	0.975658	0.744153	1.27918
24.1287	0.975658	0.744153	1.27918
24.1287	0.975658	0.744153	1.27918
24.1287	0.975658	0.744153	1.27918
18.0342	1.25917	1.00633	1.57553
21.1691	1.0912	0.872067	1.36539
24.1287	0.975658	0.744153	1.27918
24.1287	0.975658	0.744153	1.27918
14.6229	1.40868	1.10952	1.78851
24.1287	0.975658	0.744153	1.27918
12.501	1.46066	1.14439	1.86434
24.1287	0.975658	0.744153	1.27918
24.1287	0.975658	0.744153	1.27918
24.1287	0.975658	0.744153	1.27918
24.0465	0.978248	0.747297	1.28058
24.0465	0.978248	0.747297	1.28058
24.0465	0.978248	0.747297	1.28058
24.0465	0.978248	0.747297	1.28058
18.4066	1.23862	0.992077	1.54642
20.0219	1.14872	0.924468	1.42738
13.7358	1.43408	1.12703	1.82479
24.0465	0.978248	0.747297	1.28058
24.0465	0.978248	0.747297	1.28058
24.0465	0.978248	0.747297	1.28058
24.0465	0.978248	0.747297	1.28058
24.0465	0.978248	0.747297	1.28058
17.2731	1.29985	1.03461	1.6331
23.9617	0.980948	0.75056	1.28205
23.9617	0.980948	0.75056	1.28205
23.9617	0.980948	0.75056	1.28205
15.2717	1.38675	1.09433	1.7573
23.9617	0.980948	0.75056	1.28205
23.9617	0.980948	0.75056	1.28205
22.4613	1.03489	0.813109	1.31715
23.9617	0.980948	0.75056	1.28205
6.41752	1.49631	1.17541	1.90482
18.8364	1.2145	0.97508	1.51271
14.4723	1.41337	1.11277	1.79517
39.4661	0.698113	0.5	1.20352
39.4661	0.698113	0.5	1.20352
39.4661	0.698113	0.5	1.20352
39.4661	0.698113	0.5	1.20352
39.4661	0.698113	0.5	1.20352
26.3765	0.911331	0.663048	1.25259
16.6215	1.33159	1.05651	1.67828
23.9617	0.980948	0.75056	1.28205
23.9617	0.980948	0.75056	1.28205
23.9617	0.980948	0.75056	1.28205
16.1314	1.35318	1.07129	1.70924
23.9617	0.980948	0.75056	1.28205
23.8795	0.983594	0.753747	1.28353
23.8795	0.983594	0.753747	1.28353
15.5619	1.37601	1.08694	1.74195
23.8795	0.983594	0.753747	1.28353
15.2717	1.38675	1.09433	1.7573
18.5873	1.22852	0.985013	1.53223
23.8795	0.983594	0.753747	1.28353
5.66735	1.50591	1.16017	1.9547
23.8795	0.983594	0.753747	1.28353
23.8795	0.983594	0.753747	1.28353
23.8795	0.983594	0.753747	1.28353
23.8795	0.983594	0.753747	1.28353
23.7947	0.986364	0.757072	1.2851
23.7947	0.986364	0.757072	1.2851
23.7947	0.986364	0.757072	1.2851
12.8378	1.45426	1.14004	1.85509
23.7947	0.986364	0.757072	1.2851
23.7947	0.986364	0.757072	1.2851
23.7947	0.986364	0.757072	1.2851
23.7947	0.986364	0.757072	1.2851
23.7947	0.986364	0.757072	1.2851
23.7947	0.986364	0.757072	1.2851
23.7947	0.986364	0.757072	1.2851
7.41684	1.48821	1.18637	1.86685
17.1116	1.30806	1.04031	1.64472
17.3196	1.29745	1.03293	1.6297
23.7947	0.986364	0.757072	1.2851
23.7947	0.986364	0.757072	1.2851
17.8973	1.26663	1.0115	1.58612
23.7947	0.986364	0.757072	1.2851
19.781	1.16164	0.935133	1.44302
23.6331	0.99174	0.763486	1.28823
23.6331	0.99174	0.763486	1.28823
23.6331	0.99174	0.763486	1.28823
23.6331	0.99174	0.763486	1.28823
18.8474	1.21388	0.974638	1.51185
22.0561	1.05155	0.831296	1.33016
23.4661	0.99744	0.770236	1.29167
23.4661	0.99744	0.770236	1.29167
23.4661	0.99744	0.770236	1.29167
22.7351	1.02414	0.801078	1.30931
23.4661	0.99744	0.770236	1.29167
39.4661	0.698113	0.5	1.20352
36.6379	0.72824	0.5	1.21345
39.4661	0.698113	0.5	1.20352
39.4661	0.698113	0.5	1.20352
39.4661	0.698113	0.5	1.20352
39.4661	0.698113	0.5	1.20352
23.2991	1.00329	0.777101	1.29531
23.2991	1.00329	0.777101	1.29531
23.2991	1.00329	0.777101	1.29531
23.2991	1.00329	0.777101	1.29531
23.2991	1.00329	0.777101	1.29531
15.4251	1.38115	1.09047	1.7493
23.2991	1.00329	0.777101	1.29531
1.84257	1.62148	1.06505	2.46862
23.2991	1.00329	0.777101	1.29531
23.2991	1.00329	0.777101	1.29531
3.75359	1.54233	1.10384	2.15499
23.2991	1.00329	0.777101	1.29531
23.2142	1.00632	0.780632	1.29725
23.2142	1.00632	0.780632	1.29725
18.3135	1.24379	0.995676	1.55372
23.2142	1.00632	0.780632	1.29725
23.2142	1.00632	0.780632	1.29725
23.2142	1.00632	0.780632	1.29725
23.1294	1.00938	0.784192	1.29924
23.1294	1.00938	0.784192	1.29924
23.1294	1.00938	0.784192	1.29924
19.2361	1.19182	0.958583	1.48181
23.1294	1.00938	0.784192	1.29924
5.25394	1.51208	1.14927	1.98943
23.0472	1.01239	0.787664	1.30123
23.0472	1.01239	0.787664	1.30123
23.0472	1.01239	0.787664	1.30123
11.8905	1.47071	1.15246	1.87683
23.0472	1.01239	0.787664	1.30123
23.0472	1.01239	0.787664	1.30123
23.0472	1.01239	0.787664	1.30123
23.0472	1.01239	0.787664	1.30123
23.0472	1.01239	0.787664	1.30123
23.0472	1.01239	0.787664	1.30123
23.0472	1.01239	0.787664	1.30123
15.9754	1.35967	1.07573	1.71855
22.9624	1.01553	0.791277	1.30334
22.9624	1.01553	0.791277	1.30334
22.9624	1.01553	0.791277	1.30334
13.1472	1.44792	1.13609	1.84535
10.0726	1.48342	1.17608	1.87108
15.8905	1.36312	1.0781	1.72351
22.9624	1.01553	0.791277	1.30334
17.2156	1.3028	1.03666	1.63726
22.9624	1.01553	0.791277	1.30334
22.9624	1.01553	0.791277	1.30334
22.4175	1.03664	0.815055	1.31847
22.9624	1.01553	0.791277	1.30334
39.4661	0.698113	0.5	1.20352
32.9309	0.77856	0.5	1.22464
1.1718	1.68235	1.05729	2.67695
39.4661	0.698113	0.5	1.20352
39.4661	0.698113	0.5	1.20352
39.4661	0.698113	0.5	1.20352
22.8802	1.01861	0.794799	1.30545
22.8802	1.01861	0.794799	1.30545
22.8802	1.01861	0.794799	1.30545
22.8802	1.01861	0.794799	1.30545
2.92129	1.56789	1.08149	2.27304
22.8802	1.01861	0.794799	1.30545
22.8802	1.01861	0.794799	1.30545
22.8802	1.01861	0.794799	1.30545
22.8802	1.01861	0.794799	1.30545
22.8802	1.01861	0.794799	1.30545
22.8802	1.01861	0.794799	1.30545
13.1636	1.44757	1.13587	1.84481
22.8802	1.01861	0.794799	1.30545
20.9911	1.09967	0.880296	1.37371
22.8802	1.01861	0.794799	1.30545
22.8802	1.01861	0.794799	1.30545
22.8802	1.01861	0.794799	1.30545
22.8802	1.01861	0.794799	1.30545
21.18	1.09068	0.871561	1.36489
8.24914	1.48521	1.18842	1.85613
15.0198	1.3956	1.10045	1.76992
22.7953	1.02183	0.798463	1.30768
22.7953	1.02183	0.798463	1.30768
16.6872	1.32855	1.05443	1.67393
22.7105	1.02509	0.802151	1.30999
22.7105	1.02509	0.802151	1.30999
22.7105	1.02509	0.802151	1.30999
22.7105	1.02509	0.802151	1.30999
21.0212	1.09822	0.878904	1.37227
22.7105	1.02509	0.802151	1.30999
22.5489	1.0314	0.809234	1.31456
12.7721	1.45555	1.14088	1.85701
22.5489	1.0314	0.809234	1.31456
22.5489	1.0314	0.809234	1.31456
15.2608	1.38714	1.09461	1.75786
22.5489	1.0314	0.809234	1.31456
22.4668	1.03467	0.812867	1.31699
22.4668	1.03467	0.812867	1.31699
22.4668	1.03467	0.812867	1.31699
22.0726	1.05086	0.830551	1.3296
22.4668	1.03467	0.812867	1.31699
22.4668	1.03467	0.812867	1.31699
22.4668	1.03467	0.812867	1.31699
0.0465435	2.33823	0.5	16.9911
9.70568	1.48355	1.17991	1.86533
22.4668	1.03467	0.812867	1.31699
1.92197	1.61623	1.06569	2.45117
22.4668	1.03467	0.812867	1.31699
22.3819	1.03808	0.81664	1.31956
22.3819	1.03808	0.81664	1.31956
14.9322	1.39858	1.10252	1.77415
22.3819	1.03808	0.81664	1.31956
22.3819	1.03808	0.81664	1.31956
22.3819	1.03808	0.81664	1.31956
22.3819	1.03808	0.81664	1.31956
22.3819	1.03808	0.81664	1.31956
22.3819	1.03808	0.81664	1.31956
17.2348	1.30182	1.03598	1.63588
22.3819	1.03808	0.81664	1.31956
22.3819	1.03808	0.81664	1.31956
22.3819	1.03808	0.81664	1.31956
22.3819	1.03808	0.81664	1.31956
22.3819	1.03808	0.81664	1.31956
18.3381	1.24242	0.994726	1.55179
11.0883	1.48003	1.1633	1.883
22.3819	1.03808	0.81664	1.31956
22.3819	1.03808	0.81664	1.31956
22.3819	1.03808	0.81664	1.31956
22.3819	1.03808	0.81664	1.31956
19.5838	1.17241	0.943729	1.45651
22.3819	1.03808	0.81664	1.31956
3.91786	1.53822	1.10879	2.13396
22.3819	1.03808	0.81664	1.31956
22.3819	1.03808	0.81664	1.31956
18.423	1.2377	0.991439	1.54513
22.3819	1.03808	0.81664	1.31956
22.3819	1.03808	0.81664	1.31956
15.7098	1.3703	1.08302	1.7338
22.2998	1.04142	0.82031	1.32213
22.2998	1.04142	0.82031	1.32213
19.5017	1.17695	0.947275	1.46231
22.2998	1.04142	0.82031	1.32213
22.2998	1.04142	0.82031	1.32213
22.2998	1.04142	0.82031	1.32213
39.3812	0.698929	0.5	1.20384
39.3812	0.698929	0.5	1.20384
39.3812	0.698929	0.5	1.20384
39.3812	0.698929	0.5	1.20384
21.3361	1.0834	0.864343	1.35798
39.3812	0.698929	0.5	1.20384
22.2149	1.04491	0.824121	1.32485
18.0726	1.25707	1.00488	1.57255
22.2149	1.04491	0.824121	1.32485
22.2149	1.04491	0.824121	1.32485
22.2149	1.04491	0.824121	1.32485
22.2149	1.04491	0.824121	1.32485
22.13	1.04844	0.827949	1.32765
22.13	1.04844	0.827949	1.32765
22.13	1.04844	0.827949	1.32765
21.7029	1.06681	0.847425	1.343
22.13	1.04844	0.827949	1.32765
22.13	1.04844	0.827949	1.32765
22.13	1.04844	0.827949	1.32765
15.666	1.37201	1.08419	1.73624
22.13	1.04844	0.827949	1.32765
22.13	1.04844	0.827949	1.32765
22.13	1.04844	0.827949	1.32765
22.13	1.04844	0.827949	1.32765
22.13	1.04844	0.827949	1.32765
22.13	1.04844	0.827949	1.32765
2.25873	1.59675	1.06932	2.38433
22.13	1.04844	0.827949	1.32765
22.13	1.04844	0.827949	1.32765
8.66804	1.48443	1.18731	1.8559
17.8426	1.2696	1.01355	1.59034
18.8364	1.2145	0.97508	1.51271
21.963	1.05551	0.835526	1.3334
21.963	1.05551	0.835526	1.3334
21.963	1.05551	0.835526	1.3334
21.963	1.05551	0.835526	1.3334
21.963	1.05551	0.835526	1.3334
21.963	1.05551	0.835526	1.3334
10.3573	1.48335	1.17277	1.87618
2.09172	1.60589	1.06731	2.41623
21.963	1.05551	0.835526	1.3334
15.0637	1.3941	1.09941	1.76777
5.2512	1.51212	1.14919	1.98967
21.8809	1.05904	0.839272	1.33635
21.8809	1.05904	0.839272	1.33635
21.8809	1.05904	0.839272	1.33635
21.8809	1.05904	0.839272	1.33635
21.8809	1.05904	0.839272	1.33635
21.8809	1.05904	0.839272	1.33635
21.8809	1.05904	0.839272	1.33635
21.8809	1.05904	0.839272	1.33635
21.8809	1.05904	0.839272	1.33635
21.8809	1.05904	0.839272	1.33635
21.8809	1.05904	0.839272	1.33635
39.2991	0.699724	0.5	1.20414
39.2991	0.699724	0.5	1.20414
31.9288	0.794741	0.514538	1.22754
39.2991	0.699724	0.5	1.20414
39.2991	0.699724	0.5	1.20414
39.2991	0.699724	0.5	1.20414
21.796	1.06272	0.843155	1.33947
21.796	1.06272	0.843155	1.33947
21.796	1.06272	0.843155	1.33947
20.1232	1.14337	0.919936	1.42108
14.7379	1.405	1.10697	1.78329
16.8925	1.31882	1.04775	1.66004
21.796	1.06272	0.843155	1.33947
15.8741	1.36379	1.07855	1.72446
21.796	1.06272	0.843155	1.33947
21.796	1.06272	0.843155	1.33947
21.796	1.06272	0.843155	1.33947
21.796	1.06272	0.843155	1.33947
21.7112	1.06645	0.847048	1.34269
21.7112	1.06645	0.847048	1.34269
21.7112	1.06645	0.847048	1.34269
20.8104	1.10844	0.888634	1.38263
16.4162	1.34086	1.06286	1.69157
21.7112	1.06645	0.847048	1.34269
21.6318	1.06997	0.850698	1.34577
21.6318	1.06997	0.850698	1.34577
21.6318	1.06997	0.850698	1.34577
21.2047	1.08952	0.870421	1.36377
21.6318	1.06997	0.850698	1.34577
21.6318	1.06997	0.850698	1.34577
21.6318	1.06997	0.850698	1.34577
21.6318	1.06997	0.850698	1.34577
10.8337	1.48183	1.1667	1.88208
21.6318	1.06997	0.850698	1.34577
21.6318	1.06997	0.850698	1.34577
15.4798	1.37911	1.08907	1.74639
21.6318	1.06997	0.850698	1.34577
21.6318	1.06997	0.850698	1.34577
21.6318	1.06997	0.850698	1.34577
21.6318	1.06997	0.850698	1.34577
11.5893	1.47479	1.15652	1.88065
21.6318	1.06997	0.850698	1.34577
16.3504	1.34376	1.06485	1.69573
21.5469	1.07378	0.854608	1.34916
21.5469	1.07378	0.854608	1.34916
21.5469	1.07378	0.854608	1.34916
21.5469	1.07378	0.854608	1.34916
21.5469	1.07378	0.854608	1.34916
21.5469	1.07378	0.854608	1.34916
21.5469	1.07378	0.854608	1.34916
5.33607	1.5108	1.15154	1.98213
21.5469	1.07378	0.854608	1.34916
3.00068	1.56503	1.08335	2.26089
21.5469	1.07378	0.854608	1.34916
21.4648	1.0775	0.858397	1.35253
21.4648	1.0775	0.858397	1.35253
21.4648	1.0775	0.858397	1.35253
21.4648	1.0775	0.858397	1.35253
21.4648	1.0775	0.858397	1.35253
21.4648	1.0775	0.858397	1.35253
14.0862	1.42468	1.1206	1.81128
21.4648	1.0775	0.858397	1.35253
21.4648	1.0775	0.858397	1.35253
21.4648	1.0775	0.858397	1.35253
21.4648	1.0775	0.858397	1.35253
21.4648	1.0775	0.858397	1.35253
21.3799	1.08138	0.862318	1.3561
21.3799	1.08138	0.862318	1.3561
19.2498	1.19105	0.958006	1.48078
21.3799	1.08138	0.862318	1.3561
11.5921	1.47476	1.15648	1.88062
21.3799	1.08138	0.862318	1.3561
21.3799	1.08138	0.862318	1.3561
21.3799	1.08138	0.862318	1.3561
15.2854	1.38626	1.09399	1.7566
21.3799	1.08138	0.862318	1.3561
21.3799	1.08138	0.862318	1.3561
21.3799	1.08138	0.862318	1.3561
21.3799	1.08138	0.862318	1.3561
5.48118	1.5086	1.15543	1.96972
21.3799	1.08138	0.862318	1.3561
21.3799	1.08138	0.862318	1.3561
10.2533	1.48337	1.17401	1.87426
0.605065	1.78568	0.991975	3.21444
21.2129	1.08914	0.870041	1.36341
21.2129	1.08914	0.870041	1.36341
21.2129	1.08914	0.870041	1.36341
21.2129	1.08914	0.870041	1.36341
21.2129	1.08914	0.870041	1.36341
21.2129	1.08914	0.870041	1.36341
21.128	1.09314	0.873967	1.36727
21.128	1.09314	0.873967	1.36727
21.128	1.09314	0.873967	1.36727
21.128	1.09314	0.873967	1.36727
21.128	1.09314	0.873967	1.36727
21.128	1.09314	0.873967	1.36727
21.0459	1.09704	0.877765	1.3711
21.0459	1.09704	0.877765	1.3711
21.0459	1.09704	0.877765	1.3711
21.0459	1.09704	0.877765	1.3711
16.4107	1.3411	1.06303	1.69192
15.7344	1.36934	1.08236	1.73241
17.7002	1.27728	1.01887	1.60123
21.0459	1.09704	0.877765	1.3711
21.0459	1.09704	0.877765	1.3711
21.0459	1.09704	0.877765	1.3711
12.1123	1.46731	1.14951	1.87299
21.0459	1.09704	0.877765	1.3711
19.0856	1.20038	0.964884	1.49334
13.7988	1.43245	1.12592	1.82243
21.0459	1.09704	0.877765	1.3711
21.0459	1.09704	0.877765	1.3711
18.9733	1.20675	0.969513	1.50204
21.0459	1.09704	0.877765	1.3711
16.8624	1.32027	1.04874	1.6621
20.961	1.10112	0.881687	1.37516
20.961	1.10112	0.881687	1.37516
20.961	1.10112	0.881687	1.37516
20.961	1.10112	0.881687	1.37516
14.4038	1.41545	1.11421	1.79812
20.961	1.10112	0.881687	1.37516
11.9179	1.47031	1.1521	1.8764
20.961	1.10112	0.881687	1.37516
20.961	1.10112	0.881687	1.37516
20.961	1.10112	0.881687	1.37516
20.961	1.10112	0.881687	1.37516
20.961	1.10112	0.881687	1.37516
20.961	1.10112	0.881687	1.37516
20.961	1.10112	0.881687	1.37516
20.961	1.10112	0.881687	1.37516
20.961	1.10112	0.881687	1.37516
20.961	1.10112	0.881687	1.37516
20.961	1.10112	0.881687	1.37516
20.961	1.10112	0.881687	1.37516
9.15264	1.48388	1.18457	1.85882
20.961	1.10112	0.881687	1.37516
20.961	1.10112	0.881687	1.37516
20.1999	1.13936	0.91649	1.41642
20.8789	1.1051	0.885478	1.37919
20.8789	1.1051	0.885478	1.37919
20.8789	1.1051	0.885478	1.37919
20.8789	1.1051	0.885478	1.37919
20.8789	1.1051	0.885478	1.37919
20.8789	1.1051	0.885478	1.37919
34.256	0.758958	0.5	1.2208
32.0082	0.793413	0.512917	1.2273
39.1294	0.701382	0.5	1.20477
30.1383	0.826933	0.554537	1.23314
38.2094	0.710733	0.5	1.20811
24.0027	0.979637	0.748977	1.28133
16.6845	1.32868	1.05452	1.67411
20.8789	1.1051	0.885478	1.37919
20.8789	1.1051	0.885478	1.37919
20.8789	1.1051	0.885478	1.37919
20.8789	1.1051	0.885478	1.37919
18.3436	1.24212	0.994515	1.55136
20.794	1.10925	0.88939	1.38346
20.794	1.10925	0.88939	1.38346
20.794	1.10925	0.88939	1.38346
15.0253	1.39542	1.10032	1.76965
20.794	1.10925	0.88939	1.38346
20.794	1.10925	0.88939	1.38346
20.794	1.10925	0.88939	1.38346
20.794	1.10925	0.88939	1.38346
20.794	1.10925	0.88939	1.38346
20.794	1.10925	0.88939	1.38346
20.794	1.10925	0.88939	1.38346
20.794	1.10925	0.88939	1.38346
20.7091	1.11344	0.893295	1.38784
20.7091	1.11344	0.893295	1.38784
20.7091	1.11344	0.893295	1.38784
20.7091	1.11344	0.893295	1.38784
20.7091	1.11344	0.893295	1.38784
20.7091	1.11344	0.893295	1.38784
20.6324	1.11726	0.896814	1.39188
2.79535	1.57264	1.0787	2.29276
20.6324	1.11726	0.896814	1.39188
20.6324	1.11726	0.896814	1.39188
20.6324	1.11726	0.896814	1.39188
20.6324	1.11726	0.896814	1.39188
15.2663	1.38695	1.09447	1.75758
20.0356	1.148	0.923857	1.42652
20.5476	1.12152	0.900701	1.39647
20.5476	1.12152	0.900701	1.39647
20.0849	1.14539	0.921654	1.42344
15.7536	1.36859	1.08184	1.73133
20.4654	1.12568	0.904452	1.40101
20.4654	1.12568	0.904452	1.40101
20.4654	1.12568	0.904452	1.40101
20.4654	1.12568	0.904452	1.40101
15.8494	1.36478	1.07923	1.72588
20.4654	1.12568	0.904452	1.40101
20.2984	1.13424	0.912039	1.41057
16.7666	1.32483	1.05188	1.66861
20.2984	1.13424	0.912039	1.41057
20.2984	1.13424	0.912039	1.41057
20.2984	1.13424	0.912039	1.41057
20.2984	1.13424	0.912039	1.41057
39.1294	0.701382	0.5	1.20477
39.1294	0.701382	0.5	1.20477
34.5188	0.755296	0.5	1.22003
39.1294	0.701382	0.5	1.20477
39.1294	0.701382	0.5	1.20477
39.1294	0.701382	0.5	1.20477
20.2984	1.13424	0.912039	1.41057
20.2984	1.13424	0.912039	1.41057
20.2984	1.13424	0.912039	1.41057
20.2984	1.13424	0.912039	1.41057
20.2984	1.13424	0.912039	1.41057
16.6078	1.33222	1.05694	1.67918
20.2136	1.13864	0.915873	1.4156
20.2136	1.13864	0.915873	1.4156
20.2136	1.13864	0.915873	1.4156
10.3436	1.48335	1.17294	1.87592
20.2136	1.13864	0.915873	1.4156
20.2136	1.13864	0.915873	1.4156
20.1287	1.14309	0.919691	1.42074
10.0862	1.48342	1.17592	1.87132
8.26831	1.48517	1.18839	1.85606
20.1287	1.14309	0.919691	1.42074
20.1287	1.14309	0.919691	1.42074
20.1287	1.14309	0.919691	1.42074
20.0465	1.14742	0.923368	1.42583
20.0465	1.14742	0.923368	1.42583
20.0465	1.14742	0.923368	1.42583
20.0465	1.14742	0.923368	1.42583
20.0465	1.14742	0.923368	1.42583
12.668	1.45755	1.14222	1.85994
15.2307	1.38822	1.09535	1.7594
15.989	1.35911	1.07535	1.71775
19.9617	1.15193	0.927149	1.4312
19.9617	1.15193	0.927149	1.4312
19.9617	1.15193	0.927149	1.4312
19.9617	1.15193	0.927149	1.4312
18.883	1.21187	0.973196	1.50908
19.9617	1.15193	0.927149	1.4312
19.9617	1.15193	0.927149	1.4312
19.9617	1.15193	0.927149	1.4312
19.9617	1.15193	0.927149	1.4312
19.9617	1.15193	0.927149	1.4312
19.8795	1.15632	0.93079	1.4365
19.8795	1.15632	0.93079	1.4365
16.7146	1.32727	1.05355	1.6721
16.5476	1.33496	1.05883	1.68312
19.8795	1.15632	0.93079	1.4365
19.8795	1.15632	0.93079	1.4365
19.7098	1.16551	0.938251	1.44782
19.7098	1.16551	0.938251	1.44782
19.7098	1.16551	0.938251	1.44782
19.7098	1.16551	0.938251	1.44782
19.7098	1.16551	0.938251	1.44782
19.7098	1.16551	0.938251	1.44782
39.0472	0.702191	0.5	1.20508
39.0472	0.702191	0.5	1.20508
39.0472	0.702191	0.5	1.20508
27.1622	0.891532	0.63745	1.24689
39.0472	0.702191	0.5	1.20508
39.0472	0.702191	0.5	1.20508
19.6331	1.1697	0.941592	1.45308
11.4278	1.47671	1.15871	1.88198
19.6331	1.1697	0.941592	1.45308
19.6331	1.1697	0.941592	1.45308
19.6331	1.1697	0.941592	1.45308
19.6331	1.1697	0.941592	1.45308
6.17112	1.49927	1.17117	1.91927
19.6331	1.1697	0.941592	1.45308
19.6331	1.1697	0.941592	1.45308
19.6331	1.1697	0.941592	1.45308
10.5079	1.48315	1.17091	1.87865
13.0021	1.45095	1.13795	1.85005
19.5483	1.17437	0.945268	1.45901
18.8309	1.21481	0.975301	1.51314
19.5483	1.17437	0.945268	1.45901
19.5483	1.17437	0.945268	1.45901
7.65503	1.4871	1.18759	1.86215
19.5483	1.17437	0.945268	1.45901
19.4661	1.17893	0.948804	1.46486
19.4661	1.17893	0.948804	1.46486
19.4661	1.17893	0.948804	1.46486
19.4661	1.17893	0.948804	1.46486
13.8891	1.43007	1.1243	1.819
19.4661	1.17893	0.948804	1.46486
19.4661	1.17893	0.948804	1.46486
19.4661	1.17893	0.948804	1.46486
19.4661	1.17893	0.948804	1.46486
19.4661	1.17893	0.948804	1.46486
0.520192	1.81168	0.962647	3.40955
13.8891	1.43007	1.1243	1.819
38.9624	0.703033	0.5	1.20539
38.9624	0.703033	0.5	1.20539
23.9179	0.982355	0.752256	1.28284
37.4264	0.719203	0.5	1.21083
38.9624	0.703033	0.5	1.20539
38.9624	0.703033	0.5	1.20539
19.3812	1.18366	0.952434	1.47102
19.3812	1.18366	0.952434	1.47102
19.3812	1.18366	0.952434	1.47102
19.3812	1.18366	0.952434	1.47102
19.3812	1.18366	0.952434	1.47102
17.0404	1.3116	1.04277	1.64975
19.3812	1.18366	0.952434	1.47102
19.3812	1.18366	0.952434	1.47102
6.08898	1.50029	1.16958	1.92451
18.1054	1.25527	1.00364	1.56999
19.3812	1.18366	0.952434	1.47102
19.3812	1.18366	0.952434	1.47102
19.3812	1.18366	0.952434	1.47102
19.3812	1.18366	0.952434	1.47102
5.08693	1.51478	1.14451	2.00485
12.0767	1.46788	1.14998	1.87366
15.0007	1.39626	1.10091	1.77085
19.3812	1.18366	0.952434	1.47102
6.58727	1.49445	1.17792	1.89604
19.2991	1.18827	0.955923	1.47709
19.2991	1.18827	0.955923	1.47709
6.78166	1.49259	1.18048	1.88723
19.2991	1.18827	0.955923	1.47709
19.2991	1.18827	0.955923	1.47709
16.616	1.33184	1.05669	1.67864
19.1294	1.19788	0.96306	1.48996
14.6694	1.40721	1.10849	1.78641
19.1294	1.19788	0.96306	1.48996
17.4702	1.28954	1.0274	1.61856
16.3313	1.3446	1.06542	1.69693
19.0472	1.20255	0.966471	1.49631
19.0472	1.20255	0.966471	1.49631
19.0472	1.20255	0.966471	1.49631
16.2519	1.34804	1.06778	1.70187
19.0472	1.20255	0.966471	1.49631
16.6571	1.32995	1.05539	1.67593
38.9624	0.703033	0.5	1.20539
38.9624	0.703033	0.5	1.20539
38.9624	0.703033	0.5	1.20539
38.9624	0.703033	0.5	1.20539
38.9624	0.703033	0.5	1.20539
24.7502	0.956638	0.720707	1.2698
19.0472	1.20255	0.966471	1.49631
19.0472	1.20255	0.966471	1.49631
19.0472	1.20255	0.966471	1.49631
19.0472	1.20255	0.966471	1.49631
18.2669	1.24636	0.997467	1.55737
19.0472	1.20255	0.966471	1.49631
19.0472	1.20255	0.966471	1.49631
18.7379	1.22006	0.979039	1.52042
19.0472	1.20255	0.966471	1.49631
19.0472	1.20255	0.966471	1.49631
19.0472	1.20255	0.966471	1.49631
11.3238	1.47783	1.16012	1.88255
3.66872	1.54455	1.10133	2.16614
19.0472	1.20255	0.966471	1.49631
19.0472	1.20255	0.966471	1.49631
19.0472	1.20255	0.966471	1.49631
19.0472	1.20255	0.966471	1.49631
19.0472	1.20255	0.966471	1.49631
18.9624	1.20737	0.969961	1.50289
18.9624	1.20737	0.969961	1.50289
18.9624	1.20737	0.969961	1.50289
18.9624	1.20737	0.969961	1.50289
18.9624	1.20737	0.969961	1.50289
18.9624	1.20737	0.969961	1.50289
18.8802	1.21202	0.973308	1.50929
18.8802	1.21202	0.973308	1.50929
10.0068	1.48344	1.1768	1.86998
18.8802	1.21202	0.973308	1.50929
18.8802	1.21202	0.973308	1.50929
18.8802	1.21202	0.973308	1.50929
3.9206	1.53815	1.10887	2.13361
18.8802	1.21202	0.973308	1.50929
18.8802	1.21202	0.973308	1.50929
6.56537	1.49468	1.17761	1.89712
11.0828	1.48007	1.16337	1.88299
18.8802	1.21202	0.973308	1.50929
18.8802	1.21202	0.973308	1.50929
18.8802	1.21202	0.973308	1.50929
18.8802	1.21202	0.973308	1.50929
18.8802	1.21202	0.973308	1.50929
18.8802	1.21202	0.973308	1.50929
18.8802	1.21202	0.973308	1.50929
18.8802	1.21202	0.973308	1.50929
18.8802	1.21202	0.973308	1.50929
18.8802	1.21202	0.973308	1.50929
18.8802	1.21202	0.973308	1.50929
18.8802	1.21202	0.973308	1.50929
9.27584	1.48379	1.18366	1.86001
38.8802	0.703852	0.5	1.20569
38.8802	0.703852	0.5	1.20569
38.8802	0.703852	0.5	1.20569
38.8802	0.703852	0.5	1.20569
38.8802	0.703852	0.5	1.20569
38.8802	0.703852	0.5	1.20569
18.7105	1.2216	0.980131	1.52257
18.7105	1.2216	0.980131	1.52257
18.7105	1.2216	0.980131	1.52257
18.7105	1.2216	0.980131	1.52257
18.7105	1.2216	0.980131	1.52257
7.11294	1.49002	1.18404	1.87508
18.6338	1.22591	0.983175	1.52858
18.6338	1.22591	0.983175	1.52858
13.4921	1.44011	1.13106	1.8336
18.6338	1.22591	0.983175	1.52858
18.6338	1.22591	0.983175	1.52858
18.6338	1.22591	0.983175	1.52858
18.5489	1.23067	0.986521	1.53524
18.5489	1.23067	0.986521	1.53524
18.5489	1.23067	0.986521	1.53524
16.0958	1.35467	1.07231	1.71139
18.5489	1.23067	0.986521	1.53524
18.5489	1.23067	0.986521	1.53524
18.4668	1.23526	0.989734	1.54169
18.4668	1.23526	0.989734	1.54169
18.4668	1.23526	0.989734	1.54169
18.4668	1.23526	0.989734	1.54169
18.4668	1.23526	0.989734	1.54169
18.4668	1.23526	0.989734	1.54169
6.5462	1.49488	1.17734	1.89807
18.4668	1.23526	0.989734	1.54169
18.4668	1.23526	0.989734	1.54169
18.4668	1.23526	0.989734	1.54169
18.4668	1.23526	0.989734	1.54169
18.4668	1.23526	0.989734	1.54169
38.8802	0.703852	0.5	1.20569
27.8275	0.87573	0.617001	1.24295
38.8802	0.703852	0.5	1.20569
38.8802	0.703852	0.5	1.20569
38.8802	0.703852	0.5	1.20569
38.8802	0.703852	0.5	1.20569
18.4668	1.23526	0.989734	1.54169
18.4668	1.23526	0.989734	1.54169
18.4668	1.23526	0.989734	1.54169
13.0924	1.44908	1.1368	1.84714
18.4668	1.23526	0.989734	1.54169
18.4668	1.23526	0.989734	1.54169
18.3819	1.23999	0.993032	1.54836
15.0363	1.39504	1.10006	1.76911
18.3819	1.23999	0.993032	1.54836
18.3819	1.23999	0.993032	1.54836
18.3819	1.23999	0.993032	1.54836
18.3819	1.23999	0.993032	1.54836
18.3819	1.23999	0.993032	1.54836
18.3819	1.23999	0.993032	1.54836
18.3819	1.23999	0.993032	1.54836
18.3819	1.23999	0.993032	1.54836
18.3819	1.23999	0.993032	1.54836
18.3819	1.23999	0.993032	1.54836
18.3819	1.23999	0.993032	1.54836
18.3819	1.23999	0.993032	1.54836
18.3819	1.23999	0.993032	1.54836
14.5927	1.40963	1.11018	1.78986
18.3819	1.23999	0.993032	1.54836
14.3299	1.41766	1.11574	1.80127
18.2998	1.24455	0.996203	1.5548
5.74401	1.50484	1.16202	1.94881
18.2998	1.24455	0.996203	1.5548
18.2998	1.24455	0.996203	1.5548
18.2998	1.24455	0.996203	1.5548
18.2998	1.24455	0.996203	1.5548
16.4627	1.33879	1.06145	1.6886
18.2998	1.24455	0.996203	1.5548
18.2998	1.24455	0.996203	1.5548
16.104	1.35433	1.07208	1.71089
18.2998	1.24455	0.996203	1.5548
18.2998	1.24455	0.996203	1.5548
18.13	1.25391	1.0027	1.56807
18.13	1.25391	1.0027	1.56807
18.13	1.25391	1.0027	1.56807
18.13	1.25391	1.0027	1.56807
14.8583	1.40105	1.10423	1.77767
18.13	1.25391	1.0027	1.56807
18.13	1.25391	1.0027	1.56807
18.13	1.25391	1.0027	1.56807
18.13	1.25391	1.0027	1.56807
9.08693	1.48394	1.18503	1.85825
18.13	1.25391	1.0027	1.56807
18.13	1.25391	1.0027	1.56807
38.7953	0.704704	0.5	1.206
36.0137	0.735774	0.5	1.21546
38.7953	0.704704	0.5	1.206
30.1656	0.826407	0.553873	1.23304
35.4798	0.742499	0.5	1.21713
38.7953	0.704704	0.5	1.206
17.8809	1.26752	1.01211	1.58739
17.8809	1.26752	1.01211	1.58739
17.8809	1.26752	1.01211	1.58739
17.8809	1.26752	1.01211	1.58739
1.80698	1.62394	1.06479	2.47672
17.8809	1.26752	1.01211	1.58739
17.8809	1.26752	1.01211	1.58739
15.4634	1.37972	1.08949	1.74727
8.64339	1.48446	1.18741	1.85584
17.8809	1.26752	1.01211	1.58739
17.8809	1.26752	1.01211	1.58739
17.8809	1.26752	1.01211	1.58739
17.796	1.27212	1.01529	1.59391
16.9227	1.31737	1.04674	1.65796
17.796	1.27212	1.01529	1.59391
17.796	1.27212	1.01529	1.59391
17.796	1.27212	1.01529	1.59391
17.796	1.27212	1.01529	1.59391
17.796	1.27212	1.01529	1.59391
17.796	1.27212	1.01529	1.59391
16.2957	1.34615	1.06648	1.69915
15.0938	1.39305	1.09869	1.76628
17.1855	1.30433	1.03773	1.63943
17.796	1.27212	1.01529	1.59391
17.796	1.27212	1.01529	1.59391
17.796	1.27212	1.01529	1.59391
15.436	1.38074	1.09019	1.74872
10.2505	1.48337	1.17404	1.87421
17.796	1.27212	1.01529	1.59391
17.796	1.27212	1.01529	1.59391
17.7112	1.27669	1.01846	1.6004
17.7112	1.27669	1.01846	1.6004
17.7112	1.27669	1.01846	1.6004
17.7112	1.27669	1.01846	1.6004
17.7112	1.27669	1.01846	1.6004
17.7112	1.27669	1.01846	1.6004
17.5469	1.28547	1.02456	1.61282
17.5469	1.28547	1.02456	1.61282
17.5469	1.28547	1.02456	1.61282
16.1478	1.35248	1.07081	1.70825
17.5469	1.28547	1.02456	1.61282
6.12183	1.49988	1.17023	1.92239
38.7105	0.705562	0.5	1.20631
37.5852	0.717446	0.5	1.21028
38.7105	0.705562	0.5	1.20631
38.7105	0.705562	0.5	1.20631
38.7105	0.705562	0.5	1.20631
38.7105	0.705562	0.5	1.20631
17.3799	1.2943	1.03073	1.62527
17.3799	1.2943	1.03073	1.62527
3.16769	1.55935	1.08748	2.23598
17.3799	1.2943	1.03073	1.62527
17.3799	1.2943	1.03073	1.62527
17.3799	1.2943	1.03073	1.62527
17.2977	1.29858	1.03372	1.6313
17.2977	1.29858	1.03372	1.6313
17.2977	1.29858	1.03372	1.6313
17.2977	1.29858	1.03372	1.6313
13.9658	1.42801	1.12289	1.81604
17.2977	1.29858	1.03372	1.6313
17.2977	1.29858	1.03372	1.6313
17.2977	1.29858	1.03372	1.6313
17.2977	1.29858	1.03372	1.6313
17.2977	1.29858	1.03372	1.6313
17.2977	1.29858	1.03372	1.6313
17.2977	1.29858	1.03372	1.6313
17.2129	1.30294	1.03676	1.63746
6.07529	1.50046	1.16931	1.92541
17.2129	1.30294	1.03676	1.63746
17.2129	1.30294	1.03676	1.63746
17.2129	1.30294	1.03676	1.63746
17.2129	1.30294	1.03676	1.63746
16.961	1.31551	1.04546	1.6553
6.60917	1.49423	1.17822	1.89498
16.961	1.31551	1.04546	1.6553
16.961	1.31551	1.04546	1.6553
6.80356	1.4924	1.18075	1.88632
14.3546	1.41693	1.11524	1.80022
16.8789	1.31948	1.0482	1.66098
16.8789	1.31948	1.0482	1.66098
16.8789	1.31948	1.0482	1.66098
15.5072	1.37808	1.08836	1.74492
16.8789	1.31948	1.0482	1.66098
16.8789	1.31948	1.0482	1.66098
16.794	1.32354	1.05099	1.66676
[truncated: 2,723 more rows]

## Sheet: 2D
_t	hr	hr_lci	hr_uci
40.4654	0.699731	0.5	1.26822
40.4654	0.699731	0.5	1.26822
5.80972	1.42716	1.03869	1.96091
40.4654	0.699731	0.5	1.26822
40.4654	0.699731	0.5	1.26822
40.4654	0.699731	0.5	1.26822
36.7091	0.73773	0.5	1.26696
36.7091	0.73773	0.5	1.26696
36.7091	0.73773	0.5	1.26696
36.7091	0.73773	0.5	1.26696
36.7091	0.73773	0.5	1.26696
10.3299	1.32093	1.02216	1.70702
36.6324	0.738581	0.5	1.26685
36.6324	0.738581	0.5	1.26685
36.6324	0.738581	0.5	1.26685
36.6324	0.738581	0.5	1.26685
36.6324	0.738581	0.5	1.26685
35.0965	0.756356	0.5	1.26397
36.5476	0.739528	0.5	1.26673
36.5476	0.739528	0.5	1.26673
36.5476	0.739528	0.5	1.26673
36.5476	0.739528	0.5	1.26673
36.5476	0.739528	0.5	1.26673
36.5476	0.739528	0.5	1.26673
36.3806	0.741402	0.5	1.26647
25.4839	0.907305	0.665092	1.23773
36.3806	0.741402	0.5	1.26647
36.3806	0.741402	0.5	1.26647
36.3806	0.741402	0.5	1.26647
36.3806	0.741402	0.5	1.26647
36.3806	0.741402	0.5	1.26647
25.6674	0.90359	0.659984	1.23711
36.3806	0.741402	0.5	1.26647
34.5845	0.762595	0.5	1.26271
24.3532	0.935256	0.701607	1.24672
36.3806	0.741402	0.5	1.26647
36.2984	0.74233	0.5	1.26634
24.0192	0.945481	0.714209	1.25164
4.21629	1.54703	1.05657	2.26516
36.2984	0.74233	0.5	1.26634
35.2334	0.754715	0.5	1.26428
36.2984	0.74233	0.5	1.26634
20.501	1.10556	0.86482	1.41331
36.2984	0.74233	0.5	1.26634
36.2984	0.74233	0.5	1.26634
36.1916	0.743542	0.5	1.26617
36.2984	0.74233	0.5	1.26634
36.2984	0.74233	0.5	1.26634
36.2136	0.743293	0.5	1.2662
22.8145	0.990141	0.764785	1.2819
36.2136	0.743293	0.5	1.2662
36.2136	0.743293	0.5	1.2662
31.2526	0.807495	0.521061	1.25139
36.2136	0.743293	0.5	1.2662
36.2136	0.743293	0.5	1.2662
24.4162	0.933433	0.699319	1.24592
32.3203	0.792248	0.5	1.25552
32.5229	0.78945	0.5	1.25626
24.4162	0.933433	0.699319	1.24592
14.9788	1.31409	1.01809	1.69616
40.3806	0.700519	0.5	1.26825
40.3806	0.700519	0.5	1.26825
40.3806	0.700519	0.5	1.26825
6.83094	1.36185	1.01491	1.82739
40.3806	0.700519	0.5	1.26825
40.3806	0.700519	0.5	1.26825
36.1287	0.74426	0.5	1.26606
36.1287	0.74426	0.5	1.26606
31.3484	0.806091	0.519091	1.25177
36.1287	0.74426	0.5	1.26606
36.1287	0.74426	0.5	1.26606
36.1287	0.74426	0.5	1.26606
36.0465	0.745199	0.5	1.26591
36.0465	0.745199	0.5	1.26591
31.0883	0.809918	0.524471	1.25072
36.0465	0.745199	0.5	1.26591
36.0465	0.745199	0.5	1.26591
36.0465	0.745199	0.5	1.26591
36.0465	0.745199	0.5	1.26591
36.0465	0.745199	0.5	1.26591
36.0465	0.745199	0.5	1.26591
36.0465	0.745199	0.5	1.26591
36.0465	0.745199	0.5	1.26591
29.2594	0.838396	0.565385	1.24324
36.0465	0.745199	0.5	1.26591
36.0465	0.745199	0.5	1.26591
19.8549	1.14092	0.890769	1.46132
36.0465	0.745199	0.5	1.26591
17.1718	1.26309	0.982077	1.62451
36.0465	0.745199	0.5	1.26591
36.0465	0.745199	0.5	1.26591
32.6817	0.787278	0.5	1.25683
36.0465	0.745199	0.5	1.26591
36.0465	0.745199	0.5	1.26591
36.0465	0.745199	0.5	1.26591
29.2594	0.838396	0.565385	1.24324
35.9617	0.746174	0.5	1.26576
20.835	1.08731	0.851198	1.38892
0.249144	2.17819	0.796499	5.9567
35.9617	0.746174	0.5	1.26576
35.9617	0.746174	0.5	1.26576
35.9617	0.746174	0.5	1.26576
35.8795	0.747122	0.5	1.26561
35.8795	0.747122	0.5	1.26561
33.0404	0.782438	0.5	1.25807
35.8795	0.747122	0.5	1.26561
24.2793	0.937439	0.70433	1.2477
35.8795	0.747122	0.5	1.26561
35.8795	0.747122	0.5	1.26561
35.8795	0.747122	0.5	1.26561
35.8795	0.747122	0.5	1.26561
35.8795	0.747122	0.5	1.26561
34.8939	0.758805	0.5	1.26349
35.8795	0.747122	0.5	1.26561
35.7947	0.748105	0.5	1.26545
30.2012	0.823379	0.543635	1.24707
35.7947	0.748105	0.5	1.26545
35.7947	0.748105	0.5	1.26545
35.7947	0.748105	0.5	1.26545
35.7947	0.748105	0.5	1.26545
40.2984	0.701283	0.5	1.26828
32.1971	0.793964	0.502269	1.25506
40.2984	0.701283	0.5	1.26828
29.7522	0.830442	0.553823	1.24522
40.2984	0.701283	0.5	1.26828
40.2984	0.701283	0.5	1.26828
35.7098	0.749092	0.5	1.26528
35.7098	0.749092	0.5	1.26528
35.7098	0.749092	0.5	1.26528
35.7098	0.749092	0.5	1.26528
26.5845	0.885625	0.634538	1.23607
35.7098	0.749092	0.5	1.26528
22.1711	1.01882	0.793473	1.30817
35.5483	0.750984	0.5	1.26496
35.5483	0.750984	0.5	1.26496
35.5483	0.750984	0.5	1.26496
35.5483	0.750984	0.5	1.26496
35.5483	0.750984	0.5	1.26496
35.4661	0.751951	0.5	1.26479
35.4661	0.751951	0.5	1.26479
35.4661	0.751951	0.5	1.26479
35.4661	0.751951	0.5	1.26479
35.4661	0.751951	0.5	1.26479
28.6817	0.848	0.57944	1.24103
35.4661	0.751951	0.5	1.26479
35.4661	0.751951	0.5	1.26479
35.4661	0.751951	0.5	1.26479
10.5352	1.32218	1.02415	1.70694
19.0034	1.1868	0.925094	1.52254
35.4661	0.751951	0.5	1.26479
35.2991	0.753931	0.5	1.26443
25.1198	0.915227	0.675771	1.23953
35.2991	0.753931	0.5	1.26443
28.846	0.845238	0.575389	1.24164
35.2991	0.753931	0.5	1.26443
35.2991	0.753931	0.5	1.26443
35.2991	0.753931	0.5	1.26443
35.2991	0.753931	0.5	1.26443
35.2991	0.753931	0.5	1.26443
31.7399	0.800429	0.511193	1.25332
31.3347	0.806291	0.519372	1.25172
35.2991	0.753931	0.5	1.26443
14.0753	1.32301	1.023	1.711
34.8802	0.758972	0.5	1.26345
34.8802	0.758972	0.5	1.26345
34.8802	0.758972	0.5	1.26345
3.50171	1.61107	1.06677	2.4331
24.7775	0.923591	0.686752	1.24211
34.8802	0.758972	0.5	1.26345
34.8802	0.758972	0.5	1.26345
34.8802	0.758972	0.5	1.26345
34.8802	0.758972	0.5	1.26345
34.8802	0.758972	0.5	1.26345
30.9952	0.811301	0.526423	1.25034
34.7953	0.760006	0.5	1.26324
4.41615	1.53045	1.05443	2.22138
22.2478	1.01524	0.790049	1.30462
6.6694	1.37171	1.01987	1.84494
34.7953	0.760006	0.5	1.26324
34.7953	0.760006	0.5	1.26324
34.7953	0.760006	0.5	1.26324
28.2409	0.855539	0.590518	1.2395
31.2498	0.807535	0.521117	1.25138
34.7953	0.760006	0.5	1.26324
34.7953	0.760006	0.5	1.26324
27.2498	0.873194	0.616457	1.23685
30.2478	0.822657	0.542598	1.24727
34.7105	0.761045	0.5	1.26303
34.7105	0.761045	0.5	1.26303
26.9979	0.877843	0.623249	1.23644
34.7105	0.761045	0.5	1.26303
34.7105	0.761045	0.5	1.26303
34.6338	0.761987	0.5	1.26284
28.7584	0.846708	0.577544	1.24131
34.6338	0.761987	0.5	1.26284
34.6338	0.761987	0.5	1.26284
24.6188	0.927785	0.692153	1.24363
34.6338	0.761987	0.5	1.26284
40.2984	0.701283	0.5	1.26828
40.2984	0.701283	0.5	1.26828
40.2984	0.701283	0.5	1.26828
37.9822	0.724056	0.5	1.26826
40.2984	0.701283	0.5	1.26828
40.2984	0.701283	0.5	1.26828
26.59	0.885521	0.634388	1.23607
34.6338	0.761987	0.5	1.26284
34.6338	0.761987	0.5	1.26284
34.6338	0.761987	0.5	1.26284
34.6338	0.761987	0.5	1.26284
34.6338	0.761987	0.5	1.26284
9.42368	1.31528	1.01094	1.71123
34.6338	0.761987	0.5	1.26284
21.1718	1.06911	0.83715	1.36534
34.6338	0.761987	0.5	1.26284
14.9596	1.31432	1.01819	1.69657
20.3395	1.1144	0.871336	1.42528
34.6338	0.761987	0.5	1.26284
21.9357	1.03009	0.803957	1.31982
34.6338	0.761987	0.5	1.26284
30.7598	0.814829	0.531421	1.24938
34.6338	0.761987	0.5	1.26284
34.6338	0.761987	0.5	1.26284
31.8385	0.799022	0.509243	1.2537
34.5489	0.763035	0.5	1.26262
34.5489	0.763035	0.5	1.26262
34.5489	0.763035	0.5	1.26262
34.5489	0.763035	0.5	1.26262
34.5489	0.763035	0.5	1.26262
19.5072	1.15983	0.904733	1.48685
34.4668	0.764053	0.5	1.2624
34.4668	0.764053	0.5	1.2624
34.4668	0.764053	0.5	1.2624
34.4668	0.764053	0.5	1.2624
34.4668	0.764053	0.5	1.2624
34.3819	0.76511	0.5	1.26217
34.3819	0.76511	0.5	1.26217
28.7036	0.84763	0.578898	1.24111
34.3819	0.76511	0.5	1.26217
34.3819	0.76511	0.5	1.26217
34.3819	0.76511	0.5	1.26217
34.2998	0.766137	0.5	1.26195
34.2998	0.766137	0.5	1.26195
34.2998	0.766137	0.5	1.26195
34.2998	0.766137	0.5	1.26195
34.2998	0.766137	0.5	1.26195
20.3395	1.1144	0.871336	1.42528
22.9624	0.98401	0.75827	1.27695
34.2149	0.767202	0.5	1.26171
34.2149	0.767202	0.5	1.26171
34.2149	0.767202	0.5	1.26171
34.2149	0.767202	0.5	1.26171
34.2149	0.767202	0.5	1.26171
11.2142	1.32562	1.02895	1.70783
34.13	0.768273	0.5	1.26147
34.13	0.768273	0.5	1.26147
20.5804	1.10121	0.861603	1.40746
30.2286	0.822954	0.543024	1.24719
27.9261	0.86104	0.598611	1.23852
8.83504	1.3133	1.00301	1.71959
40.2136	0.702076	0.5	1.26832
29.4127	0.835899	0.561746	1.24385
28.1615	0.856917	0.592545	1.23924
33.399	0.777687	0.5	1.25925
36.1588	0.743916	0.5	1.26611
32.9856	0.783171	0.5	1.25788
34.13	0.768273	0.5	1.26147
34.13	0.768273	0.5	1.26147
34.13	0.768273	0.5	1.26147
34.13	0.768273	0.5	1.26147
34.13	0.768273	0.5	1.26147
34.13	0.768273	0.5	1.26147
34.13	0.768273	0.5	1.26147
26.8364	0.880862	0.627641	1.23624
34.13	0.768273	0.5	1.26147
1.8371	1.80526	1.12617	2.89385
34.13	0.768273	0.5	1.26147
34.13	0.768273	0.5	1.26147
34.13	0.768273	0.5	1.26147
34.13	0.768273	0.5	1.26147
34.13	0.768273	0.5	1.26147
31.7426	0.80039	0.511139	1.25333
21.2977	1.06244	0.831795	1.35703
33.963	0.770392	0.5	1.26099
33.963	0.770392	0.5	1.26099
33.963	0.770392	0.5	1.26099
33.963	0.770392	0.5	1.26099
15.7262	1.30201	1.01068	1.6773
33.963	0.770392	0.5	1.26099
23.0883	0.978929	0.752768	1.27304
1.50034	1.85774	1.14482	3.01462
32.7529	0.78631	0.5	1.25708
33.963	0.770392	0.5	1.26099
33.963	0.770392	0.5	1.26099
33.963	0.770392	0.5	1.26099
23.5811	0.960312	0.731807	1.26017
33.5031	0.776325	0.5	1.25958
33.8809	0.771441	0.5	1.26074
28.8624	0.844963	0.574986	1.2417
25.7632	0.901666	0.657314	1.23686
33.8809	0.771441	0.5	1.26074
28.1697	0.856774	0.592335	1.23927
33.8809	0.771441	0.5	1.26074
29.0185	0.842364	0.571182	1.2423
33.8809	0.771441	0.5	1.26074
9.75496	1.31723	1.01539	1.70878
33.8809	0.771441	0.5	1.26074
33.796	0.77253	0.5	1.26049
18.204	1.22431	0.953222	1.57248
33.796	0.77253	0.5	1.26049
33.796	0.77253	0.5	1.26049
33.796	0.77253	0.5	1.26049
33.796	0.77253	0.5	1.26049
33.7112	0.773624	0.5	1.26023
33.7112	0.773624	0.5	1.26023
33.7112	0.773624	0.5	1.26023
33.7112	0.773624	0.5	1.26023
33.7112	0.773624	0.5	1.26023
33.7112	0.773624	0.5	1.26023
7.41684	1.33334	1.0004	1.77709
40.2136	0.702076	0.5	1.26832
40.2136	0.702076	0.5	1.26832
40.2136	0.702076	0.5	1.26832
40.2136	0.702076	0.5	1.26832
40.2136	0.702076	0.5	1.26832
33.588	0.77522	0.5	1.25985
29.6728	0.831709	0.555659	1.2449
24.7201	0.925086	0.688685	1.24263
33.6318	0.774651	0.5	1.25999
33.6318	0.774651	0.5	1.25999
33.6318	0.774651	0.5	1.25999
33.5469	0.775754	0.5	1.25972
18.9158	1.19129	0.928498	1.52846
33.5469	0.775754	0.5	1.25972
33.5469	0.775754	0.5	1.25972
33.5469	0.775754	0.5	1.25972
33.5469	0.775754	0.5	1.25972
33.128	0.781269	0.5	1.25836
33.128	0.781269	0.5	1.25836
27.8357	0.862636	0.600959	1.23826
33.128	0.781269	0.5	1.25836
26.5818	0.885678	0.634613	1.23607
33.128	0.781269	0.5	1.25836
33.128	0.781269	0.5	1.25836
33.128	0.781269	0.5	1.25836
21.0842	1.0738	0.840842	1.3713
20.1068	1.12715	0.880679	1.4426
15.1403	1.31206	1.01709	1.69258
33.128	0.781269	0.5	1.25836
33.128	0.781269	0.5	1.25836
33.128	0.781269	0.5	1.25836
33.128	0.781269	0.5	1.25836
28.2382	0.855586	0.590588	1.23949
33.128	0.781269	0.5	1.25836
22.3299	1.01145	0.786377	1.30094
33.0459	0.782365	0.5	1.25809
26.5763	0.885782	0.634764	1.23607
33.0459	0.782365	0.5	1.25809
33.0459	0.782365	0.5	1.25809
33.0459	0.782365	0.5	1.25809
33.0459	0.782365	0.5	1.25809
33.0459	0.782365	0.5	1.25809
33.0459	0.782365	0.5	1.25809
33.0459	0.782365	0.5	1.25809
33.0459	0.782365	0.5	1.25809
32.9309	0.783906	0.5	1.2577
33.0459	0.782365	0.5	1.25809
27.6687	0.86561	0.60533	1.2378
32.961	0.783502	0.5	1.2578
32.961	0.783502	0.5	1.2578
2.7269	1.69142	1.0863	2.63362
32.961	0.783502	0.5	1.2578
32.961	0.783502	0.5	1.2578
40.1287	0.702871	0.5	1.26835
40.1287	0.702871	0.5	1.26835
40.1287	0.702871	0.5	1.26835
40.1287	0.702871	0.5	1.26835
40.1287	0.702871	0.5	1.26835
40.1287	0.702871	0.5	1.26835
32.8789	0.784607	0.5	1.25752
32.8789	0.784607	0.5	1.25752
6.32444	1.39334	1.02883	1.88699
32.8789	0.784607	0.5	1.25752
30.5845	0.817484	0.535198	1.24866
32.8789	0.784607	0.5	1.25752
11.8631	1.32758	1.03092	1.7096
32.7091	0.786905	0.5	1.25692
32.7091	0.786905	0.5	1.25692
32.7091	0.786905	0.5	1.25692
20.282	1.11755	0.873648	1.42955
32.7091	0.786905	0.5	1.25692
32.5476	0.789112	0.5	1.25635
32.5476	0.789112	0.5	1.25635
32.5476	0.789112	0.5	1.25635
32.5476	0.789112	0.5	1.25635
24.2546	0.938177	0.705246	1.24804
32.5476	0.789112	0.5	1.25635
32.4654	0.790241	0.5	1.25605
32.4654	0.790241	0.5	1.25605
22.5435	1.00183	0.776834	1.292
32.4654	0.790241	0.5	1.25605
32.4654	0.790241	0.5	1.25605
32.4654	0.790241	0.5	1.25605
31.3676	0.805811	0.518699	1.25185
32.4654	0.790241	0.5	1.25605
32.4654	0.790241	0.5	1.25605
32.4654	0.790241	0.5	1.25605
32.4654	0.790241	0.5	1.25605
22.0014	1.0269	0.801038	1.31645
23.6222	0.958853	0.730111	1.25926
20.5914	1.10061	0.861158	1.40665
32.4654	0.790241	0.5	1.25605
32.4654	0.790241	0.5	1.25605
32.4654	0.790241	0.5	1.25605
32.4654	0.790241	0.5	1.25605
22.6886	0.995502	0.77037	1.28643
32.3806	0.791413	0.5	1.25574
32.3806	0.791413	0.5	1.25574
32.3806	0.791413	0.5	1.25574
32.3806	0.791413	0.5	1.25574
32.3806	0.791413	0.5	1.25574
32.3806	0.791413	0.5	1.25574
0.260096	2.17298	0.813035	5.80767
23.05	0.980461	0.754437	1.2742
32.3806	0.791413	0.5	1.25574
32.3806	0.791413	0.5	1.25574
32.3806	0.791413	0.5	1.25574
40.0465	0.703643	0.5	1.26838
40.0465	0.703643	0.5	1.26838
40.0465	0.703643	0.5	1.26838
40.0465	0.703643	0.5	1.26838
40.0465	0.703643	0.5	1.26838
33.9986	0.769939	0.5	1.26109
22.6557	0.996921	0.771831	1.28765
26.8392	0.88081	0.627566	1.23625
32.2984	0.792552	0.500334	1.25544
0.668036	2.03139	1.11372	3.70519
16.0575	1.29471	1.0055	1.66712
32.2984	0.792552	0.500334	1.25544
32.1287	0.794922	0.503585	1.25481
32.1287	0.794922	0.503585	1.25481
32.1287	0.794922	0.503585	1.25481
0.150582	2.23291	0.609153	8.18497
1.25394	1.90107	1.15591	3.12661
32.1287	0.794922	0.503585	1.25481
32.1287	0.794922	0.503585	1.25481
32.1287	0.794922	0.503585	1.25481
32.1287	0.794922	0.503585	1.25481
32.1287	0.794922	0.503585	1.25481
25.1691	0.914097	0.674265	1.23924
32.1287	0.794922	0.503585	1.25481
31.9617	0.797274	0.506825	1.25417
31.9617	0.797274	0.506825	1.25417
11.7892	1.32743	1.03082	1.70938
31.9617	0.797274	0.506825	1.25417
31.9617	0.797274	0.506825	1.25417
19.5619	1.15686	0.902529	1.48287
31.9617	0.797274	0.506825	1.25417
31.9617	0.797274	0.506825	1.25417
31.9617	0.797274	0.506825	1.25417
31.9617	0.797274	0.506825	1.25417
8.91718	1.3134	1.00406	1.71804
31.9617	0.797274	0.506825	1.25417
31.8795	0.798438	0.508434	1.25386
20.3888	1.1117	0.869352	1.42162
31.8795	0.798438	0.508434	1.25386
27.5921	0.866984	0.60735	1.23761
8.5859	1.31356	1.00015	1.72517
31.8795	0.798438	0.508434	1.25386
31.8795	0.798438	0.508434	1.25386
8.83504	1.3133	1.00301	1.71959
31.8795	0.798438	0.508434	1.25386
31.8795	0.798438	0.508434	1.25386
31.8795	0.798438	0.508434	1.25386
23.3539	0.968644	0.741343	1.26564
31.7947	0.799647	0.510108	1.25353
31.7947	0.799647	0.510108	1.25353
25.4949	0.907082	0.664787	1.23769
31.7947	0.799647	0.510108	1.25353
31.7947	0.799647	0.510108	1.25353
31.7947	0.799647	0.510108	1.25353
40.0465	0.703643	0.5	1.26838
40.0465	0.703643	0.5	1.26838
9.37166	1.31501	1.01022	1.71175
40.0465	0.703643	0.5	1.26838
40.0465	0.703643	0.5	1.26838
25.9192	0.898557	0.652967	1.23652
31.7947	0.799647	0.510108	1.25353
22.2861	1.01346	0.788335	1.30288
25.8617	0.899699	0.654568	1.23663
31.7947	0.799647	0.510108	1.25353
31.7947	0.799647	0.510108	1.25353
31.7947	0.799647	0.510108	1.25353
31.7098	0.800861	0.511792	1.2532
31.7098	0.800861	0.511792	1.2532
31.7098	0.800861	0.511792	1.2532
31.7098	0.800861	0.511792	1.2532
26.319	0.890726	0.641865	1.23607
31.7098	0.800861	0.511792	1.2532
31.6331	0.801962	0.513324	1.2529
31.6331	0.801962	0.513324	1.2529
31.6331	0.801962	0.513324	1.2529
31.6331	0.801962	0.513324	1.2529
31.6331	0.801962	0.513324	1.2529
30.809	0.814087	0.530367	1.24958
31.2142	0.808059	0.521853	1.25123
31.2142	0.808059	0.521853	1.25123
31.2142	0.808059	0.521853	1.25123
31.2142	0.808059	0.521853	1.25123
28.0465	0.858923	0.595497	1.23888
28.1643	0.856869	0.592475	1.23925
31.1294	0.809311	0.523614	1.25089
31.1294	0.809311	0.523614	1.25089
29.8125	0.829485	0.552437	1.24547
30.6064	0.817151	0.534723	1.24875
31.1294	0.809311	0.523614	1.25089
31.1294	0.809311	0.523614	1.25089
31.0472	0.810528	0.52533	1.25056
31.0472	0.810528	0.52533	1.25056
31.0472	0.810528	0.52533	1.25056
31.0472	0.810528	0.52533	1.25056
31.0472	0.810528	0.52533	1.25056
31.0472	0.810528	0.52533	1.25056
31.0472	0.810528	0.52533	1.25056
31.0472	0.810528	0.52533	1.25056
0.928131	1.9674	1.15434	3.35314
21.9877	1.02756	0.801646	1.31715
31.0472	0.810528	0.52533	1.25056
22.8364	0.989221	0.763816	1.28114
30.1164	0.824701	0.545535	1.24672
38.6858	0.716863	0.5	1.26857
40.0465	0.703643	0.5	1.26838
40.0465	0.703643	0.5	1.26838
40.0465	0.703643	0.5	1.26838
40.0465	0.703643	0.5	1.26838
31.0472	0.810528	0.52533	1.25056
31.0472	0.810528	0.52533	1.25056
31.0472	0.810528	0.52533	1.25056
31.0472	0.810528	0.52533	1.25056
31.0472	0.810528	0.52533	1.25056
31.0472	0.810528	0.52533	1.25056
24.4627	0.932106	0.697646	1.24536
30.9624	0.811791	0.527115	1.25021
30.9624	0.811791	0.527115	1.25021
30.089	0.825129	0.546151	1.24661
30.9624	0.811791	0.527115	1.25021
30.9624	0.811791	0.527115	1.25021
30.9624	0.811791	0.527115	1.25021
30.9624	0.811791	0.527115	1.25021
30.9624	0.811791	0.527115	1.25021
30.9624	0.811791	0.527115	1.25021
21.5003	1.05189	0.823072	1.34432
30.9624	0.811791	0.527115	1.25021
29.5633	0.833466	0.558208	1.24445
30.8802	0.813019	0.528852	1.24987
0.0848734	2.28459	0.5	12.1489
30.8802	0.813019	0.528852	1.24987
30.8802	0.813019	0.528852	1.24987
22.8775	0.987508	0.762004	1.27975
30.5489	0.818026	0.535971	1.24851
30.5489	0.818026	0.535971	1.24851
0.791239	1.99952	1.14007	3.50687
30.5489	0.818026	0.535971	1.24851
30.5489	0.818026	0.535971	1.24851
30.5489	0.818026	0.535971	1.24851
15.0746	1.31293	1.01754	1.69407
30.2998	0.821851	0.541443	1.24748
30.2998	0.821851	0.541443	1.24748
30.2998	0.821851	0.541443	1.24748
5.42642	1.45371	1.04401	2.02418
30.2998	0.821851	0.541443	1.24748
30.2149	0.823166	0.543329	1.24713
30.2149	0.823166	0.543329	1.24713
30.2149	0.823166	0.543329	1.24713
30.2149	0.823166	0.543329	1.24713
30.2149	0.823166	0.543329	1.24713
30.2149	0.823166	0.543329	1.24713
30.13	0.824487	0.545228	1.24678
30.13	0.824487	0.545228	1.24678
30.13	0.824487	0.545228	1.24678
28.4873	0.851302	0.584289	1.24034
30.13	0.824487	0.545228	1.24678
21.8371	1.03491	0.808321	1.32503
30.13	0.824487	0.545228	1.24678
23.8275	0.951771	0.721769	1.25506
30.13	0.824487	0.545228	1.24678
30.13	0.824487	0.545228	1.24678
27.2745	0.872742	0.615796	1.2369
30.13	0.824487	0.545228	1.24678
30.13	0.824487	0.545228	1.24678
30.13	0.824487	0.545228	1.24678
30.13	0.824487	0.545228	1.24678
30.13	0.824487	0.545228	1.24678
30.13	0.824487	0.545228	1.24678
20.3368	1.11455	0.871446	1.42548
39.8795	0.70522	0.5	1.26845
22.4942	1.00402	0.779034	1.29399
39.8795	0.70522	0.5	1.26845
38.6694	0.717028	0.5	1.26857
39.8795	0.70522	0.5	1.26845
39.8795	0.70522	0.5	1.26845
30.0479	0.825771	0.547077	1.24644
29.4565	0.835189	0.560713	1.24402
30.0479	0.825771	0.547077	1.24644
30.0479	0.825771	0.547077	1.24644
30.0479	0.825771	0.547077	1.24644
24.8378	0.922052	0.684753	1.24159
29.963	0.827104	0.548999	1.24609
16.8296	1.27391	0.99014	1.63901
29.963	0.827104	0.548999	1.24609
28.167	0.856821	0.592405	1.23926
29.963	0.827104	0.548999	1.24609
8.16701	1.3164	0.996948	1.73821
29.796	0.829745	0.552815	1.2454
29.796	0.829745	0.552815	1.2454
29.796	0.829745	0.552815	1.2454
29.796	0.829745	0.552815	1.2454
29.796	0.829745	0.552815	1.2454
29.796	0.829745	0.552815	1.2454
18.3381	1.21852	0.948914	1.56472
9.41547	1.31523	1.01082	1.71131
29.7112	0.831097	0.554772	1.24506
29.7112	0.831097	0.554772	1.24506
29.7112	0.831097	0.554772	1.24506
19.6386	1.1527	0.899446	1.47727
29.6318	0.832367	0.556613	1.24473
27.2416	0.873344	0.616677	1.23684
16.6352	1.27962	0.99439	1.64667
29.6318	0.832367	0.556613	1.24473
29.6318	0.832367	0.556613	1.24473
29.6318	0.832367	0.556613	1.24473
29.6318	0.832367	0.556613	1.24473
29.6318	0.832367	0.556613	1.24473
28.3778	0.853177	0.587046	1.23996
29.6318	0.832367	0.556613	1.24473
22.9185	0.985808	0.760195	1.27838
29.6318	0.832367	0.556613	1.24473
29.6318	0.832367	0.556613	1.24473
18.3299	1.21888	0.949182	1.56521
29.6318	0.832367	0.556613	1.24473
29.6318	0.832367	0.556613	1.24473
29.6318	0.832367	0.556613	1.24473
29.6318	0.832367	0.556613	1.24473
39.7947	0.706026	0.5	1.26848
39.7947	0.706026	0.5	1.26848
24.2245	0.939085	0.706371	1.24847
39.7947	0.706026	0.5	1.26848
39.7947	0.706026	0.5	1.26848
39.7947	0.706026	0.5	1.26848
29.6318	0.832367	0.556613	1.24473
29.6318	0.832367	0.556613	1.24473
29.6318	0.832367	0.556613	1.24473
29.6318	0.832367	0.556613	1.24473
29.6318	0.832367	0.556613	1.24473
29.6318	0.832367	0.556613	1.24473
29.5469	0.83373	0.558593	1.24439
29.5469	0.83373	0.558593	1.24439
29.5469	0.83373	0.558593	1.24439
29.5469	0.83373	0.558593	1.24439
29.5469	0.83373	0.558593	1.24439
4.08487	1.55822	1.05809	2.29474
29.5469	0.83373	0.558593	1.24439
19.3867	1.16634	0.909594	1.49556
29.5469	0.83373	0.558593	1.24439
29.5469	0.83373	0.558593	1.24439
29.5469	0.83373	0.558593	1.24439
29.5469	0.83373	0.558593	1.24439
29.5469	0.83373	0.558593	1.24439
29.5469	0.83373	0.558593	1.24439
29.5469	0.83373	0.558593	1.24439
29.5469	0.83373	0.558593	1.24439
29.5469	0.83373	0.558593	1.24439
29.5469	0.83373	0.558593	1.24439
29.2977	0.83777	0.564472	1.24339
29.2977	0.83777	0.564472	1.24339
0.703628	2.02185	1.12302	3.64006
23.3374	0.969263	0.742042	1.26606
29.2977	0.83777	0.564472	1.24339
29.2977	0.83777	0.564472	1.24339
29.2977	0.83777	0.564472	1.24339
29.2977	0.83777	0.564472	1.24339
29.2977	0.83777	0.564472	1.24339
29.2977	0.83777	0.564472	1.24339
29.2977	0.83777	0.564472	1.24339
29.2977	0.83777	0.564472	1.24339
29.2129	0.839159	0.566498	1.24305
29.2129	0.839159	0.566498	1.24305
29.2129	0.839159	0.566498	1.24305
29.2129	0.839159	0.566498	1.24305
29.2129	0.839159	0.566498	1.24305
29.2129	0.839159	0.566498	1.24305
29.128	0.840554	0.568536	1.24272
29.128	0.840554	0.568536	1.24272
29.128	0.840554	0.568536	1.24272
14.1437	1.32247	1.02263	1.71023
29.128	0.840554	0.568536	1.24272
29.128	0.840554	0.568536	1.24272
16.7036	1.27765	0.992921	1.64402
29.128	0.840554	0.568536	1.24272
16.9363	1.27064	0.987703	1.63462
28.2656	0.855112	0.589891	1.23958
28.5038	0.851021	0.583877	1.24039
16.5175	1.28293	0.996844	1.65112
29.0459	0.841911	0.570519	1.2424
18.9952	1.18722	0.925417	1.5231
29.0459	0.841911	0.570519	1.2424
0.11499	2.25827	0.519093	9.82445
29.0459	0.841911	0.570519	1.2424
29.0459	0.841911	0.570519	1.2424
39.7947	0.706026	0.5	1.26848
39.7947	0.706026	0.5	1.26848
39.7947	0.706026	0.5	1.26848
27.7563	0.864046	0.603033	1.23804
39.7947	0.706026	0.5	1.26848
39.7947	0.706026	0.5	1.26848
29.0459	0.841911	0.570519	1.2424
23.3347	0.969366	0.742158	1.26613
29.0459	0.841911	0.570519	1.2424
16.4682	1.28428	0.997843	1.65294
29.0459	0.841911	0.570519	1.2424
29.0459	0.841911	0.570519	1.2424
28.961	0.843319	0.572579	1.24208
28.961	0.843319	0.572579	1.24208
28.961	0.843319	0.572579	1.24208
28.961	0.843319	0.572579	1.24208
28.961	0.843319	0.572579	1.24208
16.1725	1.29194	1.00348	1.66332
28.961	0.843319	0.572579	1.24208
28.961	0.843319	0.572579	1.24208
28.961	0.843319	0.572579	1.24208
23.9233	0.948587	0.71796	1.2533
28.961	0.843319	0.572579	1.24208
28.961	0.843319	0.572579	1.24208
24.3778	0.934539	0.700709	1.2464
28.961	0.843319	0.572579	1.24208
28.961	0.843319	0.572579	1.24208
0.435318	2.10269	1.00083	4.41768
28.961	0.843319	0.572579	1.24208
23.0253	0.981453	0.755513	1.27496
28.8789	0.844688	0.574584	1.24176
28.8789	0.844688	0.574584	1.24176
28.8789	0.844688	0.574584	1.24176
28.8789	0.844688	0.574584	1.24176
28.8789	0.844688	0.574584	1.24176
15.7728	1.30105	1.01001	1.67594
28.8789	0.844688	0.574584	1.24176
28.8789	0.844688	0.574584	1.24176
28.8789	0.844688	0.574584	1.24176
28.8789	0.844688	0.574584	1.24176
18.7789	1.19811	0.93364	1.53749
28.8789	0.844688	0.574584	1.24176
14.8337	1.31577	1.01888	1.69916
28.794	0.84611	0.576667	1.24145
28.794	0.84611	0.576667	1.24145
28.794	0.84611	0.576667	1.24145
28.794	0.84611	0.576667	1.24145
28.794	0.84611	0.576667	1.24145
39.7098	0.706834	0.5	1.26851
39.7098	0.706834	0.5	1.26851
39.7098	0.706834	0.5	1.26851
39.7098	0.706834	0.5	1.26851
39.7098	0.706834	0.5	1.26851
32.7502	0.786347	0.5	1.25707
28.6324	0.848834	0.580664	1.24085
28.6324	0.848834	0.580664	1.24085
28.6324	0.848834	0.580664	1.24085
28.6324	0.848834	0.580664	1.24085
20.5448	1.10316	0.863046	1.41008
28.6324	0.848834	0.580664	1.24085
28.5476	0.850275	0.58278	1.24055
28.5476	0.850275	0.58278	1.24055
28.5476	0.850275	0.58278	1.24055
28.5476	0.850275	0.58278	1.24055
28.5476	0.850275	0.58278	1.24055
28.5476	0.850275	0.58278	1.24055
28.5476	0.850275	0.58278	1.24055
28.5476	0.850275	0.58278	1.24055
19.0664	1.18351	0.922589	1.51821
28.5476	0.850275	0.58278	1.24055
28.5476	0.850275	0.58278	1.24055
18.1574	1.22627	0.954683	1.57512
23.551	0.961391	0.733057	1.26085
22.6612	0.996684	0.771588	1.28745
28.4654	0.851676	0.584839	1.24026
15.3402	1.30908	1.01537	1.68777
28.4654	0.851676	0.584839	1.24026
28.4654	0.851676	0.584839	1.24026
28.4654	0.851676	0.584839	1.24026
28.4654	0.851676	0.584839	1.24026
28.4654	0.851676	0.584839	1.24026
21.0869	1.07365	0.840727	1.37111
28.4654	0.851676	0.584839	1.24026
28.4654	0.851676	0.584839	1.24026
28.4654	0.851676	0.584839	1.24026
28.4654	0.851676	0.584839	1.24026
28.4654	0.851676	0.584839	1.24026
28.4654	0.851676	0.584839	1.24026
28.4654	0.851676	0.584839	1.24026
28.4654	0.851676	0.584839	1.24026
28.3806	0.85313	0.586977	1.23997
28.3806	0.85313	0.586977	1.23997
28.3806	0.85313	0.586977	1.23997
28.3806	0.85313	0.586977	1.23997
28.3806	0.85313	0.586977	1.23997
28.3806	0.85313	0.586977	1.23997
28.2984	0.854545	0.589056	1.23969
28.2984	0.854545	0.589056	1.23969
28.2984	0.854545	0.589056	1.23969
28.2984	0.854545	0.589056	1.23969
22.2615	1.0146	0.789437	1.30399
28.2984	0.854545	0.589056	1.23969
28.2136	0.856013	0.591216	1.23941
28.2136	0.856013	0.591216	1.23941
28.2136	0.856013	0.591216	1.23941
28.2136	0.856013	0.591216	1.23941
28.2136	0.856013	0.591216	1.23941
22.3381	1.01107	0.78601	1.30058
28.2136	0.856013	0.591216	1.23941
28.2136	0.856013	0.591216	1.23941
21.6838	1.04255	0.815071	1.33353
28.2136	0.856013	0.591216	1.23941
24.5777	0.928903	0.693581	1.24407
28.2136	0.856013	0.591216	1.23941
28.2136	0.856013	0.591216	1.23941
25.4921	0.907138	0.664863	1.2377
2.17112	1.75901	1.10884	2.79039
28.2136	0.856013	0.591216	1.23941
28.2136	0.856013	0.591216	1.23941
15.0582	1.31314	1.01764	1.69444
28.1287	0.857489	0.593387	1.23914
25.6345	0.904253	0.660899	1.23721
28.1287	0.857489	0.593387	1.23914
28.1287	0.857489	0.593387	1.23914
28.1287	0.857489	0.593387	1.23914
28.1287	0.857489	0.593387	1.23914
17.7933	1.2409	0.965561	1.59476
22.2587	1.01473	0.789559	1.30412
28.0465	0.858923	0.595497	1.23888
28.0465	0.858923	0.595497	1.23888
0.925394	1.96802	1.15417	3.35574
28.0465	0.858923	0.595497	1.23888
27.8795	0.861861	0.599819	1.23838
27.8795	0.861861	0.599819	1.23838
27.8795	0.861861	0.599819	1.23838
27.8795	0.861861	0.599819	1.23838
27.8795	0.861861	0.599819	1.23838
27.8795	0.861861	0.599819	1.23838
1.65914	1.83215	1.13611	2.95463
27.6331	0.866247	0.606267	1.23771
20.3285	1.115	0.871777	1.42609
27.6331	0.866247	0.606267	1.23771
27.6331	0.866247	0.606267	1.23771
17.4428	1.25383	0.975176	1.6121
27.6331	0.866247	0.606267	1.23771
1.60164	1.84123	1.13931	2.97558
27.6331	0.866247	0.606267	1.23771
27.6331	0.866247	0.606267	1.23771
27.6331	0.866247	0.606267	1.23771
27.6331	0.866247	0.606267	1.23771
7.57563	1.32814	0.998381	1.76683
24.4107	0.93359	0.699517	1.24599
27.5483	0.867772	0.608507	1.2375
27.5483	0.867772	0.608507	1.2375
27.5483	0.867772	0.608507	1.2375
27.5483	0.867772	0.608507	1.2375
27.4661	0.869255	0.610684	1.23731
20.2464	1.1195	0.875078	1.4322
21.6756	1.04297	0.815432	1.334
2.31896	1.74001	1.10204	2.74729
27.4661	0.869255	0.610684	1.23731
27.4661	0.869255	0.610684	1.23731
27.3812	0.870795	0.612942	1.23712
18.7159	1.20116	0.935937	1.54155
27.3812	0.870795	0.612942	1.23712
27.3812	0.870795	0.612942	1.23712
27.3812	0.870795	0.612942	1.23712
27.3812	0.870795	0.612942	1.23712
27.2991	0.872292	0.615136	1.23695
27.2991	0.872292	0.615136	1.23695
15.6304	1.30391	1.01199	1.68004
27.2991	0.872292	0.615136	1.23695
27.2991	0.872292	0.615136	1.23695
27.2991	0.872292	0.615136	1.23695
27.2142	0.873847	0.617412	1.23679
20.8542	1.08627	0.850408	1.38754
27.2142	0.873847	0.617412	1.23679
27.2142	0.873847	0.617412	1.23679
27.2142	0.873847	0.617412	1.23679
27.2142	0.873847	0.617412	1.23679
27.2142	0.873847	0.617412	1.23679
27.2142	0.873847	0.617412	1.23679
27.2142	0.873847	0.617412	1.23679
27.2142	0.873847	0.617412	1.23679
27.2142	0.873847	0.617412	1.23679
27.2142	0.873847	0.617412	1.23679
20.2163	1.12115	0.876287	1.43444
27.2142	0.873847	0.617412	1.23679
16.0876	1.294	1.00498	1.66614
27.2142	0.873847	0.617412	1.23679
27.2142	0.873847	0.617412	1.23679
27.2142	0.873847	0.617412	1.23679
18.8227	1.19595	0.932017	1.53463
27.0472	0.876928	0.621914	1.23651
27.0472	0.876928	0.621914	1.23651
27.0472	0.876928	0.621914	1.23651
27.0472	0.876928	0.621914	1.23651
20.9774	1.07957	0.845306	1.37875
26.6338	0.884688	0.633184	1.23609
26.6338	0.884688	0.633184	1.23609
26.3655	0.889826	0.640578	1.23606
26.6338	0.884688	0.633184	1.23609
26.6338	0.884688	0.633184	1.23609
13.8617	1.32452	1.02417	1.71295
39.6331	0.707568	0.5	1.26854
39.6331	0.707568	0.5	1.26854
39.6331	0.707568	0.5	1.26854
39.6331	0.707568	0.5	1.26854
5.77687	1.42939	1.03921	1.96607
20.6735	1.09612	0.857816	1.40064
26.6338	0.884688	0.633184	1.23609
26.6338	0.884688	0.633184	1.23609
26.6338	0.884688	0.633184	1.23609
19.8357	1.14197	0.891537	1.46274
15.102	1.31258	1.01736	1.69345
13.859	1.32454	1.02418	1.71297
26.5489	0.886304	0.635517	1.23606
26.5489	0.886304	0.635517	1.23606
26.5489	0.886304	0.635517	1.23606
26.5489	0.886304	0.635517	1.23606
26.5489	0.886304	0.635517	1.23606
23.3265	0.969677	0.742508	1.26635
26.5489	0.886304	0.635517	1.23606
26.5489	0.886304	0.635517	1.23606
26.5489	0.886304	0.635517	1.23606
19.258	1.17327	0.914804	1.50475
26.5489	0.886304	0.635517	1.23606
19.2279	1.17488	0.916026	1.50689
26.3819	0.889509	0.640123	1.23605
26.3819	0.889509	0.640123	1.23605
14.3381	1.32081	1.02157	1.7077
26.3819	0.889509	0.640123	1.23605
26.3819	0.889509	0.640123	1.23605
26.3819	0.889509	0.640123	1.23605
26.2998	0.891097	0.642396	1.23608
26.2998	0.891097	0.642396	1.23608
17.3908	1.25565	0.976536	1.61455
26.2998	0.891097	0.642396	1.23608
26.2998	0.891097	0.642396	1.23608
26.2998	0.891097	0.642396	1.23608
26.2149	0.892746	0.644748	1.23614
26.2149	0.892746	0.644748	1.23614
26.2149	0.892746	0.644748	1.23614
26.2149	0.892746	0.644748	1.23614
17.9959	1.23292	0.959627	1.58404
26.2149	0.892746	0.644748	1.23614
26.13	0.894403	0.647103	1.23621
26.13	0.894403	0.647103	1.23621
14.5572	1.31871	1.02038	1.70427
26.13	0.894403	0.647103	1.23621
26.13	0.894403	0.647103	1.23621
26.13	0.894403	0.647103	1.23621
39.6331	0.707568	0.5	1.26854
32.2628	0.793047	0.501012	1.25531
39.6331	0.707568	0.5	1.26854
28.0027	0.859691	0.596627	1.23875
39.6331	0.707568	0.5	1.26854
39.6331	0.707568	0.5	1.26854
26.0479	0.896015	0.649386	1.23631
26.0479	0.896015	0.649386	1.23631
23.4579	0.964775	0.736947	1.26304
26.0479	0.896015	0.649386	1.23631
21.4675	1.05359	0.824495	1.34633
19.2498	1.17371	0.915137	1.50533
11.8741	1.3276	1.03093	1.70964
26.0479	0.896015	0.649386	1.23631
18.4203	1.21488	0.946203	1.55986
26.0479	0.896015	0.649386	1.23631
26.0479	0.896015	0.649386	1.23631
22.8364	0.989221	0.763816	1.28114
25.3361	0.910404	0.669303	1.23836
21.692	1.04214	0.814711	1.33306
25.963	0.89769	0.651747	1.23644
25.963	0.89769	0.651747	1.23644
10.4559	1.3217	1.02341	1.70694
16.397	1.28619	0.999258	1.65552
1.19097	1.91299	1.15768	3.16108
25.963	0.89769	0.651747	1.23644
14.6585	1.31767	1.01983	1.7025
25.963	0.89769	0.651747	1.23644
25.963	0.89769	0.651747	1.23644
25.963	0.89769	0.651747	1.23644
17.911	1.23631	0.962148	1.58859
19.154	1.17884	0.919032	1.5121
25.963	0.89769	0.651747	1.23644
19.2498	1.17371	0.915137	1.50533
23.8193	0.952047	0.722098	1.25522
25.963	0.89769	0.651747	1.23644
18.0835	1.22934	0.95697	1.57924
16.1588	1.29228	1.00373	1.66378
25.963	0.89769	0.651747	1.23644
25.963	0.89769	0.651747	1.23644
25.963	0.89769	0.651747	1.23644
25.963	0.89769	0.651747	1.23644
24.2382	0.938672	0.705859	1.24827
21.128	1.07145	0.838999	1.3683
25.8809	0.899318	0.654034	1.23659
25.8809	0.899318	0.654034	1.23659
25.8809	0.899318	0.654034	1.23659
25.8809	0.899318	0.654034	1.23659
25.7112	0.902709	0.658763	1.23699
25.7112	0.902709	0.658763	1.23699
25.7112	0.902709	0.658763	1.23699
25.7112	0.902709	0.658763	1.23699
19.0773	1.18293	0.922148	1.51745
25.7112	0.902709	0.658763	1.23699
25.6318	0.904308	0.660975	1.23722
25.6318	0.904308	0.660975	1.23722
22.6585	0.996802	0.771709	1.28755
25.6318	0.904308	0.660975	1.23722
25.6318	0.904308	0.660975	1.23722
25.6318	0.904308	0.660975	1.23722
25.4648	0.907698	0.665629	1.2378
22.4914	1.00414	0.779157	1.2941
25.4648	0.907698	0.665629	1.2378
20.616	1.09927	0.860157	1.40484
25.4648	0.907698	0.665629	1.2378
25.4648	0.907698	0.665629	1.2378
25.4648	0.907698	0.665629	1.2378
25.4648	0.907698	0.665629	1.2378
25.4648	0.907698	0.665629	1.2378
25.4648	0.907698	0.665629	1.2378
14.9295	1.31467	1.01835	1.69721
25.4648	0.907698	0.665629	1.2378
25.3799	0.909469	0.668038	1.23815
23.1157	0.977841	0.751578	1.27222
25.3799	0.909469	0.668038	1.23815
20.6927	1.09508	0.857034	1.39924
25.3799	0.909469	0.668038	1.23815
15.2416	1.31062	1.01629	1.69019
25.3799	0.909469	0.668038	1.23815
25.3799	0.909469	0.668038	1.23815
25.3799	0.909469	0.668038	1.23815
25.3799	0.909469	0.668038	1.23815
25.3799	0.909469	0.668038	1.23815
25.358	0.909935	0.668669	1.23825
40.794	0.696706	0.5	1.2681
28.835	0.845421	0.575658	1.2416
40.794	0.696706	0.5	1.2681
40.794	0.696706	0.5	1.2681
40.794	0.696706	0.5	1.2681
40.794	0.696706	0.5	1.2681
39.5483	0.708383	0.5	1.26856
39.5483	0.708383	0.5	1.26856
39.5483	0.708383	0.5	1.26856
27.0856	0.876218	0.620878	1.23657
39.5483	0.708383	0.5	1.26856
39.258	0.711196	0.5	1.26861
25.128	0.915038	0.675519	1.23948
19.499	1.16027	0.905064	1.48745
25.128	0.915038	0.675519	1.23948
19.1376	1.17972	0.919701	1.51325
19.8631	1.14047	0.89044	1.46071
25.128	0.915038	0.675519	1.23948
25.128	0.915038	0.675519	1.23948
25.128	0.915038	0.675519	1.23948
25.128	0.915038	0.675519	1.23948
25.128	0.915038	0.675519	1.23948
25.128	0.915038	0.675519	1.23948
25.128	0.915038	0.675519	1.23948
25.0459	0.916957	0.678066	1.24001
25.0459	0.916957	0.678066	1.24001
25.0459	0.916957	0.678066	1.24001
25.0459	0.916957	0.678066	1.24001
25.0459	0.916957	0.678066	1.24001
3.11841	1.64914	1.07498	2.52998
16.0356	1.29523	1.00587	1.66783
24.8789	0.92102	0.683407	1.24125
20.0493	1.1303	0.882983	1.44688
17.8727	1.23782	0.96327	1.59062
17.6756	1.24536	0.968881	1.60075
24.46	0.932183	0.697744	1.24539
24.8789	0.92102	0.683407	1.24125
24.8789	0.92102	0.683407	1.24125
24.8789	0.92102	0.683407	1.24125
13.3114	1.32707	1.02723	1.71443
24.8789	0.92102	0.683407	1.24125
24.8789	0.92102	0.683407	1.24125
21.2457	1.06518	0.834013	1.36043
24.7091	0.925374	0.689056	1.24274
24.7091	0.925374	0.689056	1.24274
24.7091	0.925374	0.689056	1.24274
24.7091	0.925374	0.689056	1.24274
19.165	1.17826	0.918586	1.51133
39.5483	0.708383	0.5	1.26856
39.5483	0.708383	0.5	1.26856
39.5483	0.708383	0.5	1.26856
39.5483	0.708383	0.5	1.26856
39.5483	0.708383	0.5	1.26856
39.5483	0.708383	0.5	1.26856
24.7091	0.925374	0.689056	1.24274
24.7091	0.925374	0.689056	1.24274
24.7091	0.925374	0.689056	1.24274
9.4976	1.31568	1.01195	1.71057
18.5791	1.20764	0.940793	1.55018
24.7091	0.925374	0.689056	1.24274
24.7091	0.925374	0.689056	1.24274
14.2642	1.32146	1.02197	1.70872
24.7091	0.925374	0.689056	1.24274
4.9117	1.49146	1.04955	2.11942
22.1218	1.02115	0.795672	1.31051
1.07871	1.93523	1.15888	3.23166
24.7091	0.925374	0.689056	1.24274
24.7091	0.925374	0.689056	1.24274
24.7091	0.925374	0.689056	1.24274
24.7091	0.925374	0.689056	1.24274
24.7091	0.925374	0.689056	1.24274
19.7673	1.1457	0.894281	1.4678
24.2984	0.936869	0.70362	1.24744
24.2984	0.936869	0.70362	1.24744
24.2984	0.936869	0.70362	1.24744
18.204	1.22431	0.953222	1.57248
24.2984	0.936869	0.70362	1.24744
18.6585	1.20391	0.937999	1.5452
24.2136	0.939418	0.706782	1.24862
24.2136	0.939418	0.706782	1.24862
22.4011	1.00821	0.783194	1.29786
24.2136	0.939418	0.706782	1.24862
24.2136	0.939418	0.706782	1.24862
24.2136	0.939418	0.706782	1.24862
24.2136	0.939418	0.706782	1.24862
12.7803	1.32799	1.02975	1.71262
8.25462	1.3155	0.997396	1.73506
24.2136	0.939418	0.706782	1.24862
13.1116	1.32751	1.02832	1.71376
24.2136	0.939418	0.706782	1.24862
12.9172	1.32783	1.02922	1.71308
24.1287	0.942026	0.709994	1.24989
24.1287	0.942026	0.709994	1.24989
24.1287	0.942026	0.709994	1.24989
24.1287	0.942026	0.709994	1.24989
24.1287	0.942026	0.709994	1.24989
24.1287	0.942026	0.709994	1.24989
22.6968	0.995148	0.770005	1.28612
20.0082	1.13254	0.884628	1.44994
18.037	1.23125	0.958388	1.5818
24.1287	0.942026	0.709994	1.24989
24.1287	0.942026	0.709994	1.24989
24.1287	0.942026	0.709994	1.24989
24.1287	0.942026	0.709994	1.24989
18.0342	1.23136	0.958471	1.58195
21.1691	1.06926	0.837265	1.36553
24.1287	0.942026	0.709994	1.24989
24.1287	0.942026	0.709994	1.24989
14.6229	1.31804	1.02002	1.70314
24.1287	0.942026	0.709994	1.24989
12.501	1.32815	1.03056	1.71167
24.1287	0.942026	0.709994	1.24989
24.1287	0.942026	0.709994	1.24989
24.1287	0.942026	0.709994	1.24989
24.0465	0.944608	0.713148	1.25119
24.0465	0.944608	0.713148	1.25119
24.0465	0.944608	0.713148	1.25119
24.0465	0.944608	0.713148	1.25119
18.4066	1.21549	0.946659	1.56067
24.0465	0.944608	0.713148	1.25119
13.7358	1.32528	1.02486	1.71376
24.0465	0.944608	0.713148	1.25119
24.0465	0.944608	0.713148	1.25119
24.0465	0.944608	0.713148	1.25119
24.0465	0.944608	0.713148	1.25119
24.0465	0.944608	0.713148	1.25119
17.2731	1.2597	0.979551	1.61997
23.9617	0.947336	0.716453	1.25262
23.9617	0.947336	0.716453	1.25262
23.9617	0.947336	0.716453	1.25262
15.2717	1.31016	1.01602	1.68946
23.9617	0.947336	0.716453	1.25262
23.9617	0.947336	0.716453	1.25262
22.4613	1.00549	0.780502	1.29534
23.9617	0.947336	0.716453	1.25262
6.41752	1.38742	1.02662	1.87504
18.8364	1.19527	0.931506	1.53373
14.4723	1.31955	1.02084	1.70567
39.4661	0.709175	0.5	1.26858
39.4661	0.709175	0.5	1.26858
39.4661	0.709175	0.5	1.26858
39.4661	0.709175	0.5	1.26858
39.4661	0.709175	0.5	1.26858
26.3765	0.889615	0.640275	1.23605
16.6215	1.28001	0.99468	1.6472
23.9617	0.947336	0.716453	1.25262
23.9617	0.947336	0.716453	1.25262
23.9617	0.947336	0.716453	1.25262
23.9617	0.947336	0.716453	1.25262
23.9617	0.947336	0.716453	1.25262
23.8795	0.950033	0.719695	1.25409
23.8795	0.950033	0.719695	1.25409
15.5619	1.30522	1.01287	1.68194
23.8795	0.950033	0.719695	1.25409
16.5613	1.28171	0.995942	1.64948
18.5873	1.20726	0.940506	1.54967
23.8795	0.950033	0.719695	1.25409
5.66735	1.43688	1.04083	1.98362
23.8795	0.950033	0.719695	1.25409
23.8795	0.950033	0.719695	1.25409
23.8795	0.950033	0.719695	1.25409
23.8795	0.950033	0.719695	1.25409
23.7947	0.95288	0.723088	1.2557
23.7947	0.95288	0.723088	1.2557
23.7947	0.95288	0.723088	1.2557
12.8378	1.32793	1.02954	1.71281
23.7947	0.95288	0.723088	1.2557
23.7947	0.95288	0.723088	1.2557
23.7947	0.95288	0.723088	1.2557
23.7947	0.95288	0.723088	1.2557
23.7947	0.95288	0.723088	1.2557
23.7947	0.95288	0.723088	1.2557
23.7947	0.95288	0.723088	1.2557
7.41684	1.33334	1.0004	1.77709
17.1116	1.26507	0.983549	1.62716
17.3196	1.25811	0.978369	1.61785
23.7947	0.95288	0.723088	1.2557
23.7947	0.95288	0.723088	1.2557
17.8973	1.23685	0.96255	1.58932
23.7947	0.95288	0.723088	1.2557
23.6331	0.958466	0.72966	1.25902
23.6331	0.958466	0.72966	1.25902
23.6331	0.958466	0.72966	1.25902
23.6331	0.958466	0.72966	1.25902
23.6331	0.958466	0.72966	1.25902
18.8474	1.19473	0.931095	1.53301
22.0561	1.02427	0.798601	1.31372
23.4661	0.964474	0.736602	1.26284
23.4661	0.964474	0.736602	1.26284
23.4661	0.964474	0.736602	1.26284
22.7351	0.993506	0.768302	1.28472
23.4661	0.964474	0.736602	1.26284
39.4661	0.709175	0.5	1.26858
36.6379	0.73852	0.5	1.26686
39.4661	0.709175	0.5	1.26858
39.4661	0.709175	0.5	1.26858
39.4661	0.709175	0.5	1.26858
39.4661	0.709175	0.5	1.26858
23.2991	0.970716	0.743676	1.26707
23.2991	0.970716	0.743676	1.26707
23.2991	0.970716	0.743676	1.26707
23.2991	0.970716	0.743676	1.26707
23.2991	0.970716	0.743676	1.26707
15.4251	1.30767	1.01448	1.6856
23.2991	0.970716	0.743676	1.26707
1.84257	1.80446	1.12586	2.89206
23.2991	0.970716	0.743676	1.26707
23.2991	0.970716	0.743676	1.26707
3.75359	1.58756	1.06257	2.37196
23.2991	0.970716	0.743676	1.26707
23.2142	0.973978	0.747316	1.26939
23.2142	0.973978	0.747316	1.26939
18.3135	1.2196	0.949717	1.56617
23.2142	0.973978	0.747316	1.26939
23.2142	0.973978	0.747316	1.26939
23.2142	0.973978	0.747316	1.26939
23.1294	0.9773	0.750984	1.27182
23.1294	0.9773	0.750984	1.27182
23.1294	0.9773	0.750984	1.27182
19.2361	1.17444	0.915693	1.5063
23.1294	0.9773	0.750984	1.27182
5.25394	1.46607	1.04601	2.05483
23.0472	0.980571	0.754557	1.27428
23.0472	0.980571	0.754557	1.27428
23.0472	0.980571	0.754557	1.27428
11.8905	1.32763	1.03095	1.70969
23.0472	0.980571	0.754557	1.27428
23.0472	0.980571	0.754557	1.27428
23.0472	0.980571	0.754557	1.27428
23.0472	0.980571	0.754557	1.27428
23.0472	0.980571	0.754557	1.27428
23.0472	0.980571	0.754557	1.27428
23.0472	0.980571	0.754557	1.27428
17.5086	1.25148	0.973433	1.60896
22.9624	0.98401	0.75827	1.27695
22.9624	0.98401	0.75827	1.27695
22.9624	0.98401	0.75827	1.27695
13.1472	1.32744	1.02814	1.71388
22.9624	0.98401	0.75827	1.27695
17.4237	1.2545	0.975679	1.613
22.9624	0.98401	0.75827	1.27695
22.9624	0.98401	0.75827	1.27695
22.9624	0.98401	0.75827	1.27695
22.9624	0.98401	0.75827	1.27695
22.4175	1.00746	0.78246	1.29717
22.9624	0.98401	0.75827	1.27695
39.4661	0.709175	0.5	1.26858
32.9309	0.783906	0.5	1.2577
1.1718	1.91669	1.15808	3.17223
39.4661	0.709175	0.5	1.26858
39.4661	0.709175	0.5	1.26858
39.4661	0.709175	0.5	1.26858
22.8802	0.987394	0.761883	1.27965
22.8802	0.987394	0.761883	1.27965
22.8802	0.987394	0.761883	1.27965
22.8802	0.987394	0.761883	1.27965
2.92129	1.66996	1.08026	2.58156
22.8802	0.987394	0.761883	1.27965
22.8802	0.987394	0.761883	1.27965
22.8802	0.987394	0.761883	1.27965
22.8802	0.987394	0.761883	1.27965
22.8802	0.987394	0.761883	1.27965
22.8802	0.987394	0.761883	1.27965
22.8802	0.987394	0.761883	1.27965
22.8802	0.987394	0.761883	1.27965
20.9911	1.07883	0.844736	1.37779
22.8802	0.987394	0.761883	1.27965
22.8802	0.987394	0.761883	1.27965
22.8802	0.987394	0.761883	1.27965
22.8802	0.987394	0.761883	1.27965
21.18	1.06867	0.836802	1.36479
8.24914	1.31555	0.997364	1.73525
15.0198	1.3136	1.01786	1.69528
22.7953	0.990948	0.765633	1.28257
22.7953	0.990948	0.765633	1.28257
16.6872	1.27812	0.993276	1.64466
22.7105	0.99456	0.769397	1.28562
22.7105	0.99456	0.769397	1.28562
22.7105	0.99456	0.769397	1.28562
22.7105	0.99456	0.769397	1.28562
21.0212	1.0772	0.84348	1.37567
22.7105	0.99456	0.769397	1.28562
22.5489	1.00159	0.77659	1.29178
12.7721	1.328	1.02978	1.71259
22.5489	1.00159	0.77659	1.29178
22.5489	1.00159	0.77659	1.29178
15.2608	1.31033	1.01612	1.68973
22.5489	1.00159	0.77659	1.29178
22.4668	1.00525	0.780257	1.29511
22.4668	1.00525	0.780257	1.29511
22.4668	1.00525	0.780257	1.29511
22.0726	1.02349	0.797869	1.31291
22.4668	1.00525	0.780257	1.29511
22.4668	1.00525	0.780257	1.29511
22.4668	1.00525	0.780257	1.29511
0.0465435	2.33661	0.5	18.7062
22.4668	1.00525	0.780257	1.29511
22.4668	1.00525	0.780257	1.29511
1.92197	1.79302	1.12154	2.86652
22.4668	1.00525	0.780257	1.29511
22.3819	1.00908	0.784051	1.29868
22.3819	1.00908	0.784051	1.29868
14.9322	1.31464	1.01834	1.69715
22.3819	1.00908	0.784051	1.29868
22.3819	1.00908	0.784051	1.29868
22.3819	1.00908	0.784051	1.29868
22.3819	1.00908	0.784051	1.29868
22.3819	1.00908	0.784051	1.29868
22.3819	1.00908	0.784051	1.29868
17.2348	1.26099	0.980515	1.6217
22.3819	1.00908	0.784051	1.29868
22.3819	1.00908	0.784051	1.29868
22.3819	1.00908	0.784051	1.29868
22.3819	1.00908	0.784051	1.29868
22.3819	1.00908	0.784051	1.29868
18.3381	1.21852	0.948914	1.56472
11.0883	1.32508	1.02827	1.70757
22.3819	1.00908	0.784051	1.29868
22.3819	1.00908	0.784051	1.29868
22.3819	1.00908	0.784051	1.29868
22.3819	1.00908	0.784051	1.29868
19.5838	1.15567	0.901647	1.48127
22.3819	1.00908	0.784051	1.29868
3.91786	1.5728	1.06022	2.3332
22.3819	1.00908	0.784051	1.29868
22.3819	1.00908	0.784051	1.29868
18.423	1.21476	0.946112	1.55969
22.3819	1.00908	0.784051	1.29868
22.3819	1.00908	0.784051	1.29868
22.3819	1.00908	0.784051	1.29868
22.2998	1.01283	0.787723	1.30227
22.2998	1.01283	0.787723	1.30227
19.5017	1.16013	0.904954	1.48725
22.2998	1.01283	0.787723	1.30227
22.2998	1.01283	0.787723	1.30227
22.2998	1.01283	0.787723	1.30227
39.3812	0.709997	0.5	1.2686
39.3812	0.709997	0.5	1.2686
39.3812	0.709997	0.5	1.2686
39.3812	0.709997	0.5	1.2686
21.3361	1.06042	0.830154	1.35457
39.3812	0.709997	0.5	1.2686
22.2149	1.01677	0.791517	1.30612
18.0726	1.22979	0.957305	1.57985
22.2149	1.01677	0.791517	1.30612
22.2149	1.01677	0.791517	1.30612
22.2149	1.01677	0.791517	1.30612
22.2149	1.01677	0.791517	1.30612
22.13	1.02076	0.795306	1.31012
22.13	1.02076	0.795306	1.31012
22.13	1.02076	0.795306	1.31012
21.7029	1.04159	0.814231	1.33244
22.13	1.02076	0.795306	1.31012
22.13	1.02076	0.795306	1.31012
22.13	1.02076	0.795306	1.31012
15.666	1.30322	1.01152	1.67904
22.13	1.02076	0.795306	1.31012
22.13	1.02076	0.795306	1.31012
22.13	1.02076	0.795306	1.31012
22.13	1.02076	0.795306	1.31012
22.13	1.02076	0.795306	1.31012
22.13	1.02076	0.795306	1.31012
2.25873	1.74765	1.10474	2.7647
22.13	1.02076	0.795306	1.31012
22.13	1.02076	0.795306	1.31012
8.66804	1.31338	1.00104	1.72317
18.924	1.19087	0.928183	1.52791
18.8364	1.19527	0.931506	1.53373
21.963	1.02876	0.802741	1.3184
21.963	1.02876	0.802741	1.3184
21.963	1.02876	0.802741	1.3184
21.963	1.02876	0.802741	1.3184
21.963	1.02876	0.802741	1.3184
21.963	1.02876	0.802741	1.3184
10.3573	1.3211	1.02244	1.707
2.09172	1.76956	1.11273	2.8141
21.963	1.02876	0.802741	1.3184
15.0637	1.31307	1.01761	1.69431
16.4052	1.28597	0.999096	1.65523
21.8809	1.03276	0.806383	1.32269
21.8809	1.03276	0.806383	1.32269
21.8809	1.03276	0.806383	1.32269
21.8809	1.03276	0.806383	1.32269
21.8809	1.03276	0.806383	1.32269
21.8809	1.03276	0.806383	1.32269
21.8809	1.03276	0.806383	1.32269
21.8809	1.03276	0.806383	1.32269
21.8809	1.03276	0.806383	1.32269
21.8809	1.03276	0.806383	1.32269
21.8809	1.03276	0.806383	1.32269
39.2991	0.710796	0.5	1.26861
39.2991	0.710796	0.5	1.26861
31.9288	0.797739	0.507467	1.25405
39.2991	0.710796	0.5	1.26861
39.2991	0.710796	0.5	1.26861
39.2991	0.710796	0.5	1.26861
21.796	1.03695	0.810134	1.32726
21.796	1.03695	0.810134	1.32726
21.796	1.03695	0.810134	1.32726
20.1232	1.12625	0.880021	1.44138
14.7379	1.31682	1.0194	1.70103
16.8925	1.27199	0.988711	1.63644
21.796	1.03695	0.810134	1.32726
15.8741	1.29888	1.00849	1.67289
21.796	1.03695	0.810134	1.32726
21.796	1.03695	0.810134	1.32726
21.796	1.03695	0.810134	1.32726
21.796	1.03695	0.810134	1.32726
21.7112	1.04118	0.81387	1.33197
21.7112	1.04118	0.81387	1.33197
21.7112	1.04118	0.81387	1.33197
20.8104	1.08865	0.852212	1.39069
16.4162	1.28568	0.99888	1.65483
21.7112	1.04118	0.81387	1.33197
21.6318	1.04518	0.817349	1.33652
21.6318	1.04518	0.817349	1.33652
21.6318	1.04518	0.817349	1.33652
21.2047	1.06736	0.835758	1.36314
21.6318	1.04518	0.817349	1.33652
21.6318	1.04518	0.817349	1.33652
21.6318	1.04518	0.817349	1.33652
21.6318	1.04518	0.817349	1.33652
10.8337	1.32385	1.02661	1.70715
21.6318	1.04518	0.817349	1.33652
21.6318	1.04518	0.817349	1.33652
15.4798	1.30671	1.01386	1.68416
21.6318	1.04518	0.817349	1.33652
21.6318	1.04518	0.817349	1.33652
21.6318	1.04518	0.817349	1.33652
21.6318	1.04518	0.817349	1.33652
21.6318	1.04518	0.817349	1.33652
21.6318	1.04518	0.817349	1.33652
16.3504	1.28742	1.00016	1.65718
21.5469	1.0495	0.821051	1.34152
21.5469	1.0495	0.821051	1.34152
21.5469	1.0495	0.821051	1.34152
21.5469	1.0495	0.821051	1.34152
21.5469	1.0495	0.821051	1.34152
21.5469	1.0495	0.821051	1.34152
21.5469	1.0495	0.821051	1.34152
5.33607	1.46015	1.04508	2.04007
21.5469	1.0495	0.821051	1.34152
3.00068	1.66146	1.07804	2.56064
21.5469	1.0495	0.821051	1.34152
21.4648	1.05373	0.824614	1.3465
21.4648	1.05373	0.824614	1.3465
21.4648	1.05373	0.824614	1.3465
21.4648	1.05373	0.824614	1.3465
21.4648	1.05373	0.824614	1.3465
21.4648	1.05373	0.824614	1.3465
14.0862	1.32292	1.02294	1.71088
21.4648	1.05373	0.824614	1.3465
21.4648	1.05373	0.824614	1.3465
21.4648	1.05373	0.824614	1.3465
21.4648	1.05373	0.824614	1.3465
21.4648	1.05373	0.824614	1.3465
21.3799	1.05813	0.828274	1.35178
21.3799	1.05813	0.828274	1.35178
19.2498	1.17371	0.915137	1.50533
21.3799	1.05813	0.828274	1.35178
11.5921	1.32693	1.0304	1.7088
21.3799	1.05813	0.828274	1.35178
21.3799	1.05813	0.828274	1.35178
21.3799	1.05813	0.828274	1.35178
15.2854	1.30995	1.01589	1.68913
21.3799	1.05813	0.828274	1.35178
21.3799	1.05813	0.828274	1.35178
21.3799	1.05813	0.828274	1.35178
21.3799	1.05813	0.828274	1.35178
21.3799	1.05813	0.828274	1.35178
21.3799	1.05813	0.828274	1.35178
21.3799	1.05813	0.828274	1.35178
10.2533	1.32044	1.02135	1.70712
0.605065	2.04903	1.09309	3.84096
21.2129	1.06692	0.835409	1.3626
21.2129	1.06692	0.835409	1.3626
21.2129	1.06692	0.835409	1.3626
21.2129	1.06692	0.835409	1.3626
21.2129	1.06692	0.835409	1.3626
21.2129	1.06692	0.835409	1.3626
21.128	1.07145	0.838999	1.3683
21.128	1.07145	0.838999	1.3683
21.128	1.07145	0.838999	1.3683
21.128	1.07145	0.838999	1.3683
21.128	1.07145	0.838999	1.3683
21.128	1.07145	0.838999	1.3683
21.0459	1.07586	0.842449	1.37395
21.0459	1.07586	0.842449	1.37395
21.0459	1.07586	0.842449	1.37395
21.0459	1.07586	0.842449	1.37395
21.0459	1.07586	0.842449	1.37395
15.7344	1.30184	1.01056	1.67706
19.7317	1.14764	0.895709	1.47043
21.0459	1.07586	0.842449	1.37395
21.0459	1.07586	0.842449	1.37395
21.0459	1.07586	0.842449	1.37395
12.1123	1.32796	1.03103	1.71039
21.0459	1.07586	0.842449	1.37395
19.0856	1.18249	0.921817	1.51688
13.7988	1.32491	1.02452	1.71338
21.0459	1.07586	0.842449	1.37395
21.0459	1.07586	0.842449	1.37395
18.9733	1.18835	0.926274	1.52459
21.0459	1.07586	0.842449	1.37395
16.8624	1.27291	0.989397	1.63767
20.961	1.08046	0.845989	1.37992
20.961	1.08046	0.845989	1.37992
20.961	1.08046	0.845989	1.37992
20.961	1.08046	0.845989	1.37992
14.4038	1.3202	1.02121	1.70674
20.961	1.08046	0.845989	1.37992
11.9179	1.32768	1.03097	1.70977
20.961	1.08046	0.845989	1.37992
20.961	1.08046	0.845989	1.37992
20.961	1.08046	0.845989	1.37992
20.961	1.08046	0.845989	1.37992
20.961	1.08046	0.845989	1.37992
20.961	1.08046	0.845989	1.37992
20.961	1.08046	0.845989	1.37992
20.961	1.08046	0.845989	1.37992
20.961	1.08046	0.845989	1.37992
20.961	1.08046	0.845989	1.37992
20.961	1.08046	0.845989	1.37992
20.961	1.08046	0.845989	1.37992
19.4798	1.16131	0.905837	1.48884
20.961	1.08046	0.845989	1.37992
20.961	1.08046	0.845989	1.37992
20.1999	1.12205	0.876946	1.43567
20.8789	1.08493	0.849392	1.38577
20.8789	1.08493	0.849392	1.38577
20.8789	1.08493	0.849392	1.38577
20.8789	1.08493	0.849392	1.38577
20.8789	1.08493	0.849392	1.38577
20.8789	1.08493	0.849392	1.38577
34.256	0.766686	0.5	1.26182
32.0082	0.796616	0.505918	1.25435
39.1294	0.712457	0.5	1.26862
30.1383	0.824359	0.545044	1.24681
38.2094	0.721705	0.5	1.26839
24.0027	0.946008	0.714848	1.25192
20.1123	1.12685	0.880459	1.44219
20.8789	1.08493	0.849392	1.38577
20.8789	1.08493	0.849392	1.38577
20.8789	1.08493	0.849392	1.38577
20.8789	1.08493	0.849392	1.38577
18.3436	1.21828	0.948735	1.5644
20.794	1.08955	0.852887	1.39188
20.794	1.08955	0.852887	1.39188
20.794	1.08955	0.852887	1.39188
15.0253	1.31354	1.01783	1.69516
20.794	1.08955	0.852887	1.39188
20.794	1.08955	0.852887	1.39188
20.794	1.08955	0.852887	1.39188
20.794	1.08955	0.852887	1.39188
20.794	1.08955	0.852887	1.39188
20.794	1.08955	0.852887	1.39188
20.794	1.08955	0.852887	1.39188
20.794	1.08955	0.852887	1.39188
20.7091	1.09418	0.856363	1.39804
20.7091	1.09418	0.856363	1.39804
20.7091	1.09418	0.856363	1.39804
20.7091	1.09418	0.856363	1.39804
20.7091	1.09418	0.856363	1.39804
20.7091	1.09418	0.856363	1.39804
20.6324	1.09837	0.859489	1.40364
2.79535	1.68375	1.08407	2.61515
20.6324	1.09837	0.859489	1.40364
20.6324	1.09837	0.859489	1.40364
20.6324	1.09837	0.859489	1.40364
20.6324	1.09837	0.859489	1.40364
15.2663	1.31025	1.01607	1.68959
20.0356	1.13105	0.883531	1.4479
20.5476	1.10301	0.862935	1.40988
20.5476	1.10301	0.862935	1.40988
20.0849	1.12835	0.881557	1.44423
15.7536	1.30144	1.01029	1.6765
20.4654	1.10751	0.866259	1.41594
20.4654	1.10751	0.866259	1.41594
20.4654	1.10751	0.866259	1.41594
20.4654	1.10751	0.866259	1.41594
15.8494	1.29942	1.00887	1.67364
20.4654	1.10751	0.866259	1.41594
20.2984	1.11665	0.872988	1.42833
16.7666	1.27579	0.991543	1.64153
20.2984	1.11665	0.872988	1.42833
20.2984	1.11665	0.872988	1.42833
20.2984	1.11665	0.872988	1.42833
20.2984	1.11665	0.872988	1.42833
39.1294	0.712457	0.5	1.26862
39.1294	0.712457	0.5	1.26862
34.5188	0.763408	0.5	1.26254
39.1294	0.712457	0.5	1.26862
39.1294	0.712457	0.5	1.26862
39.1294	0.712457	0.5	1.26862
20.2984	1.11665	0.872988	1.42833
20.2984	1.11665	0.872988	1.42833
20.2984	1.11665	0.872988	1.42833
20.2984	1.11665	0.872988	1.42833
20.2984	1.11665	0.872988	1.42833
19.6496	1.15211	0.899006	1.47646
20.2136	1.1213	0.876397	1.43465
20.2136	1.1213	0.876397	1.43465
20.2136	1.1213	0.876397	1.43465
10.3436	1.32101	1.0223	1.70701
20.2136	1.1213	0.876397	1.43465
20.2136	1.1213	0.876397	1.43465
20.1287	1.12595	0.879801	1.44097
10.0862	1.31936	1.01948	1.70745
8.26831	1.31538	0.997478	1.73459
20.1287	1.12595	0.879801	1.44097
20.1287	1.12595	0.879801	1.44097
20.1287	1.12595	0.879801	1.44097
20.0465	1.13045	0.883092	1.44709
20.0465	1.13045	0.883092	1.44709
20.0465	1.13045	0.883092	1.44709
20.0465	1.13045	0.883092	1.44709
20.0465	1.13045	0.883092	1.44709
12.668	1.32808	1.03012	1.71223
19.9617	1.13509	0.886492	1.4534
15.989	1.2963	1.00664	1.66931
19.9617	1.13509	0.886492	1.4534
19.9617	1.13509	0.886492	1.4534
19.9617	1.13509	0.886492	1.4534
19.9617	1.13509	0.886492	1.4534
18.883	1.19295	0.929751	1.53065
19.9617	1.13509	0.886492	1.4534
19.9617	1.13509	0.886492	1.4534
19.9617	1.13509	0.886492	1.4534
19.9617	1.13509	0.886492	1.4534
19.9617	1.13509	0.886492	1.4534
19.8795	1.13958	0.889782	1.4595
19.8795	1.13958	0.889782	1.4595
16.7146	1.27733	0.992683	1.64359
16.5476	1.28209	0.996225	1.65
19.8795	1.13958	0.889782	1.4595
19.8795	1.13958	0.889782	1.4595
19.7098	1.14883	0.896588	1.47204
19.7098	1.14883	0.896588	1.47204
19.7098	1.14883	0.896588	1.47204
19.7098	1.14883	0.896588	1.47204
19.7098	1.14883	0.896588	1.47204
19.7098	1.14883	0.896588	1.47204
39.0472	0.713265	0.5	1.26862
39.0472	0.713265	0.5	1.26862
39.0472	0.713265	0.5	1.26862
27.1622	0.874803	0.618811	1.2367
39.0472	0.713265	0.5	1.26862
39.0472	0.713265	0.5	1.26862
19.6331	1.153	0.899666	1.47767
19.6331	1.153	0.899666	1.47767
19.6331	1.153	0.899666	1.47767
19.6331	1.153	0.899666	1.47767
19.6331	1.153	0.899666	1.47767
19.6331	1.153	0.899666	1.47767
6.17112	1.40321	1.03216	1.90764
19.6331	1.153	0.899666	1.47767
19.6331	1.153	0.899666	1.47767
19.6331	1.153	0.899666	1.47767
10.5079	1.32202	1.0239	1.70694
13.0021	1.32771	1.02885	1.71338
19.5483	1.1576	0.903079	1.48387
18.8309	1.19554	0.93171	1.53409
19.5483	1.1576	0.903079	1.48387
19.5483	1.1576	0.903079	1.48387
7.65503	1.3259	0.997659	1.76215
19.5483	1.1576	0.903079	1.48387
19.4661	1.16205	0.906389	1.48983
19.4661	1.16205	0.906389	1.48983
19.4661	1.16205	0.906389	1.48983
19.4661	1.16205	0.906389	1.48983
13.8891	1.32434	1.02402	1.71274
19.4661	1.16205	0.906389	1.48983
19.4661	1.16205	0.906389	1.48983
19.4661	1.16205	0.906389	1.48983
19.4661	1.16205	0.906389	1.48983
19.4661	1.16205	0.906389	1.48983
0.520192	2.07459	1.05483	4.08019
13.8891	1.32434	1.02402	1.71274
38.9624	0.714104	0.5	1.26861
38.9624	0.714104	0.5	1.26861
23.9179	0.948767	0.718177	1.25339
37.4264	0.729918	0.5	1.26781
38.9624	0.714104	0.5	1.26861
38.9624	0.714104	0.5	1.26861
19.3812	1.16664	0.909815	1.49595
19.3812	1.16664	0.909815	1.49595
19.3812	1.16664	0.909815	1.49595
19.3812	1.16664	0.909815	1.49595
19.3812	1.16664	0.909815	1.49595
17.0404	1.26736	0.985259	1.63023
19.3812	1.16664	0.909815	1.49595
19.3812	1.16664	0.909815	1.49595
6.08898	1.40857	1.0338	1.91919
18.1054	1.22844	0.956297	1.57803
19.3812	1.16664	0.909815	1.49595
19.3812	1.16664	0.909815	1.49595
19.3812	1.16664	0.909815	1.49595
19.3812	1.16664	0.909815	1.49595
5.08693	1.47831	1.04779	2.08573
12.0767	1.32792	1.03104	1.71028
15.0007	1.31383	1.01797	1.69569
19.3812	1.16664	0.909815	1.49595
6.58727	1.37679	1.0222	1.85439
19.2991	1.17106	0.913139	1.50183
19.2991	1.17106	0.913139	1.50183
6.78166	1.36484	1.01647	1.83259
19.2991	1.17106	0.913139	1.50183
19.2991	1.17106	0.913139	1.50183
16.616	1.28017	0.994796	1.64741
19.1294	1.18016	0.920035	1.51383
14.6694	1.31756	1.01977	1.7023
19.1294	1.18016	0.920035	1.51383
17.4702	1.25285	0.974453	1.6108
16.3313	1.28792	1.00053	1.65786
19.0472	1.18451	0.923357	1.51953
19.0472	1.18451	0.923357	1.51953
19.0472	1.18451	0.923357	1.51953
16.2519	1.28996	1.00203	1.66062
19.0472	1.18451	0.923357	1.51953
16.6571	1.27899	0.993923	1.64583
38.9624	0.714104	0.5	1.26861
38.9624	0.714104	0.5	1.26861
38.9624	0.714104	0.5	1.26861
38.9624	0.714104	0.5	1.26861
38.9624	0.714104	0.5	1.26861
24.7502	0.924299	0.687669	1.24236
19.0472	1.18451	0.923357	1.51953
19.0472	1.18451	0.923357	1.51953
19.0472	1.18451	0.923357	1.51953
19.0472	1.18451	0.923357	1.51953
18.2669	1.22161	0.951218	1.56887
19.0472	1.18451	0.923357	1.51953
19.0472	1.18451	0.923357	1.51953
18.7379	1.2001	0.935143	1.54014
19.0472	1.18451	0.923357	1.51953
19.0472	1.18451	0.923357	1.51953
19.0472	1.18451	0.923357	1.51953
11.3238	1.32605	1.02945	1.70809
3.66872	1.59536	1.06389	2.39233
19.0472	1.18451	0.923357	1.51953
19.0472	1.18451	0.923357	1.51953
19.0472	1.18451	0.923357	1.51953
19.0472	1.18451	0.923357	1.51953
19.0472	1.18451	0.923357	1.51953
18.9624	1.18892	0.926701	1.52533
18.9624	1.18892	0.926701	1.52533
18.9624	1.18892	0.926701	1.52533
18.9624	1.18892	0.926701	1.52533
18.9624	1.18892	0.926701	1.52533
18.9624	1.18892	0.926701	1.52533
18.8802	1.19309	0.929855	1.53083
18.8802	1.19309	0.929855	1.53083
10.0068	1.31885	1.01855	1.70768
18.8802	1.19309	0.929855	1.53083
18.8802	1.19309	0.929855	1.53083
18.8802	1.19309	0.929855	1.53083
3.9206	1.57256	1.06018	2.33256
18.8802	1.19309	0.929855	1.53083
18.8802	1.19309	0.929855	1.53083
18.8802	1.19309	0.929855	1.53083
11.0828	1.32506	1.02824	1.70756
18.8802	1.19309	0.929855	1.53083
18.8802	1.19309	0.929855	1.53083
18.8802	1.19309	0.929855	1.53083
18.8802	1.19309	0.929855	1.53083
18.8802	1.19309	0.929855	1.53083
18.8802	1.19309	0.929855	1.53083
18.8802	1.19309	0.929855	1.53083
18.8802	1.19309	0.929855	1.53083
18.8802	1.19309	0.929855	1.53083
18.8802	1.19309	0.929855	1.53083
18.8802	1.19309	0.929855	1.53083
18.8802	1.19309	0.929855	1.53083
9.27584	1.31454	1.0089	1.71279
38.8802	0.71492	0.5	1.26861
38.8802	0.71492	0.5	1.26861
38.8802	0.71492	0.5	1.26861
38.8802	0.71492	0.5	1.26861
38.8802	0.71492	0.5	1.26861
38.8802	0.71492	0.5	1.26861
18.7105	1.20143	0.936135	1.5419
18.7105	1.20143	0.936135	1.5419
18.7105	1.20143	0.936135	1.5419
18.7105	1.20143	0.936135	1.5419
18.7105	1.20143	0.936135	1.5419
7.11294	1.3462	1.00653	1.80051
18.6338	1.20508	0.938872	1.54676
18.6338	1.20508	0.938872	1.54676
13.4921	1.32646	1.02622	1.71456
18.6338	1.20508	0.938872	1.54676
18.6338	1.20508	0.938872	1.54676
18.6338	1.20508	0.938872	1.54676
18.5489	1.20904	0.941836	1.55204
18.5489	1.20904	0.941836	1.55204
18.5489	1.20904	0.941836	1.55204
16.0958	1.2938	1.00483	1.66587
18.5489	1.20904	0.941836	1.55204
18.5489	1.20904	0.941836	1.55204
18.4668	1.21279	0.944641	1.55705
18.4668	1.21279	0.944641	1.55705
18.4668	1.21279	0.944641	1.55705
18.4668	1.21279	0.944641	1.55705
18.4668	1.21279	0.944641	1.55705
18.4668	1.21279	0.944641	1.55705
6.5462	1.37935	1.02331	1.85925
18.4668	1.21279	0.944641	1.55705
18.4668	1.21279	0.944641	1.55705
18.4668	1.21279	0.944641	1.55705
18.4668	1.21279	0.944641	1.55705
18.4668	1.21279	0.944641	1.55705
38.8802	0.71492	0.5	1.26861
27.8275	0.862782	0.601173	1.23823
38.8802	0.71492	0.5	1.26861
38.8802	0.71492	0.5	1.26861
38.8802	0.71492	0.5	1.26861
38.8802	0.71492	0.5	1.26861
18.4668	1.21279	0.944641	1.55705
18.4668	1.21279	0.944641	1.55705
18.4668	1.21279	0.944641	1.55705
13.0924	1.32755	1.02842	1.71369
18.4668	1.21279	0.944641	1.55705
18.4668	1.21279	0.944641	1.55705
18.3819	1.21659	0.947476	1.56214
18.3819	1.21659	0.947476	1.56214
18.3819	1.21659	0.947476	1.56214
18.3819	1.21659	0.947476	1.56214
18.3819	1.21659	0.947476	1.56214
18.3819	1.21659	0.947476	1.56214
18.3819	1.21659	0.947476	1.56214
18.3819	1.21659	0.947476	1.56214
18.3819	1.21659	0.947476	1.56214
18.3819	1.21659	0.947476	1.56214
18.3819	1.21659	0.947476	1.56214
18.3819	1.21659	0.947476	1.56214
18.3819	1.21659	0.947476	1.56214
18.3819	1.21659	0.947476	1.56214
18.3819	1.21659	0.947476	1.56214
14.5927	1.31835	1.02019	1.70366
18.3819	1.21659	0.947476	1.56214
14.3299	1.32088	1.02161	1.70782
18.2998	1.22019	0.95016	1.56697
5.74401	1.43162	1.03971	1.97127
18.2998	1.22019	0.95016	1.56697
18.2998	1.22019	0.95016	1.56697
18.2998	1.22019	0.95016	1.56697
18.2998	1.22019	0.95016	1.56697
16.4627	1.28443	0.997953	1.65314
18.2998	1.22019	0.95016	1.56697
18.2998	1.22019	0.95016	1.56697
16.104	1.2936	1.00469	1.6656
18.2998	1.22019	0.95016	1.56697
18.2998	1.22019	0.95016	1.56697
18.13	1.22741	0.955535	1.57665
18.13	1.22741	0.955535	1.57665
18.13	1.22741	0.955535	1.57665
18.13	1.22741	0.955535	1.57665
14.8583	1.31549	1.01874	1.69867
18.13	1.22741	0.955535	1.57665
18.13	1.22741	0.955535	1.57665
18.13	1.22741	0.955535	1.57665
18.13	1.22741	0.955535	1.57665
9.08693	1.31381	1.00631	1.71527
18.13	1.22741	0.955535	1.57665
18.13	1.22741	0.955535	1.57665
38.7953	0.715766	0.5	1.26859
36.0137	0.745576	0.5	1.26586
38.7953	0.715766	0.5	1.26859
30.1656	0.823933	0.54443	1.24693
35.4798	0.75179	0.5	1.26481
38.7953	0.715766	0.5	1.26859
17.8809	1.2375	0.96303	1.59018
17.8809	1.2375	0.96303	1.59018
17.8809	1.2375	0.96303	1.59018
17.8809	1.2375	0.96303	1.59018
1.80698	1.80969	1.12783	2.90378
17.8809	1.2375	0.96303	1.59018
17.8809	1.2375	0.96303	1.59018
15.4634	1.30701	1.01405	1.68459
8.64339	1.31342	1.00076	1.72375
17.8809	1.2375	0.96303	1.59018
17.8809	1.2375	0.96303	1.59018
17.8809	1.2375	0.96303	1.59018
17.796	1.2408	0.965483	1.59461
17.796	1.2408	0.965483	1.59461
17.796	1.2408	0.965483	1.59461
17.796	1.2408	0.965483	1.59461
17.796	1.2408	0.965483	1.59461
17.796	1.2408	0.965483	1.59461
17.796	1.2408	0.965483	1.59461
17.796	1.2408	0.965483	1.59461
16.2957	1.28884	1.00121	1.6591
15.0938	1.31268	1.01742	1.69364
17.1855	1.26264	0.98174	1.62391
17.796	1.2408	0.965483	1.59461
17.796	1.2408	0.965483	1.59461
17.796	1.2408	0.965483	1.59461
17.796	1.2408	0.965483	1.59461
10.2505	1.32042	1.02132	1.70712
17.796	1.2408	0.965483	1.59461
17.796	1.2408	0.965483	1.59461
17.7112	1.24403	0.967887	1.59895
17.7112	1.24403	0.967887	1.59895
17.7112	1.24403	0.967887	1.59895
17.7112	1.24403	0.967887	1.59895
17.7112	1.24403	0.967887	1.59895
17.7112	1.24403	0.967887	1.59895
17.5469	1.2501	0.972404	1.6071
17.5469	1.2501	0.972404	1.6071
17.5469	1.2501	0.972404	1.6071
16.1478	1.29254	1.00392	1.66415
17.5469	1.2501	0.972404	1.6071
6.12183	1.40642	1.03316	1.91453
38.7105	0.716616	0.5	1.26858
37.5852	0.728227	0.5	1.26796
38.7105	0.716616	0.5	1.26858
38.7105	0.716616	0.5	1.26858
38.7105	0.716616	0.5	1.26858
38.7105	0.716616	0.5	1.26858
17.3799	1.25603	0.97682	1.61506
17.3799	1.25603	0.97682	1.61506
3.16769	1.64408	1.07378	2.51727
17.3799	1.25603	0.97682	1.61506
17.3799	1.25603	0.97682	1.61506
17.3799	1.25603	0.97682	1.61506
17.2977	1.25886	0.978927	1.61885
17.2977	1.25886	0.978927	1.61885
17.2977	1.25886	0.978927	1.61885
17.2977	1.25886	0.978927	1.61885
13.9658	1.32382	1.0236	1.71208
17.2977	1.25886	0.978927	1.61885
17.2977	1.25886	0.978927	1.61885
17.2977	1.25886	0.978927	1.61885
17.2977	1.25886	0.978927	1.61885
17.2977	1.25886	0.978927	1.61885
17.2977	1.25886	0.978927	1.61885
17.2977	1.25886	0.978927	1.61885
17.2129	1.26173	0.981061	1.62269
6.07529	1.40946	1.03407	1.92114
17.2129	1.26173	0.981061	1.62269
17.2129	1.26173	0.981061	1.62269
17.2129	1.26173	0.981061	1.62269
17.2129	1.26173	0.981061	1.62269
16.961	1.26987	0.98713	1.63359
6.60917	1.37543	1.02159	1.85183
16.961	1.26987	0.98713	1.63359
16.961	1.26987	0.98713	1.63359
6.80356	1.36351	1.01578	1.83026
16.961	1.26987	0.98713	1.63359
16.8789	1.27241	0.989024	1.637
16.8789	1.27241	0.989024	1.637
16.8789	1.27241	0.989024	1.637
15.5072	1.30622	1.01354	1.68343
16.8789	1.27241	0.989024	1.637
16.8789	1.27241	0.989024	1.637
16.794	1.27498	0.990936	1.64044
[truncated: 2,723 more rows]
